# Supplementary material
Source: Royal Society of Chemistry journal article supplement (doi:10.1039/d5sm01257k)
Supplement: d5sm01257k1.xlsx [file d5sm01257k1.xlsx]

## Sheet: Fig 1g
Data from Figure 1g
Mean Square Displacement (MSD) of particles undergoing rolling (black), tumbling (red), and rotating (blue) motions.
Rolling	h ~ 2.5 μm		Tumbling	h ~ 18 μm		Rotating	h ~ 40 μm
Lag time (s)	MSD (μm²)		Lag time (s)	MSD (μm²)		Lag time (s)	MSD (μm²)
0.0122	0.08459		0.008	0.07151		0.0035	0.06537
0.0244	0.22228		0.016	0.07453		0.007	0.11923
0.0366	0.42383		0.024	0.04408		0.0105	0.09808
0.0488	0.70657		0.032	0.1025		0.014	0.09711
0.061	1.05199		0.04	0.09729		0.0175	0.12801
0.0732	1.47673		0.048	0.09775		0.021	0.09451
0.0854	1.97171		0.056	0.1361		0.0245	0.03391
0.0976	2.54875		0.064	0.14117		0.028	0.07932
0.1098	3.19597		0.072	0.16034		0.0315	0.1423
0.122	3.91412		0.08	0.17698		0.035	0.13003
0.1342	4.69472		0.088	0.19996		0.0385	0.12751
0.1464	5.54012		0.096	0.22918		0.042	0.16586
0.1586	6.45743		0.104	0.23323		0.0455	0.15495
0.1708	7.44748		0.112	0.27334		0.049	0.09823
0.183	8.50877		0.12	0.30489		0.0525	0.12128
0.1952	9.66744		0.128	0.3025		0.056	0.1888
0.2074	10.901		0.136	0.35647		0.0595	0.18821
0.2196	12.1978		0.144	0.39051		0.063	0.18142
0.2318	13.5755		0.152	0.38962		0.0665	0.22202
0.244	15.0323		0.16	0.45107		0.07	0.23426
0.2562	16.5555		0.168	0.4844		0.0735	0.18516
0.2684	18.1636		0.176	0.49255		0.077	0.19003
0.2806	19.8535		0.184	0.55581		0.0805	0.25746
0.2928	21.6266		0.192	0.59051		0.084	0.26706
0.305	23.4767		0.2	0.6094		0.0875	0.2488
0.3172	25.4047		0.208	0.6671		0.091	0.28823
0.3294	27.398		0.216	0.70715		0.0945	0.32182
0.3416	29.4925		0.224	0.7384		0.098	0.2864
0.3538	31.6768		0.232	0.7909		0.1015	0.27886
0.366	33.9205		0.24	0.83609		0.105	0.34013
0.3782	36.2522		0.248	0.87831		0.1085	0.35371
0.3904	38.6651		0.256	0.92484		0.112	0.3231
0.4026	41.1815		0.264	0.97767		0.1155	0.35841
0.4148	43.7863		0.272	1.03073		0.119	0.40969
0.427	46.473		0.28	1.07		0.1225	0.39104
0.4392	49.2353		0.288	1.13216		0.126	0.3746
0.4514	52.0664		0.296	1.19191		0.1295	0.42341
0.4636	54.9879		0.304	1.22684		0.133	0.4381
0.4758	57.991		0.312	1.30104		0.1365	0.40121
0.488	61.0474		0.32	1.36048		0.14	0.42725
0.5002	64.2117		0.328	1.39926		0.1435	0.48849
0.5124	67.4483		0.336	1.48094		0.147	0.48455
0.5246	70.7637		0.344	1.53951		0.1505	0.46391
0.5368	74.1949		0.352	1.58797		0.154	0.49875
0.549	77.6984		0.36	1.66771		0.1575	0.51643
0.5612	81.2715		0.368	1.72912		0.161	0.47591
0.5734	84.9639		0.376	1.78734		0.1645	0.48344
0.5856	88.7459		0.384	1.86339		0.168	0.54586
0.5978	92.5632		0.392	1.93393		0.1715	0.5571
0.61	96.4809		0.4	1.99768		0.175	0.53792
0.6222	100.479		0.408	2.07063		0.1785	0.55992
0.6344	104.522		0.416	2.14873		0.182	0.57888
0.6466	108.672		0.424	2.21819		0.1855	0.53477
0.6588	112.891		0.432	2.2898		0.189	0.52052
0.671	117.167		0.44	2.37302		0.1925	0.58001
0.6832	121.568		0.448	2.44724		0.196	0.60814
0.6954	126.042		0.456	2.51743		0.1995	0.58879
0.7076	130.6		0.464	2.609		0.203	0.5969
0.7198	135.214		0.472	2.68836		0.2065	0.61557
0.732	139.945		0.48	2.7594		0.21	0.57271
0.7442	144.82		0.488	2.85745		0.2135	0.53969
0.7564	149.767		0.496	2.93996		0.217	0.59152
0.7686	154.774		0.504	3.01494		0.2205	0.6296
0.7808	159.864		0.512	3.11648		0.224	0.60771
0.793	165.077		0.52	3.20259		0.2275	0.60583
0.8052	170.369		0.528	3.28268		0.231	0.62548
0.8174	175.716		0.536	3.38408		0.2345	0.58893
0.8296	181.128		0.544	3.47635		0.238	0.54037
0.8418	186.621		0.552	3.56188		0.2415	0.57838
0.854	192.195		0.56	3.66183		0.245	0.61969
0.8662	197.817		0.568	3.76079		0.2485	0.59801
0.8784	203.503		0.576	3.85215		0.252	0.58905
0.8906	209.263		0.584	3.95093		0.2555	0.60967
0.9028	215.114		0.592	4.05758		0.259	0.58031
0.915	221.014		0.6	4.15422		0.2625	0.52194
0.9272	227.011		0.608	4.25009		0.266	0.5416
0.9394	233.05		0.616	4.3636		0.2695	0.58319
0.9516	239.143		0.624	4.46501		0.273	0.56525
0.9638	245.402		0.632	4.56195		0.2765	0.54891
0.976	251.738		0.64	4.68163		0.28	0.56724
0.9882	258.152		0.648	4.78538		0.2835	0.54755
1.0004	264.619		0.656	4.88515		0.287	0.48779
1.0126	271.285		0.664	5.00812		0.2905	0.48955
1.0248	278.012		0.672	5.11548		0.294	0.53021
1.037	284.789		0.68	5.22041		0.2975	0.51525
1.0492	291.631		0.688	5.34257		0.301	0.48877
1.0614	298.634		0.696	5.45558		0.3045	0.50218
1.0736	305.728		0.704	5.56495		0.308	0.49797
1.0858	312.858		0.712	5.68654		0.3115	0.44493
1.098	320.202		0.72	5.806		0.315	0.43063
1.1102	327.607		0.728	5.91807		0.3185	0.4648
1.1224	335.069		0.736	6.03891		0.322	0.45249
1.1346	342.707		0.744	6.16349		0.3255	0.41564
1.1468	350.385		0.752	6.28056		0.329	0.42674
1.159	358.153		0.76	6.40166		0.3325	0.43915
1.1712	365.984		0.768	6.53102		0.336	0.39432
1.1834	374.001		0.776	6.65303		0.3395	0.36628
1.1956	382.19		0.784	6.77482		0.343	0.39322
1.2078	390.529		0.792	6.91028		0.3465	0.38634
1.22	398.848		0.8	7.03774		0.35	0.34159
1.2322	407.256		0.808	7.15981		0.3535	0.34866
1.2444	415.793		0.816	7.29974		0.357	0.37351
1.2566	424.32		0.824	7.43046		0.3605	0.34086
1.2688	432.964		0.832	7.55608		0.364	0.30743
1.281	441.598		0.84	7.69977		0.3675	0.32923
1.2932	450.259		0.848	7.8343		0.371	0.32689
1.3054	458.965		0.856	7.96377		0.3745	0.27652
1.3176	467.705		0.864	8.10915		0.378	0.27488
1.3298	476.561		0.872	8.24766		0.3815	0.30942
1.342	485.589		0.88	8.38405		0.385	0.29333
1.3542	494.687		0.888	8.53001		0.3885	0.26222
1.3664	503.801		0.896	8.67208		0.392	0.27804
1.3786	512.958		0.904	8.81365		0.3955	0.27858
1.3908	522.34		0.912	8.95846		0.399	0.22755
1.403	531.793		0.92	9.10629		0.4025	0.21576
1.4152	541.541		0.928	9.25206		0.406	0.25822
1.4274	551.472		0.936	9.39528		0.4095	0.26077
1.4396	561.447		0.944	9.54952		0.413	0.23366
1.4518	571.425		0.952	9.69862		0.4165	0.24108
1.464	581.393		0.96	9.8425		0.42	0.24661
1.4762	591.358		0.968	10.0015		0.4235	0.2009
1.4884	601.311		0.976	10.1513		0.427	0.18046
1.5006	611.244		0.984	10.2987		0.4305	0.22462
1.5128	621.177		0.992	10.4607		0.434	0.24333
1.525	631.083		1	10.6136		0.4375	0.22063
1.5372	640.975		1.008	10.7658		0.441	0.22276
1.5494	650.834		1.016	10.9296		0.4445	0.23683
1.5616	660.648		1.024	11.0864		0.448	0.20012
1.5738	670.398		1.032	11.2421		0.4515	0.16916
1.586	680.081		1.04	11.4075		0.455	0.20954
1.5982	689.746		1.048	11.5687		0.4585	0.24291
1.6104	699.613		1.056	11.7284		0.462	0.22733
1.6226	709.805		1.064	11.8944		0.4655	0.22756
1.6348	720.047		1.072	12.06		0.469	0.24847
1.647	730.581		1.08	12.2246		0.4725	0.22177
1.6592	741.139		1.088	12.39		0.476	0.18278
1.6714	751.655		1.096	12.5605		0.4795	0.21812
1.6836	762.22		1.104	12.7294		0.483	0.26348
1.6958	772.966		1.112	12.8946		0.4865	0.25562
1.708	783.808		1.12	13.0714		0.49	0.25202
1.7202	794.64		1.128	13.2422		0.4935	0.27664
1.7324	805.457		1.136	13.4083		0.497	0.26175
1.7446	816.212		1.144	13.5901		0.5005	0.22217
1.7568	826.823		1.152	13.7615		0.504	0.25056
1.769	837.523		1.16	13.9304		0.5075	0.30122
1.7812	848.038		1.168	14.1143		0.511	0.29822
1.7934	858.691		1.176	14.2862		0.5145	0.29051
1.8056	869.353		1.184	14.4602		0.518	0.31754
1.8178	879.784		1.192	14.6452		0.5215	0.31757
1.83	890.381		1.2	14.8207		0.525	0.28296
1.8422	901.272		1.208	15.0002		0.5285	0.29976
1.8544	912.43		1.216	15.1836		0.532	0.34979
1.8666	923.578		1.224	15.3635		0.5355	0.35206
1.8788	934.743		1.232	15.5476		0.539	0.34219
1.891	945.827		1.24	15.7284		0.5425	0.36875
1.9032	957.29		1.248	15.9147		0.546	0.38253
1.9154	968.683		1.256	16.1009		0.5495	0.35369
1.9276	980.082		1.264	16.281		0.553	0.35795
1.9398	991.916		1.272	16.4747		0.5565	0.405
1.952	1003.61		1.28	16.6611		0.56	0.41435
1.9642	1015.4		1.288	16.8421		0.5635	0.39968
1.9764	1027.6		1.296	17.0397		0.567	0.42135
1.9886	1039.78		1.304	17.2257		0.5705	0.44653
2.0008	1051.92		1.312	17.4114		0.574	0.42574
2.013	1063.97		1.32	17.6121		0.5775	0.42113
2.0252	1076.55		1.328	17.7998		0.581	0.46404
2.0374	1089.06		1.336	17.9911		0.5845	0.47805
2.0496	1101.65		1.344	18.1917		0.588	0.45474
2.0618	1114.29		1.352	18.3814		0.5915	0.46912
2.074	1127.37		1.36	18.578		0.595	0.50418
2.0862	1140.36		1.368	18.7779		0.5985	0.49447
2.0984	1153.25		1.376	18.9729		0.602	0.48242
2.1106	1166.25		1.384	19.1727		0.6055	0.51737
2.1228	1179.12		1.392	19.3715		0.609	0.53207
2.135	1192.08		1.4	19.5725		0.6125	0.50273
2.1472	1204.97		1.408	19.7753		0.616	0.51005
2.1594	1217.79		1.416	19.9739		0.6195	0.55137
2.1716	1230.48		1.424	20.1797		0.623	0.5511
2.1838	1243.11		1.432	20.3833		0.6265	0.53344
2.196	1255.73		1.44	20.5829		0.63	0.55809
2.2082	1268.25		1.448	20.7944		0.6335	0.57319
2.2204	1280.54		1.456	20.9992		0.637	0.54248
2.2326	1292.77		1.464	21.1999		0.6405	0.54017
2.2448	1305.38		1.472	21.4152		0.644	0.58191
2.257	1318.08		1.48	21.622		0.6475	0.58914
2.2692	1330.51		1.488	21.8265		0.651	0.56971
2.2814	1342.84		1.496	22.044		0.6545	0.58393
2.2936	1355.96		1.504	22.2523		0.658	0.60055
2.3058	1369.39		1.512	22.4604		0.6615	0.57002
2.318	1382.56		1.52	22.6778		0.665	0.55517
2.3302	1395.73		1.528	22.8888		0.6685	0.59232
2.3424	1408.77		1.536	23.1023		0.672	0.60908
2.3546	1422.48		1.544	23.3191		0.6755	0.59083
2.3668	1435.83		1.552	23.5328		0.679	0.59477
2.379	1449		1.56	23.7503		0.6825	0.61041
2.3912	1462.38		1.568	23.9673		0.686	0.5813
2.4034	1475.14		1.576	24.1865		0.6895	0.5549
2.4156	1487.73		1.584	24.4077		0.693	0.58676
2.4278	1500.6		1.592	24.6239		0.6965	0.61316
2.44	1512.36		1.6	24.8467		0.7	0.59488
2.4522	1524.47		1.608	25.0706		0.7035	0.5877
2.4644	1537		1.616	25.2867		0.707	0.60144
2.4766	1549.17		1.624	25.5136		0.7105	0.57762
2.4888	1561.33		1.632	25.7385		0.714	0.54361
2.501	1574.21		1.64	25.956		0.7175	0.56818
2.5132	1586.96		1.648	26.1862		0.721	0.59879
2.5254	1599.55		1.656	26.4118		0.7245	0.58052
2.5376	1612.82		1.664	26.6338		0.728	0.56524
2.5498	1625.46		1.672	26.8638		0.7315	0.57902
2.562	1638.21		1.68	27.0882		0.735	0.56273
2.5742	1650.77		1.688	27.3125		0.7385	0.52323
2.5864	1663.12		1.696	27.5429		0.742	0.53836
2.5986	1674.76		1.704	27.7704		0.7455	0.57071
2.6108	1686.39		1.712	27.9993		0.749	0.55563
2.623	1698.63		1.72	28.2302		0.7525	0.5357
2.6352	1711.55		1.728	28.4607		0.756	0.54825
2.6474	1724.56		1.736	28.6944		0.7595	0.53785
2.6596	1738.09		1.744	28.9261		0.763	0.49661
2.6718	1750.53		1.752	29.1578		0.7665	0.50163
2.684	1763.88		1.76	29.3963		0.77	0.5349
2.6962	1778.57		1.768	29.6284		0.7735	0.52495
2.7084	1792.34		1.776	29.8636		0.777	0.50141
2.7206	1805.77		1.784	30.1052		0.7805	0.5093
2.7328	1819.56		1.792	30.3362		0.784	0.50651
2.745	1834.01		1.8	30.5743		0.7875	0.46963
2.7572	1848.65		1.808	30.8167		0.791	0.46632
2.7694	1864.95		1.816	31.0509		0.7945	0.49851
2.7816	1880.92		1.824	31.2933		0.798	0.49314
2.7938	1895.04		1.832	31.5355		0.8015	0.46542
2.806	1910.07		1.84	31.7732		0.805	0.46863
2.8182	1923.74		1.848	32.0173		0.8085	0.47679
2.8304	1936.3		1.856	32.2587		0.812	0.44763
2.8426	1954.58		1.864	32.5012		0.8155	0.43522
2.8548	1973.3		1.872	32.7453		0.819	0.46213
2.867	1992.3		1.88	32.9872		0.8225	0.46222
2.8792	2011.64		1.888	33.2354		0.826	0.43197
2.8914	2031.19		1.896	33.4792		0.8295	0.43338
2.9036	2046.91		1.904	33.7238		0.833	0.45165
2.9158	2062.97		1.912	33.9754		0.8365	0.43005
2.928	2079.19		1.92	34.2183		0.84	0.40921
2.9402	2101.19		1.928	34.4651		0.8435	0.43217
2.9524	2120.33		1.936	34.7181		0.847	0.43886
2.9646	2139.22		1.944	34.9633		0.8505	0.407
2.9768	2161.19		1.952	35.2131		0.854	0.40541
2.989	2181.5		1.96	35.4661		0.8575	0.42988
3.0012	2195.43		1.968	35.7144		0.861	0.41755
			1.976	35.9659		0.8645	0.39447
			1.984	36.219		0.868	0.41335
			1.992	36.47		0.8715	0.42362
			2	36.7229		0.875	0.39118
			2.008	36.9759		0.8785	0.38455
			2.016	37.2288		0.882	0.41486
			2.024	37.4832		0.8855	0.41421
			2.032	37.7364		0.889	0.39266
			2.04	37.9934		0.8925	0.40397
			2.048	38.2501		0.896	0.41528
			2.056	38.5032		0.8995	0.38505
			2.064	38.7646		0.903	0.3738
			2.072	39.0213		0.9065	0.40792
			2.08	39.2771		0.91	0.41903
			2.088	39.5421		0.9135	0.39995
			2.096	39.7982		0.917	0.40207
			2.104	40.0581		0.9205	0.41555
			2.112	40.3242		0.924	0.39093
			2.12	40.5804		0.9275	0.37397
			2.128	40.8451		0.931	0.40697
			2.136	41.1108		0.9345	0.42925
			2.144	41.3701		0.938	0.41282
			2.152	41.6373		0.9415	0.40916
			2.16	41.8968		0.945	0.42543
			2.168	42.1566		0.9485	0.4077
			2.176	42.4226		0.952	0.38293
			2.184	42.682		0.9555	0.41232
			2.192	42.9472		0.959	0.44452
			2.2	43.2125		0.9625	0.43342
			2.208	43.4722		0.966	0.42608
			2.216	43.7413		0.9695	0.44266
			2.224	44.0051		0.973	0.43011
			2.232	44.2682		0.9765	0.39939
			2.24	44.5395		0.98	0.42461
			2.248	44.8022		0.9835	0.46375
			2.256	45.0691		0.987	0.45826
			2.264	45.3411		0.9905	0.4466
			2.272	45.6053		0.994	0.4616
			2.28	45.8751		0.9975	0.45577
			2.288	46.1463		1.001	0.42577
			2.296	46.413		1.0045	0.44361
			2.304	46.6847		1.008	0.48435
			2.312	46.9571		1.0115	0.48309
			2.32	47.2253		1.015	0.46907
			2.328	47.4978		1.0185	0.48321
			2.336	47.7704		1.022	0.48592
			2.344	48.0412		1.0255	0.45825
			2.352	48.3165		1.029	0.46429
			2.36	48.5888		1.0325	0.50285
			2.368	48.8649		1.036	0.50777
			2.376	49.1408		1.0395	0.49311
			2.384	49.4122		1.043	0.50443
			2.392	49.693		1.0465	0.51461
			2.4	49.967		1.05	0.49048
			2.408	50.2407		1.0535	0.48559
			2.416	50.5242		1.057	0.52033
			2.424	50.7961		1.0605	0.53167
			2.432	51.075		1.064	0.5142
			2.44	51.3584		1.0675	0.52112
			2.448	51.6319		1.071	0.53865
			2.456	51.9136		1.0745	0.5209
			2.464	52.1966		1.078	0.50826
			2.472	52.4744		1.0815	0.53689
			2.48	52.7579		1.085	0.55139
			2.488	53.0396		1.0885	0.53074
			2.496	53.3222		1.092	0.53338
			2.504	53.6072		1.0955	0.55764
			2.512	53.889		1.099	0.54869
			2.52	54.1772		1.1025	0.53059
			2.528	54.4611		1.106	0.54999
			2.536	54.7455		1.1095	0.5638
			2.544	55.0381		1.113	0.54268
			2.552	55.3219		1.1165	0.54292
			2.56	55.6097		1.12	0.5717
			2.568	55.9032		1.1235	0.57038
			2.576	56.1885		1.127	0.54978
			2.584	56.4792		1.1305	0.55976
			2.592	56.7724		1.134	0.57315
			2.6	57.0605		1.1375	0.55381
			2.608	57.3525		1.141	0.54922
			2.616	57.6474		1.1445	0.57758
			2.624	57.9379		1.148	0.58436
			2.632	58.2321		1.1515	0.56602
			2.64	58.528		1.155	0.56792
			2.648	58.8217		1.1585	0.58046
			2.656	59.1192		1.162	0.56266
			2.664	59.4168		1.1655	0.55077
			2.672	59.7117		1.169	0.57752
			2.68	60.0104		1.1725	0.59491
			2.688	60.3063		1.176	0.5808
			2.696	60.6056		1.1795	0.57519
			2.704	60.9054		1.183	0.58469
			2.712	61.202		1.1865	0.56886
			2.72	61.5061		1.19	0.55137
			2.728	61.8044		1.1935	0.57636
			2.736	62.1036		1.197	0.60154
			2.744	62.4093		1.2005	0.59074
			2.752	62.7073		1.204	0.58034
			2.76	63.0098		1.2075	0.58814
			2.768	63.3145		1.211	0.57576
			2.776	63.614		1.2145	0.55414
			2.784	63.919		1.218	0.57485
			2.792	64.2247		1.2215	0.60354
			2.8	64.5268		1.225	0.59647
			2.808	64.8329		1.2285	0.58479
			2.816	65.138		1.232	0.5927
			2.824	65.4404		1.2355	0.58351
			2.832	65.7462		1.239	0.55838
			2.84	66.0524		1.2425	0.57186
			2.848	66.3568		1.246	0.60114
			2.856	66.6621		1.2495	0.59975
			2.864	66.9666		1.253	0.58886
			2.872	67.2719		1.2565	0.59528
			2.88	67.5763		1.26	0.58912
			2.888	67.882		1.2635	0.56307
			2.896	68.1892		1.267	0.56826
			2.904	68.4952		1.2705	0.59721
			2.912	68.803		1.274	0.60006
			2.92	69.1127		1.2775	0.58806
			2.928	69.419		1.281	0.59196
			2.936	69.7231		1.2845	0.59113
			2.944	70.0347		1.288	0.5677
			2.952	70.3393		1.2915	0.56468
			2.96	70.6454		1.295	0.59001
			2.968	70.9607		1.2985	0.59504
			2.976	71.2654		1.302	0.58119
			2.984	71.5741		1.3055	0.5844
			2.992	71.8876		1.309	0.59134
			3	72.195		1.3125	0.57161
			3.008	72.5073		1.316	0.56071
			3.016	72.8187		1.3195	0.57912
			3.024	73.1295		1.323	0.58556
			3.032	73.441		1.3265	0.57097
			3.04	73.7524		1.33	0.57431
			3.048	74.0686		1.3335	0.5871
			3.056	74.3794		1.337	0.57134
			3.064	74.6932		1.3405	0.55455
			3.072	75.0099		1.344	0.56767
			3.08	75.3208		1.3475	0.57427
			3.088	75.6368		1.351	0.55779
			3.096	75.9551		1.3545	0.559
			3.104	76.2676		1.358	0.57574
			3.112	76.5824		1.3615	0.56634
			3.12	76.8987		1.365	0.5484
			3.128	77.2128		1.3685	0.55641
			3.136	77.5288		1.372	0.56118
			3.144	77.8471		1.3755	0.54211
			3.152	78.1633		1.379	0.5397
			3.16	78.4702		1.3825	0.55989
			3.168	78.7888		1.386	0.55916
			3.176	79.1139		1.3895	0.54267
			3.184	79.4252		1.393	0.54325
			3.192	79.7448		1.3965	0.5457
			3.2	80.0626		1.4	0.52572
			3.208	80.373		1.4035	0.51898
			3.216	80.6953		1.407	0.54103
			3.224	81.0116		1.4105	0.54839
			3.232	81.3241		1.414	0.53357
			3.24	81.6474		1.4175	0.5284
			3.248	81.9642		1.421	0.53084
			3.256	82.2816		1.4245	0.51217
			3.264	82.6037		1.428	0.49926
			3.272	82.9229		1.4315	0.51978
			3.28	83.2427		1.435	0.53466
			3.288	83.5628		1.4385	0.52271
			3.296	83.8847		1.442	0.51532
			3.304	84.2064		1.4455	0.51861
			3.312	84.5159		1.449	0.50096
			3.32	84.8279		1.4525	0.4805
			3.328	85.1413		1.456	0.4987
			3.336	85.4473		1.4595	0.51928
			3.344	85.7615		1.463	0.51247
			3.352	86.0752		1.4665	0.50505
			3.36	86.3808		1.47	0.50858
			3.368	86.6968		1.4735	0.49215
			3.376	87.0103		1.477	0.46714
			3.384	87.3167		1.4805	0.48292
			3.392	87.6347		1.484	0.50725
			3.4	87.9485		1.484	0.5044
			3.408	88.257		1.4875	0.4968
			3.416	88.5738		1.491	0.50089
			3.424	88.8872		1.4945	0.48957
			3.432	89.1985		1.498	0.46446
			3.44	89.5143		1.5015	0.47388
			3.448	89.8292		1.505	0.49902
			3.456	90.1423		1.5085	0.49955
			3.464	90.458		1.512	0.49327
			3.472	90.7714		1.5155	0.49922
			3.48	91.0879		1.519	0.49489
			3.488	91.4029		1.5225	0.47068
			3.496	91.7185		1.526	0.47167
			3.504	92.0377		1.5295	0.49586
			3.512	92.3508		1.533	0.50091
			3.52	92.6682		1.5365	0.4951
			3.528	92.9903		1.54	0.50216
			3.536	93.303		1.5435	0.50513
			3.544	93.6217		1.547	0.48373
			3.552	93.9437		1.5505	0.4778
			3.56	94.2572		1.554	0.50117
			3.568	94.5782		1.5575	0.5102
			3.576	94.9005		1.561	0.50247
			3.584	95.2151		1.5645	0.50934
			3.592	95.537		1.568	0.5199
			3.6	95.8596		1.5715	0.50498
			3.608	96.1751		1.575	0.49481
			3.616	96.4984		1.5785	0.51517
			3.624	96.8193		1.582	0.52528
			3.632	97.1378		1.5855	0.51478
			3.64	97.4617		1.589	0.52202
			3.648	97.7811		1.5925	0.54063
			3.656	98.1039		1.596	0.53304
			3.664	98.4266		1.5995	0.52018
			3.672	98.7463		1.603	0.53586
			3.68	99.0734		1.6065	0.54583
			3.688	99.3929		1.61	0.53454
			3.696	99.7154		1.6135	0.54064
			3.704	100.046		1.617	0.56417
			3.712	100.363		1.6205	0.56398
			3.72	100.69		1.624	0.5512
			3.728	101.02		1.6275	0.56145
			3.736	101.339		1.631	0.57238
			3.744	101.668		1.6345	0.56075
			3.752	101.998		1.638	0.56221
			3.76	102.319		1.6415	0.58711
			3.768	102.649		1.645	0.59445
			3.776	102.978		1.6485	0.58447
			3.784	103.302		1.652	0.58976
			3.792	103.632		1.6555	0.60075
			3.8	103.961		1.659	0.58798
			3.808	104.288		1.6625	0.58235
			3.816	104.617		1.666	0.608
			3.824	104.947		1.6695	0.62407
			3.832	105.277		1.673	0.61691
			3.84	105.606		1.6765	0.61689
			3.848	105.937		1.68	0.6272
			3.856	106.269		1.6835	0.6149
			3.864	106.598		1.687	0.60244
			3.872	106.93		1.6905	0.62668
			3.88	107.263		1.694	0.64793
			3.888	107.594		1.6975	0.64205
			3.896	107.926		1.701	0.63884
			3.904	108.263		1.7045	0.64982
			3.912	108.595		1.708	0.63938
			3.92	108.927		1.7115	0.62029
			3.928	109.266		1.715	0.64003
			3.936	109.6		1.7185	0.66468
			3.944	109.934		1.722	0.66007
			3.952	110.274		1.7255	0.65572
			3.96	110.607		1.729	0.66689
			3.968	110.943		1.7325	0.65905
			3.976	111.283		1.736	0.63518
			3.984	111.618		1.7395	0.64725
			3.992	111.956		1.743	0.6741
			4	112.294		1.7465	0.67247
			4.008	112.633		1.75	0.66681
			4.016	112.97		1.7535	0.67648
			4.024	113.31		1.757	0.67208
			4.032	113.652		1.7605	0.64623
			4.04	113.989		1.764	0.64994
			4.048	114.33		1.7675	0.67654
			4.056	114.675		1.771	0.67748
			4.064	115.014		1.7745	0.66862
			4.072	115.356		1.778	0.67583
			4.08	115.701		1.7815	0.67699
			4.088	116.042		1.785	0.6526
			4.096	116.386		1.7885	0.64661
			4.104	116.733		1.792	0.67023
			4.112	117.077		1.7955	0.67298
			4.12	117.42		1.799	0.65969
			4.128	117.766		1.8025	0.66609
			4.136	118.112		1.806	0.67435
			4.144	118.455		1.8095	0.65196
			4.152	118.802		1.813	0.63632
			4.16	119.151		1.8165	0.65577
			4.168	119.491		1.82	0.66102
			4.176	119.835		1.8235	0.64343
			4.184	120.18		1.827	0.64783
			4.192	120.52		1.8305	0.66056
			4.2	120.867		1.834	0.64261
			4.208	121.214		1.8375	0.62123
			4.216	121.557		1.841	0.63595
			4.224	121.904		1.8445	0.64209
			4.232	122.252		1.848	0.62023
			4.24	122.597		1.8515	0.62024
			4.248	122.943		1.855	0.63798
			4.256	123.294		1.8585	0.62667
			4.264	123.64		1.862	0.60413
			4.272	123.988		1.8655	0.61198
			4.28	124.34		1.869	0.61835
			4.288	124.687		1.8725	0.59404
			4.296	125.034		1.876	0.58833
			4.304	125.384		1.8795	0.61025
			4.312	125.732		1.883	0.60737
			4.32	126.08		1.8865	0.58546
			4.328	126.429		1.89	0.58594
			4.336	126.781		1.8935	0.59293
			4.344	127.13		1.897	0.56953
			4.352	127.481		1.9005	0.55673
			4.36	127.835		1.904	0.58013
			4.368	128.184		1.9075	0.58645
			4.376	128.537		1.911	0.56623
			4.384	128.892		1.9145	0.56128
			4.392	129.242		1.918	0.56944
			4.4	129.597		1.9215	0.54912
			4.408	129.953		1.925	0.52771
			4.416	130.305		1.9285	0.54985
			4.424	130.661		1.932	0.56562
			4.432	131.016		1.9355	0.54964
			4.44	131.37		1.939	0.54179
			4.448	131.721		1.9425	0.55184
			4.456	132.074		1.946	0.53491
			4.464	132.425		1.9495	0.50536
			4.472	132.774		1.953	0.52483
			4.48	133.13		1.9565	0.5501
			4.488	133.486		1.96	0.539
			4.496	133.838		1.9635	0.52887
			4.504	134.196		1.967	0.54019
			4.512	134.553		1.9705	0.52801
			4.52	134.905		1.974	0.49595
			4.528	135.265		1.9775	0.51105
			4.536	135.622		1.981	0.54209
			4.544	135.977		1.9845	0.5352
			4.552	136.335		1.988	0.52526
			4.56	136.693		1.9915	0.53751
			4.568	137.051		1.995	0.53301
			4.576	137.407		1.9985	0.50117
			4.584	137.768		2.002	0.5083
			4.592	138.128		2.0055	0.54136
			4.6	138.487		2.009	0.54052
			4.608	138.853		2.0125	0.53123
			4.616	139.214		2.016	0.54361
			4.624	139.573		2.0195	0.54668
			4.632	139.94		2.023	0.5187
			4.64	140.301		2.0265	0.51601
			4.648	140.659		2.03	0.54852
			4.656	141.026		2.0335	0.55569
			4.664	141.388		2.037	0.54498
			4.672	141.747		2.0405	0.55612
			4.68	142.114		2.044	0.56669
			4.688	142.477		2.0475	0.54455
			4.696	142.84		2.051	0.53392
			4.704	143.207		2.0545	0.56437
			4.712	143.572		2.058	0.57735
			4.72	143.939		2.0615	0.56334
			4.728	144.305		2.065	0.57202
			4.736	144.672		2.0685	0.59147
			4.744	145.042		2.072	0.57699
			4.752	145.409		2.0755	0.5607
			4.76	145.782		2.079	0.5859
			4.768	146.151		2.0825	0.60189
			4.776	146.517		2.086	0.58556
			4.784	146.893		2.0895	0.59264
			4.792	147.265		2.093	0.61978
			4.8	147.634		2.0965	0.61315
			4.808	148.011		2.1	0.59386
			4.816	148.385		2.1035	0.61144
			4.824	148.756		2.107	0.62981
			4.832	149.132		2.1105	0.61309
			4.84	149.51		2.114	0.61616
			4.848	149.882		2.1175	0.64699
			4.856	150.26		2.121	0.64895
			4.864	150.638		2.1245	0.63023
			4.872	151.012		2.128	0.64052
			4.88	151.39		2.1315	0.65988
			4.888	151.768		2.135	0.64401
			4.896	152.146		2.1385	0.6398
			4.904	152.525		2.142	0.67153
			4.912	152.906		2.1455	0.68385
			4.92	153.288		2.149	0.66812
			4.928	153.668		2.1525	0.67078
			4.936	154.051		2.156	0.68902
			4.944	154.435		2.1595	0.67516
			4.952	154.816		2.163	0.66196
			4.96	155.2		2.1665	0.69277
			4.968	155.585		2.17	0.71471
			4.976	155.968		2.1735	0.70154
			4.984	156.352		2.177	0.69774
			4.992	156.74		2.1805	0.71481
			5	157.123		2.1805	0.70416
			5.008	157.512		2.184	0.68296
			5.016	157.902		2.1875	0.70891
			5.024	158.286		2.191	0.73812
			5.032	158.677		2.1945	0.72837
			5.04	159.068		2.198	0.7193
			5.048	159.456		2.2015	0.73532
			5.056	159.849		2.205	0.72899
			5.064	160.242		2.2085	0.70126
			5.072	160.635		2.212	0.71858
			5.08	161.03		2.2155	0.75146
			5.088	161.425		2.219	0.74606
			5.096	161.821		2.2225	0.73543
			5.104	162.216		2.226	0.74892
			5.112	162.614		2.2295	0.74632
			5.12	163.012		2.233	0.71571
			5.128	163.409		2.2365	0.72256
			5.136	163.807		2.24	0.75652
			5.144	164.21		2.2435	0.75649
			5.152	164.61		2.247	0.74402
			5.16	165.008		2.2505	0.75372
			5.168	165.416		2.254	0.75596
			5.176	165.814		2.2575	0.72677
			5.184	166.218		2.261	0.72343
			5.192	166.625		2.2645	0.75397
			5.2	167.026		2.268	0.75784
			5.208	167.432		2.2715	0.74266
			5.216	167.842		2.275	0.74985
			5.224	168.247		2.2785	0.75826
			5.232	168.656		2.282	0.73318
			5.24	169.068		2.2855	0.71867
			5.248	169.476		2.289	0.74299
			5.256	169.889		2.2925	0.75052
			5.264	170.299		2.296	0.73289
			5.272	170.71		2.2995	0.73682
			5.28	171.125		2.303	0.75127
			5.288	171.536		2.3065	0.73167
			5.296	171.954		2.31	0.70891
			5.304	172.372		2.3135	0.72604
			5.312	172.789		2.317	0.73633
			5.32	173.213		2.3205	0.71643
			5.328	173.631		2.324	0.71581
			5.336	174.051		2.3275	0.73567
			5.344	174.476		2.331	0.72325
			5.352	174.895		2.3345	0.69693
			5.36	175.319		2.338	0.70648
			5.368	175.745		2.3415	0.71778
			5.376	176.168		2.345	0.69546
			5.384	176.594		2.3485	0.69
			5.392	177.018		2.352	0.71363
			5.4	177.444		2.3555	0.71041
			5.408	177.868		2.359	0.68471
			5.416	178.292		2.3625	0.68637
			5.424	178.72		2.366	0.69739
			5.432	179.147		2.3695	0.67469
			5.44	179.57		2.373	0.66338
			5.448	180.003		2.3765	0.68868
			5.456	180.432		2.38	0.69517
			5.464	180.862		2.3835	0.67136
			5.472	181.299		2.387	0.66599
			5.48	181.73		2.3905	0.67599
			5.488	182.161		2.394	0.65632
			5.496	182.601		2.3975	0.6379
			5.504	183.035		2.401	0.6608
			5.512	183.468		2.4045	0.67691
			5.52	183.909		2.408	0.65825
			5.528	184.344		2.4115	0.64778
			5.536	184.782		2.415	0.65795
			5.544	185.22		2.4185	0.64273
			5.552	185.659		2.422	0.61694
			5.56	186.1		2.4255	0.63604
			5.568	186.541		2.429	0.66107
			5.576	186.986		2.4325	0.64923
			5.584	187.429		2.436	0.63536
			5.592	187.875		2.4395	0.64532
			5.6	188.322		2.443	0.63534
			5.608	188.769		2.4465	0.60479
			5.616	189.214		2.45	0.61791
			5.624	189.666		2.4535	0.6499
			5.632	190.112		2.457	0.64434
			5.64	190.56		2.4605	0.62876
			5.648	191.014		2.464	0.63848
			5.656	191.46		2.4675	0.63584
			5.664	191.912		2.471	0.60519
			5.672	192.368		2.4745	0.6102
			5.68	192.818		2.478	0.64458
			5.688	193.276		2.4815	0.64587
			5.696	193.733		2.485	0.63142
			5.704	194.188		2.4885	0.64055
			5.712	194.646		2.492	0.64602
			5.72	195.101		2.4955	0.61772
			5.728	195.563		2.499	0.61358
			5.736	196.022		2.5025	0.64612
			5.744	196.478		2.506	0.65464
			5.752	196.944		2.5095	0.64127
			5.76	197.404		2.513	0.64965
			5.768	197.864		2.5165	0.66169
			5.776	198.334		2.52	0.63996
			5.784	198.795		2.5235	0.62724
			5.792	199.259		2.527	0.65628
			5.8	199.731		2.5305	0.67123
			5.808	200.194		2.534	0.65888
			5.816	200.664		2.5375	0.66489
			5.824	201.135		2.541	0.6838
			5.832	201.599		2.5445	0.67169
			5.84	202.073		2.548	0.65313
			5.848	202.545		2.5515	0.67614
			5.856	203.013		2.555	0.69467
			5.864	203.488		2.5585	0.68205
			5.872	203.959		2.562	0.68535
			5.88	204.433		2.5655	0.71098
			5.888	204.912		2.569	0.7083
			5.896	205.384		2.5725	0.68749
			5.904	205.863		2.576	0.70174
			5.912	206.342		2.5795	0.72243
			5.92	206.817		2.583	0.71001
			5.928	207.301		2.5865	0.71034
			5.936	207.782		2.59	0.74014
			5.944	208.258		2.5935	0.74565
			5.952	208.743		2.597	0.72586
			5.96	209.221		2.6005	0.73264
			5.968	209.703		2.604	0.75397
			5.976	210.191		2.6075	0.74246
			5.984	210.671		2.611	0.7374
			5.992	211.154		2.6145	0.7673
			6	211.64		2.618	0.78123
			6.008	212.122		2.6215	0.76535
			6.016	212.61		2.625	0.76575
			6.024	213.095		2.6285	0.78525
			6.032	213.579		2.632	0.77541
			6.04	214.069		2.6355	0.76316
			6.048	214.554		2.639	0.79072
			6.056	215.042		2.6425	0.8136
			6.064	215.534		2.646	0.80218
			6.072	216.02		2.6495	0.79581
			6.08	216.514		2.653	0.81167
			6.088	217.005		2.6565	0.80593
			6.096	217.494		2.66	0.78702
			6.104	217.993		2.6635	0.8099
			6.112	218.485		2.667	0.83809
			6.12	218.977		2.6705	0.83085
			6.128	219.477		2.674	0.81983
			6.136	219.971		2.6775	0.83386
			6.144	220.467		2.681	0.83275
			6.152	220.968		2.6845	0.80843
			6.16	221.462		2.688	0.82301
			6.168	221.962		2.6915	0.85462
			6.176	222.462		2.695	0.85141
			6.184	222.958		2.6985	0.83824
			6.192	223.459		2.702	0.85088
			6.2	223.959		2.7055	0.85359
			6.208	224.46		2.709	0.82662
			6.216	224.966		2.7125	0.83114
			6.224	225.468		2.716	0.86365
			6.232	225.974		2.7195	0.86426
			6.24	226.481		2.723	0.85008
			6.248	226.982		2.7265	0.85868
			6.256	227.491		2.73	0.86451
			6.264	227.998		2.7335	0.8386
			6.272	228.501		2.737	0.83363
			6.28	229.014		2.7405	0.86343
			6.288	229.518		2.744	0.86773
			6.296	230.025		2.7475	0.85191
			6.304	230.537		2.751	0.85698
			6.312	231.04		2.7545	0.86741
			6.32	231.55		2.758	0.84514
			6.328	232.062		2.7615	0.83132
			6.336	232.567		2.765	0.85462
			6.344	233.083		2.7685	0.86208
			6.352	233.593		2.772	0.84408
			6.36	234.102		2.7755	0.84733
			6.368	234.619		2.779	0.86176
			6.376	235.127		2.7825	0.84514
			6.384	235.641		2.786	0.82292
			6.392	236.154		2.7895	0.83899
			6.4	236.663		2.793	0.85025
			6.408	237.18		2.7965	0.83157
			6.416	237.691		2.8	0.83
			6.424	238.205		2.8035	0.84844
			6.432	238.723		2.807	0.83775
			6.44	239.233		2.8105	0.8114
			6.448	239.749		2.814	0.82134
			6.456	240.266		2.8175	0.83438
			6.464	240.779		2.821	0.81444
			6.472	241.298		2.8245	0.80716
			6.48	241.816		2.828	0.82909
			6.488	242.334		2.8315	0.82587
			6.496	242.857		2.835	0.79943
			6.504	243.378		2.8385	0.80133
			6.512	243.898		2.842	0.81462
			6.52	244.422		2.8455	0.79447
			6.528	244.945		2.849	0.78244
			6.536	245.468		2.8525	0.80504
			6.544	245.992		2.856	0.80975
			6.552	246.518		2.8595	0.78526
			6.56	247.044		2.863	0.77959
			6.568	247.568		2.8665	0.79209
			6.576	248.094		2.87	0.77488
			6.584	248.621		2.8735	0.75746
			6.592	249.146		2.877	0.77865
			6.6	249.675		2.8805	0.79143
			6.608	250.203		2.884	0.7701
			6.616	250.727		2.8875	0.75984
			6.624	251.259		2.891	0.77183
			6.632	251.79		2.8945	0.7602
			6.64	252.316		2.898	0.73566
			6.648	252.849		2.9015	0.75257
			6.656	253.382		2.905	0.77304
			6.664	253.911		2.9085	0.75777
			6.672	254.448		2.912	0.74456
			6.68	254.982		2.9155	0.75648
			6.688	255.515		2.919	0.74988
			6.696	256.051		2.9225	0.72073
			6.704	256.584		2.926	0.73249
			6.712	257.122		2.9295	0.76029
			6.72	257.656		2.933	0.75146
			6.728	258.191		2.9365	0.73589
			6.736	258.732		2.94	0.74768
			6.744	259.266		2.9435	0.74723
			6.752	259.804		2.947	0.71775
			6.76	260.346		2.9505	0.72299
			6.768	260.879		2.954	0.75534
			6.776	261.419		2.9575	0.75227
			6.784	261.964		2.961	0.73606
			6.792	262.501		2.9645	0.74737
			6.8	263.045		2.968	0.75449
			6.808	263.59		2.9715	0.72782
			6.816	264.131		2.975	0.72494
			6.824	264.679		2.9785	0.75738
			6.832	265.223		2.982	0.76141
			6.84	265.768		2.9855	0.74542
			6.848	266.316		2.989	0.75504
			6.856	266.861		2.9925	0.76852
			6.864	267.411		2.996	0.74661
			6.872	267.959		2.9995	0.73615
			6.88	268.507		3.003	0.76582
			6.888	269.058		3.0065	0.77736
			6.896	269.605		3.01	0.76161
			6.904	270.155		3.0135	0.7683
			6.912	270.709		3.017	0.78732
			6.92	271.259		3.0205	0.77304
			6.928	271.812		3.024	0.7567
			6.936	272.366		3.0275	0.78177
			6.944	272.919		3.031	0.80044
			6.952	273.474		3.0345	0.78423
			6.96	274.03		3.038	0.78651
			6.968	274.585		3.0415	0.81095
			6.976	275.139		3.045	0.80635
			6.984	275.695		3.0485	0.78585
			6.992	276.253		3.052	0.80433
			7	276.808		3.0555	0.82628
			7.008	277.364		3.059	0.81163
			7.016	277.923		3.0625	0.80903
			7.024	278.48		3.066	0.83759
			7.032	279.039		3.0695	0.84024
			7.04	279.601		3.073	0.81784
			7.048	280.164		3.0765	0.82817
			7.056	280.728		3.08	0.85298
			7.064	281.292		3.0835	0.84117
			7.072	281.858		3.087	0.833
			7.08	282.424		3.0905	0.86126
			7.088	282.989		3.094	0.8717
			7.096	283.558		3.0975	0.8511
			7.104	284.123		3.101	0.85409
			7.112	284.69		3.1045	0.87911
			7.12	285.258		3.108	0.86994
			7.128	285.821		3.1115	0.85611
			7.136	286.39		3.115	0.8812
			7.144	286.958		3.1185	0.89948
			7.152	287.525		3.122	0.88216
			7.16	288.093		3.1255	0.87829
			7.168	288.661		3.129	0.89979
			7.176	289.231		3.1325	0.89526
			7.184	289.801		3.136	0.87606
			7.192	290.371		3.1395	0.89646
			7.2	290.942		3.143	0.92089
			7.208	291.512		3.1465	0.9074
			7.216	292.084		3.15	0.89661
			7.224	292.657		3.1535	0.91564
			7.232	293.229		3.157	0.91655
			7.24	293.804		3.1605	0.8936
			7.248	294.381		3.164	0.90677
			7.256	294.954		3.1675	0.93472
			7.264	295.53		3.171	0.92561
			7.272	296.109		3.1745	0.90912
			7.28	296.685		3.178	0.92578
			7.288	297.262		3.1815	0.93183
			7.296	297.842		3.185	0.90696
			7.304	298.421		3.1885	0.91064
			7.312	298.997		3.192	0.94039
			7.32	299.579		3.1955	0.93632
			7.328	300.16		3.199	0.9172
			7.336	300.738		3.2025	0.92954
			7.344	301.322		3.206	0.93905
			7.352	301.894		3.2095	0.91435
			7.36	302.466		3.213	0.91005
			7.368	303.044		3.2165	0.93827
			7.376	303.618		3.22	0.939
			7.384	304.19		3.2235	0.91768
			7.392	304.767		3.227	0.92498
			7.4	305.344		3.2305	0.93853
			7.408	305.917		3.234	0.91726
			7.416	306.496		3.2375	0.90583
			7.424	307.075		3.241	0.92977
			7.432	307.65		3.2445	0.93489
			7.44	308.232		3.248	0.91226
			7.448	308.812		3.2515	0.91434
			7.456	309.388		3.255	0.93156
			7.464	309.97		3.2585	0.91554
			7.472	310.548		3.262	0.89728
			7.48	311.128		3.2655	0.91552
			7.488	311.709		3.269	0.92623
			7.496	312.29		3.2725	0.90376
			7.504	312.871		3.276	0.90033
			7.512	313.449		3.2795	0.92029
			7.52	314.032		3.283	0.9103
			7.528	314.616		3.2865	0.8864
			7.536	315.197		3.29	0.89924
			7.544	315.782		3.2935	0.91469
			7.552	316.371		3.297	0.89408
			7.56	316.949		3.3005	0.88359
			7.568	317.536		3.304	0.90511
			7.576	318.125		3.3075	0.90233
			7.584	318.704		3.311	0.87598
			7.592	319.293		3.3145	0.88307
			7.6	319.883		3.318	0.90215
			7.608	320.469		3.3215	0.88464
			7.616	321.059		3.325	0.86847
			7.624	321.65		3.3285	0.89048
			7.632	322.24		3.332	0.89554
			7.64	322.83		3.3355	0.86929
			7.648	323.426		3.339	0.86921
			7.656	324.019		3.3425	0.8897
			7.664	324.611		3.346	0.87662
			7.672	325.207		3.3495	0.85719
			7.68	325.803		3.353	0.87694
			7.688	326.399		3.3565	0.88985
			7.696	326.994		3.36	0.86503
			7.704	327.594		3.3635	0.85782
			7.712	328.192		3.367	0.87819
			7.72	328.788		3.3705	0.87185
			7.728	329.392		3.374	0.84925
			7.736	329.988		3.3775	0.86401
			7.744	330.588		3.381	0.88306
			7.752	331.192		3.3845	0.86318
			7.76	331.789		3.388	0.84938
			7.768	332.391		3.3915	0.8687
			7.776	332.995		3.395	0.86978
			7.784	333.595		3.3985	0.8448
			7.792	334.198		3.402	0.85347
			7.8	334.802		3.4055	0.87921
			7.808	335.402		3.409	0.8665
			7.816	336.004		3.4125	0.84655
			7.824	336.607		3.416	0.86349
			7.832	337.211		3.4195	0.87118
			7.84	337.815		3.423	0.84617
			7.848	338.416		3.4265	0.84848
			7.856	339.026		3.43	0.8796
			7.864	339.63		3.4335	0.87456
			7.872	340.234		3.437	0.84961
			7.88	340.848		3.4405	0.86294
			7.888	341.451		3.444	0.87713
			7.896	342.058		3.4475	0.85415
			7.904	342.667		3.451	0.85005
			7.912	343.286		3.4545	0.88284
			7.92	343.898		3.458	0.88534
			7.928	344.499		3.4615	0.85966
			7.936	345.099		3.465	0.86834
			7.944	345.7		3.4685	0.88911
			7.952	346.302		3.472	0.86991
			7.96	346.908		3.4755	0.85939
			7.968	347.509		3.479	0.88982
			7.976	348.112		3.4825	0.90106
			7.984	348.719		3.486	0.87779
			7.992	349.323		3.4895	0.87964
			8	349.929		3.493	0.90275
			8.008	350.538		3.4965	0.89012
			8.016	351.145		3.5	0.8731
			8.024	351.752		3.5035	0.89941
			8.032	352.364		3.507	0.91841
			8.04	352.971		3.5105	0.89751
			8.048	353.583		3.514	0.89173
			8.056	354.194		3.5175	0.91622
			8.064	354.803		3.521	0.91217
			8.072	355.417		3.5245	0.88973
			8.08	356.031		3.528	0.90908
			8.088	356.645		3.5315	0.93408
			8.096	357.26		3.535	0.9178
			8.104	357.877		3.5385	0.90538
			8.112	358.49		3.542	0.93058
			8.12	359.106		3.5455	0.93506
			8.128	359.723		3.549	0.90843
			8.136	360.334		3.5525	0.91816
			8.144	360.952		3.556	0.94804
			8.152	361.568		3.5595	0.93708
			8.16	362.18		3.563	0.92005
			8.168	362.8		3.5665	0.94512
			8.176	363.418		3.57	0.95653
			8.184	364.035		3.5735	0.92879
			8.192	364.654		3.577	0.92881
			8.2	365.271		3.5805	0.96035
			8.208	365.891		3.584	0.95447
			8.216	366.506		3.5875	0.93397
			8.224	367.127		3.591	0.95525
			8.232	367.751		3.5945	0.97292
			8.24	368.364		3.598	0.94785
			8.248	368.991		3.6015	0.93966
			8.256	369.615		3.605	0.96887
			8.264	370.229		3.6085	0.96886
			8.272	370.859		3.612	0.94577
			8.28	371.484		3.6155	0.96163
			8.288	372.102		3.619	0.98542
			8.296	372.737		3.6225	0.96586
			8.304	373.361		3.626	0.94889
			8.312	373.983		3.6295	0.97134
			8.32	374.617		3.633	0.9774
			8.328	375.242		3.6365	0.95374
			8.336	375.869		3.64	0.96309
			8.344	376.499		3.6435	0.99046
			8.352	377.126		3.647	0.97696
			8.36	377.759		3.6505	0.9526
			8.368	378.384		3.654	0.96998
			8.376	379.016		3.6575	0.9826
			8.384	379.649		3.661	0.95782
			8.392	380.27		3.6645	0.95828
			8.4	380.907		3.668	0.98848
			8.408	381.538		3.6715	0.98297
			8.416	382.161		3.675	0.95392
			8.424	382.803		3.6785	0.96544
			8.432	383.432		3.682	0.98298
			8.44	384.057		3.6855	0.95944
			8.448	384.7		3.689	0.95222
			8.456	385.329		3.6925	0.9841
			8.464	385.959		3.696	0.9857
			8.472	386.598		3.6995	0.95607
			8.48	387.227		3.703	0.96071
			8.488	387.859		3.7065	0.98184
			8.496	388.494		3.71	0.96047
			8.504	389.127		3.7135	0.94648
			8.512	389.765		3.717	0.97641
			8.52	390.399		3.7205	0.98571
			8.528	391.04		3.724	0.95753
			8.536	391.682		3.7275	0.95613
			8.544	392.312		3.731	0.97895
			8.552	392.958		3.7345	0.96402
			8.56	393.598		3.738	0.94388
			8.568	394.225		3.7415	0.96856
			8.576	394.877		3.745	0.98544
			8.584	395.516		3.7485	0.9609
			8.592	396.147		3.752	0.95423
			8.6	396.799		3.7555	0.97773
			8.608	397.437		3.759	0.97109
			8.616	398.075		3.7625	0.94397
			8.624	398.725		3.766	0.95992
			8.632	399.367		3.7695	0.98334
			8.64	400.012		3.773	0.96503
			8.648	400.659		3.7765	0.95215
			8.656	401.306		3.78	0.97547
			8.664	401.955		3.7835	0.97673
			8.672	402.601		3.787	0.946
			8.68	403.254		3.7905	0.95339
			8.688	403.908		3.794	0.98181
			8.696	404.553		3.7975	0.96866
			8.704	405.214		3.801	0.94975
			8.712	405.869		3.8045	0.97276
			8.72	406.515		3.808	0.98263
			8.728	407.179		3.8115	0.952
			8.736	407.834		3.815	0.9498
			8.744	408.485		3.8185	0.97982
			8.752	409.151		3.822	0.97186
			8.76	409.807		3.8255	0.95093
			8.768	410.46		3.829	0.97244
			8.776	411.125		3.8325	0.98946
			8.784	411.784		3.836	0.96122
			8.792	412.443		3.8395	0.95015
			8.8	413.105		3.843	0.97891
			8.808	413.765		3.8465	0.97728
			8.816	414.423		3.85	0.95445
			8.824	415.081		3.8535	0.97163
			8.832	415.746		3.857	0.99514
			8.84	416.405		3.8605	0.97366
			8.848	417.063		3.864	0.956
			8.856	417.733		3.8675	0.97978
			8.864	418.393		3.871	0.98622
			8.872	419.054		3.8745	0.96244
			8.88	419.725		3.878	0.97391
			8.888	420.386		3.8815	1.00265
			8.896	421.049		3.885	0.99029
			8.904	421.721		3.8885	0.96766
			8.912	422.386		3.892	0.98585
			8.92	423.051		3.8955	0.99848
			8.928	423.723		3.899	0.97406
			8.936	424.391		3.9025	0.97842
			8.944	425.06		3.906	1.01174
			8.952	425.73		3.9095	1.0098
			8.96	426.405		3.913	0.98309
			8.968	427.072		3.9165	0.99495
			8.976	427.741		3.92	1.01303
			8.984	428.415		3.9235	0.99021
			8.992	429.082		3.927	0.9866
			9	429.752		3.9305	1.02291
			9.008	430.427		3.934	1.02883
			9.016	431.092		3.9375	1.00105
			9.024	431.763		3.941	1.00704
			9.032	432.437		3.9445	1.03019
			9.04	433.105		3.948	1.0106
			9.048	433.778		3.9515	0.99861
			9.056	434.451		3.955	1.03333
			9.064	435.124		3.9585	1.04771
			9.072	435.798		3.962	1.02328
			9.08	436.471		3.9655	1.02357
			9.088	437.15		3.969	1.04897
			9.096	437.822		3.9725	1.03434
			9.104	438.496		3.976	1.01614
			9.112	439.177		3.9795	1.04544
			9.12	439.848		3.983	1.06804
			9.128	440.524		3.9865	1.04797
			9.136	441.208		3.99	1.04242
			9.144	441.882		3.9935	1.06689
			9.152	442.56		3.997	1.06049
			9.16	443.248		4.0005	1.03559
			9.168	443.926		4.004	1.05616
			9.176	444.608		4.0075	1.08366
			9.184	445.292		4.011	1.06905
			9.192	445.972		4.0145	1.05705
			9.2	446.655		4.018	1.08087
			9.208	447.34		4.0215	1.08452
			9.216	448.025		4.025	1.0561
			9.224	448.706		4.0285	1.06616
			9.232	449.392		4.032	1.09731
			9.24	450.081		4.0355	1.08801
			9.248	450.762		4.039	1.0705
			9.256	451.451		4.0425	1.09316
			9.264	452.143		4.046	1.10523
			9.272	452.828		4.0495	1.07587
			9.28	453.52		4.053	1.07338
			9.288	454.212		4.0565	1.10596
			9.296	454.902		4.06	1.10263
			9.304	455.595		4.0635	1.08188
			9.312	456.292		4.067	1.10092
			9.32	456.988		4.0705	1.11957
			9.328	457.682		4.074	1.09364
			9.336	458.379		4.0775	1.08107
			9.344	459.072		4.081	1.11088
			9.352	459.761		4.0845	1.11262
			9.36	460.451		4.088	1.0894
			9.368	461.145		4.0915	1.10327
			9.376	461.836		4.095	1.12773
			9.384	462.533		4.0985	1.10814
			9.392	463.228		4.102	1.08793
			9.4	463.921		4.1055	1.11071
			9.408	464.62		4.109	1.11814
			9.416	465.316		4.1125	1.09389
			9.424	466.013		4.116	1.10234
			9.432	466.714		4.1195	1.13069
			9.44	467.412		4.123	1.1192
			9.448	468.116		4.1265	1.09365
			9.456	468.821		4.13	1.10857
			9.464	469.522		4.1335	1.12245
			9.472	470.23		4.137	1.09929
			9.48	470.934		4.1405	1.10047
			9.488	471.635		4.144	1.13046
			9.496	472.342		4.1475	1.12857
			9.504	473.043		4.151	1.1005
			9.512	473.747		4.1545	1.10712
			9.52	474.452		4.158	1.12577
			9.528	475.16		4.1615	1.10535
			9.536	475.867		4.165	1.09805
			9.544	476.572		4.1685	1.12838
			9.552	477.283		4.172	1.13477
			9.56	477.991		4.1755	1.10644
			9.568	478.696		4.179	1.10632
			9.576	479.407		4.1825	1.1278
			9.584	480.119		4.186	1.1106
			9.592	480.824		4.1895	1.09485
			9.6	481.529		4.193	1.12365
			9.608	482.246		4.1965	1.13726
			9.616	482.951		4.2	1.11166
			9.624	483.658		4.2035	1.10542
			9.632	484.38		4.207	1.12824
			9.64	485.084		4.2105	1.11668
			9.648	485.796		4.214	1.09605
			9.656	486.515		4.2175	1.11979
			9.664	487.224		4.221	1.13919
			9.672	487.943		4.2245	1.1179
			9.68	488.659		4.228	1.10744
			9.688	489.38		4.2315	1.13027
			9.696	490.099		4.235	1.12629
			9.704	490.812		4.2385	1.10153
			9.712	491.545		4.242	1.11677
			9.72	492.262		4.2455	1.14147
			9.728	492.979		4.249	1.12649
			9.736	493.717		4.2525	1.11217
			9.744	494.432		4.256	1.13359
			9.752	495.157		4.2595	1.1383
			9.76	495.898		4.263	1.11128
			9.768	496.62		4.2665	1.11664
			9.776	497.352		4.27	1.14441
			9.784	498.09		4.2735	1.13636
			9.792	498.823		4.277	1.11794
			9.8	499.557		4.2805	1.13735
			9.808	500.291		4.284	1.15021
			9.816	501.031		4.2875	1.12377
			9.824	501.76		4.291	1.11971
			9.832	502.497		4.2945	1.14879
			9.84	503.241		4.298	1.14644
			9.848	503.97		4.3015	1.12454
			9.856	504.712		4.305	1.14252
			9.864	505.455		4.3085	1.16333
			9.872	506.19		4.312	1.13983
			9.88	506.931		4.3155	1.12644
			9.888	507.673		4.319	1.15393
			9.896	508.417		4.3225	1.15796
			9.904	509.161		4.326	1.13512
			9.912	509.909		4.3295	1.14944
			9.92	510.656		4.333	1.17669
			9.928	511.394		4.3365	1.15897
			9.936	512.144		4.34	1.13893
			9.944	512.89		4.3435	1.16188
			9.952	513.627		4.347	1.17178
			9.96	514.379		4.3505	1.14941
			9.968	515.127		4.354	1.15825
			9.976	515.86		4.3575	1.18868
			9.984	516.606		4.361	1.17881
			9.992	517.348		4.3645	1.15439
			10	518.085		4.368	1.17087
			10.008	518.831		4.3715	1.18729
			10.016	519.574		4.375	1.16671
			10.024	520.316		4.3785	1.16798
			10.032	521.063		4.382	1.20011
			10.04	521.809		4.3855	1.20042
			10.048	522.556		4.389	1.1736
			10.056	523.298		4.3925	1.18201
			10.064	524.048		4.396	1.20336
			10.072	524.8		4.3995	1.18656
			10.08	525.54		4.403	1.17989
			10.088	526.295		4.4065	1.21272
			10.096	527.051		4.41	1.22311
			10.104	527.795		4.4135	1.19636
			10.112	528.551		4.417	1.19696
			10.12	529.309		4.4205	1.22237
			10.128	530.057		4.424	1.21067
			10.136	530.814		4.4275	1.19628
			10.144	531.569		4.431	1.22632
			10.152	532.324		4.4345	1.24556
			10.16	533.08		4.438	1.22128
			10.168	533.837		4.4415	1.21506
			10.176	534.598		4.445	1.24291
			10.184	535.357		4.4485	1.23814
			10.192	536.116		4.452	1.21721
			10.2	536.881		4.4555	1.24084
			10.208	537.641		4.459	1.26675
			10.216	538.403		4.4625	1.24745
			10.224	539.169		4.466	1.23592
			10.232	539.929		4.4695	1.26212
			10.24	540.695		4.473	1.2641
			10.248	541.459		4.4765	1.23948
			10.256	542.22		4.48	1.25437
			10.264	542.991		4.4835	1.28369
			10.272	543.756		4.487	1.27141
			10.28	544.524		4.4905	1.25427
			10.288	545.301		4.494	1.27641
			10.296	546.068		4.4975	1.28697
			10.304	546.843		4.501	1.2625
			10.312	547.619		4.5045	1.26645
			10.32	548.391		4.508	1.29625
			10.328	549.17		4.5115	1.29165
			10.336	549.945		4.515	1.2717
			10.344	550.718		4.5185	1.28957
			10.352	551.498		4.522	1.30782
			10.36	552.275		4.5255	1.28479
			10.368	553.053		4.529	1.27642
			10.376	553.838		4.5325	1.30493
			10.384	554.611		4.536	1.30742
			10.392	555.396		4.5395	1.28509
			10.4	556.186		4.543	1.29679
			10.408	556.962		4.5465	1.32122
			10.416	557.754		4.55	1.30149
			10.424	558.539		4.5535	1.28308
			10.432	559.318		4.557	1.30769
			10.44	560.117		4.5605	1.31618
			10.448	560.899		4.564	1.2924
			10.456	561.684		4.5675	1.29854
			10.464	562.471		4.571	1.32685
			10.472	563.249		4.5745	1.31299
			10.48	564.027		4.578	1.2873
			10.488	564.813		4.5815	1.30581
			10.496	565.591		4.585	1.31903
			10.504	566.378		4.5885	1.29589
			10.512	567.17		4.592	1.29697
			10.52	567.952		4.5955	1.32602
			10.528	568.749		4.599	1.31968
			10.536	569.538		4.6025	1.29088
			10.544	570.327		4.606	1.30094
			10.552	571.129		4.6095	1.3177
			10.56	571.917		4.613	1.29749
			10.568	572.714		4.6165	1.2926
			10.576	573.516		4.62	1.31988
			10.584	574.303		4.6235	1.32168
			10.592	575.106		4.627	1.29176
			10.6	575.906		4.6305	1.29345
			10.608	576.697		4.634	1.31337
			10.616	577.502		4.6375	1.29817
			10.624	578.3		4.641	1.2864
			10.632	579.098		4.6445	1.31038
			10.64	579.907		4.648	1.32065
			10.648	580.706		4.6515	1.29293
			10.656	581.51		4.655	1.28582
			10.664	582.323		4.6585	1.30827
			10.672	583.126		4.662	1.29928
			10.68	583.939		4.6655	1.28087
			10.688	584.752		4.669	1.30132
			10.696	585.556		4.6725	1.31867
			10.704	586.375		4.676	1.29462
			10.712	587.184		4.6795	1.28063
			10.72	587.992		4.683	1.30467
			10.728	588.814		4.6865	1.30221
			10.736	589.62		4.69	1.28016
			10.744	590.442		4.6935	1.29544
			10.752	591.269		4.697	1.31756
			10.76	592.079		4.7005	1.29872
			10.768	592.9		4.704	1.28212
			10.776	593.726		4.7075	1.30586
			10.784	594.542		4.711	1.31059
			10.792	595.368		4.7145	1.28781
			10.8	596.191		4.718	1.29641
			10.808	597.007		4.7215	1.32062
			10.816	597.835		4.725	1.30796
			10.824	598.656		4.7285	1.29122
			10.832	599.479		4.732	1.31124
			10.84	600.309		4.7355	1.32376
			10.848	601.137		4.739	1.30241
			10.856	601.971		4.7425	1.30263
			10.864	602.804		4.746	1.32671
			10.872	603.636		4.7495	1.3219
			10.88	604.478		4.753	1.3045
			10.888	605.312		4.7565	1.32091
			10.896	606.15		4.76	1.34033
			10.904	606.993		4.7635	1.32287
			10.912	607.829		4.767	1.31414
			10.92	608.673		4.7705	1.33726
			10.928	609.522		4.774	1.34004
			10.936	610.361		4.7775	1.32123
			10.944	611.207		4.781	1.33372
			10.952	612.056		4.7845	1.35842
			10.96	612.899		4.788	1.34627
			10.968	613.753		4.7915	1.33063
			10.976	614.607		4.795	1.3515
			10.984	615.453		4.7985	1.35935
			10.992	616.311		4.802	1.34095
			11	617.167		4.8055	1.35029
			11.008	618.022		4.809	1.37954
			11.016	618.882		4.8125	1.3719
			11.024	619.742		4.816	1.35213
			11.032	620.597		4.8195	1.36871
			11.04	621.457		4.823	1.38132
			11.048	622.313		4.8265	1.36331
			11.056	623.169		4.83	1.36879
			11.064	624.04		4.8335	1.39798
			11.072	624.9		4.837	1.39623
			11.08	625.761		4.8405	1.37461
			11.088	626.633		4.844	1.38507
			11.096	627.495		4.8475	1.40191
			11.104	628.361		4.851	1.38656
			11.112	629.229		4.8545	1.38645
			11.12	630.096		4.858	1.41363
			11.128	630.965		4.8615	1.41801
			11.136	631.829		4.865	1.39637
			11.144	632.702		4.8685	1.39995
			11.152	633.574		4.872	1.41958
			11.16	634.438		4.8755	1.40874
			11.168	635.313		4.879	1.40202
			11.176	636.192		4.8825	1.42666
			11.184	637.061		4.886	1.43712
			11.192	637.943		4.8895	1.4175
			11.2	638.822		4.893	1.41553
			11.208	639.698		4.8965	1.43744
			11.216	640.585		4.9	1.4322
			11.224	641.46		4.9035	1.41907
			11.232	642.34		4.907	1.44036
			11.24	643.227		4.9105	1.45638
			11.248	644.104		4.914	1.43829
			11.256	644.989		4.9175	1.43125
			11.264	645.869		4.921	1.45421
			11.272	646.751		4.9245	1.45462
			11.28	647.637		4.928	1.43752
			11.288	648.518		4.9315	1.45293
			11.296	649.411		4.935	1.47188
			11.304	650.296		4.9385	1.45681
			11.312	651.174		4.942	1.446
			11.32	652.066		4.9455	1.46808
			11.328	652.954		4.949	1.47331
			11.336	653.832		4.9525	1.45433
			11.344	654.723		4.956	1.46257
			11.352	655.611		4.9595	1.48245
			11.36	656.495		4.963	1.47082
			11.368	657.382		4.9665	1.45803
			11.376	658.26		4.97	1.47624
			11.384	659.141		4.9735	1.48606
			11.392	660.032		4.977	1.46705
			11.4	660.915		4.9805	1.46818
			11.408	661.801		4.984	1.48703
			11.416	662.691		4.9875	1.47925
			11.424	663.581		4.991	1.46402
			11.432	664.47		4.9945	1.4776
			11.44	665.347		4.998	1.49179
			11.448	666.225		5.0015	1.47533
			11.456	667.108		5.005	1.46796
			11.464	667.982		5.0085	1.48563
			11.472	668.865		5.012	1.48328
			11.48	669.747		5.0155	1.46502
			11.488	670.625		5.019	1.47433
			11.496	671.513		5.0225	1.49231
			11.504	672.394		5.026	1.47924
			11.512	673.273		5.0295	1.46456
			11.52	674.164		5.033	1.48038
			11.528	675.05		5.0365	1.48323
			11.536	675.937		5.04	1.46299
			11.544	676.819		5.0435	1.46841
			11.552	677.703		5.047	1.48852
			11.56	678.592		5.0505	1.47826
			11.568	679.479		5.054	1.45907
			11.576	680.366		5.0575	1.47123
			11.584	681.261		5.061	1.47837
			11.592	682.149		5.0645	1.45861
			11.6	683.037		5.068	1.46045
			11.608	683.929		5.0715	1.4806
			11.616	684.819		5.075	1.4731
			11.624	685.708		5.0785	1.45251
			11.632	686.6		5.082	1.46036
			11.64	687.492		5.0855	1.4711
			11.648	688.386		5.089	1.45356
			11.656	689.28		5.0925	1.45091
			11.664	690.171		5.096	1.46982
			11.672	691.069		5.0995	1.46661
			11.68	691.96		5.103	1.44579
			11.688	692.852		5.1065	1.44821
			11.696	693.748		5.11	1.46115
			11.704	694.64		5.1135	1.44887
			11.712	695.536		5.117	1.44137
			11.72	696.432		5.1205	1.45846
			11.728	697.329		5.124	1.46054
			11.736	698.225		5.1275	1.44058
			11.744	699.121		5.131	1.43729
			11.752	700.017		5.1345	1.45281
			11.76	700.914		5.138	1.44712
			11.768	701.81		5.1415	1.43572
			11.776	702.707		5.145	1.45086
			11.784	703.61		5.1485	1.45851
			11.792	704.506		5.152	1.4405
			11.8	705.407		5.1555	1.43352
			11.808	706.31		5.159	1.45165
			11.816	707.209		5.1625	1.45201
			11.824	708.112		5.166	1.43928
			11.832	709.013		5.1695	1.45019
			11.84	709.914		5.173	1.46263
			11.848	710.817		5.1765	1.44782
			11.856	711.717		5.18	1.43873
			11.864	712.624		5.1835	1.45721
			11.872	713.526		5.187	1.463
			11.88	714.425		5.1905	1.44947
			11.888	715.328		5.194	1.45648
			11.896	716.222		5.1975	1.47164
			11.904	717.126		5.201	1.46146
			11.912	718.025		5.2045	1.45148
			11.92	718.926		5.208	1.46778
			11.928	719.833		5.2115	1.47871
			11.936	720.728		5.215	1.46727
			11.944	721.633		5.2185	1.46998
			11.952	722.537		5.222	1.48591
			11.96	723.437		5.2255	1.48093
			11.968	724.345		5.229	1.46993
			11.976	725.248		5.2325	1.48418
			11.984	726.149		5.236	1.49903
			11.992	727.057		5.2395	1.4903
			12	727.957		5.243	1.48848
			12.008	728.858		5.2465	1.50407
			12.016	729.767		5.25	1.50487
			12.024	730.668		5.2535	1.49331
			12.032	731.577		5.257	1.50489
			12.04	732.489		5.2605	1.5225
			12.048	733.391		5.264	1.51637
			12.056	734.308		5.2675	1.50999
			12.064	735.215		5.271	1.52538
			12.072	736.124		5.2745	1.53247
			12.08	737.043		5.278	1.52136
			12.088	737.945		5.2815	1.52944
			12.096	738.861		5.285	1.54953
			12.104	739.778		5.2885	1.54576
			12.112	740.686		5.292	1.53572
			12.12	741.605		5.2955	1.55006
			12.128	742.52		5.299	1.56206
			12.136	743.43		5.3025	1.55183
			12.144	744.351		5.306	1.55581
			12.152	745.268		5.3095	1.57695
			12.16	746.182		5.313	1.57447
			12.168	747.108		5.3165	1.5618
			12.176	748.023		5.32	1.57323
			12.184	748.936		5.3235	1.58776
			12.192	749.861		5.327	1.57937
			12.2	750.771		5.3305	1.58088
			12.208	751.692		5.334	1.60026
			12.216	752.617		5.3375	1.60008
			12.224	753.533		5.341	1.58528
			12.232	754.459		5.3445	1.59328
			12.24	755.353		5.348	1.61042
			12.248	756.254		5.3515	1.60566
			12.256	757.164		5.355	1.6027
			12.264	758.06		5.3585	1.62018
			12.272	758.966		5.362	1.62287
			12.28	759.872		5.3655	1.60576
			12.288	760.766		5.369	1.609
			12.296	761.673		5.3725	1.62828
			12.304	762.586		5.376	1.62808
			12.312	763.482		5.3795	1.62091
			12.32	764.393		5.383	1.63464
			12.328	765.302		5.3865	1.64092
			12.336	766.198		5.39	1.62345
			12.344	767.116		5.3935	1.6199
			12.352	768.021		5.397	1.64015
			12.36	768.927		5.4005	1.64367
			12.368	769.842		5.404	1.63227
			12.376	770.749		5.4075	1.64269
			12.384	771.66		5.411	1.65366
			12.392	772.57		5.4145	1.63618
			12.4	773.476		5.418	1.6273
			12.408	774.389		5.4215	1.64769
			12.416	775.296		5.425	1.65421
			12.424	776.204		5.4285	1.63995
			12.432	777.117		5.432	1.64667
			12.44	778.027		5.4355	1.66124
			12.448	778.931		5.439	1.64511
			12.456	779.852		5.4425	1.63254
			12.464	780.764		5.446	1.65084
			12.472	781.672		5.4495	1.65967
			12.48	782.599		5.453	1.64419
			12.488	783.507		5.4565	1.64745
			12.496	784.425		5.46	1.66386
			12.504	785.352		5.4635	1.65155
			12.512	786.26		5.467	1.63519
			12.52	787.182		5.4705	1.65077
			12.528	788.106		5.474	1.66242
			12.536	789.017		5.4775	1.64718
			12.544	789.944		5.481	1.64495
			12.552	790.865		5.4845	1.66096
			12.56	791.78		5.488	1.65529
			12.568	792.71		5.4915	1.63707
			12.576	793.627		5.495	1.64615
			12.584	794.556		5.4985	1.65962
			12.592	795.488		5.502	1.64519
			12.6	796.401		5.5055	1.63663
			12.608	797.321		5.509	1.65238
			12.616	798.202		5.5125	1.65494
			12.624	799.077		5.516	1.63462
			12.632	799.971		5.5195	1.63649
			12.64	800.828		5.523	1.6522
			12.648	801.706		5.5265	1.63929
			12.656	802.591		5.53	1.62393
			12.664	803.456		5.5335	1.63865
			12.672	804.341		5.537	1.64708
			12.68	805.22		5.5405	1.62735
			12.688	806.085		5.544	1.62403
			12.696	806.968		5.5475	1.64138
			12.704	807.849		5.551	1.63061
			12.712	808.726		5.5545	1.60862
			12.72	809.602		5.558	1.62086
			12.728	810.484		5.5615	1.63519
			12.736	811.368		5.565	1.61759
			12.744	812.244		5.5685	1.61163
			12.752	813.123		5.572	1.62889
			12.76	814.005		5.5755	1.62064
			12.768	814.878		5.579	1.59615
			12.776	815.754		5.5825	1.6046
			12.784	816.641		5.586	1.62254
			12.792	817.522		5.5895	1.61037
			12.8	818.405		5.593	1.60222
			12.808	819.292		5.5965	1.61704
			12.816	820.178		5.6	1.61432
			12.824	821.056		5.6035	1.58981
			12.832	821.946		5.607	1.59288
			12.84	822.831		5.6105	1.61332
			12.848	823.711		5.614	1.60872
			12.856	824.604		5.6175	1.5982
			12.864	825.487		5.621	1.61068
			12.872	826.374		5.6245	1.61507
			12.88	827.267		5.628	1.59298
			12.888	828.146		5.6315	1.58775
			12.896	829.036		5.635	1.60997
			12.904	829.919		5.6385	1.61303
			12.912	830.802		5.642	1.60071
			12.92	831.691		5.6455	1.6112
			12.928	832.57		5.649	1.62257
			12.936	833.453		5.6525	1.60235
			12.944	834.333		5.656	1.5911
			12.952	835.217		5.6595	1.61446
			12.96	836.106		5.663	1.62332
			12.968	836.994		5.6665	1.60944
			12.976	837.877		5.67	1.61784
			12.984	838.765		5.6735	1.63515
			12.992	839.655		5.677	1.61947
			13	840.539		5.6805	1.60558
			13.008	841.427		5.684	1.62794
			13.016	842.312		5.6875	1.64023
			13.024	843.185		5.691	1.62605
			13.032	844.029		5.6945	1.63271
			13.04	844.935		5.698	1.65334
			13.048	845.831		5.7015	1.6444
			13.056	846.679		5.705	1.63013
			13.064	847.553		5.7085	1.6479
			13.072	848.422		5.712	1.66244
			13.08	849.274		5.7155	1.65009
			13.088	850.123		5.719	1.65363
			13.096	850.966		5.7225	1.67613
			13.104	851.821		5.726	1.67457
			13.112	852.668		5.7295	1.66082
			13.12	853.516		5.733	1.67297
			13.128	854.371		5.7365	1.69007
			13.136	855.217		5.74	1.68005
			13.144	856.062		5.7435	1.67699
			13.152	856.919		5.747	1.69905
			13.16	857.765		5.7505	1.70607
			13.168	858.62		5.754	1.6933
			13.176	859.471		5.7575	1.69976
			13.184	860.317		5.761	1.71894
			13.192	861.171		5.7645	1.71031
			13.2	862.025		5.768	1.69934
			13.208	862.875		5.7715	1.72042
			13.216	863.735		5.775	1.73483
			13.224	864.59		5.7785	1.72303
			13.232	865.445		5.782	1.7253
			13.24	866.309		5.7855	1.74557
			13.248	867.162		5.789	1.73728
			13.256	868.025		5.7925	1.72094
			13.264	868.883		5.796	1.74091
			13.272	869.736		5.7995	1.7603
			13.28	870.608		5.803	1.74873
			13.288	871.466		5.8065	1.74733
			13.296	872.325		5.81	1.76719
			13.304	873.201		5.8135	1.76028
			13.312	874.059		5.817	1.74033
			13.32	874.93		5.8205	1.7553
			13.328	875.809		5.824	1.77644
			13.336	876.67		5.8275	1.76735
			13.344	877.538		5.831	1.76529
			13.352	878.415		5.8345	1.78176
			13.36	879.278		5.838	1.77742
			13.368	880.152		5.8415	1.75493
			13.376	881.025		5.845	1.76277
			13.384	881.866		5.8485	1.78416
			13.392	882.723		5.852	1.77962
			13.4	883.563		5.8555	1.77446
			13.408	884.413		5.859	1.78844
			13.416	885.269		5.8625	1.78883
			13.424	886.109		5.866	1.76724
			13.432	886.962		5.8695	1.7673
			13.44	887.81		5.873	1.78941
			13.448	888.657		5.8765	1.79007
			13.456	889.526		5.88	1.78175
			13.464	890.378		5.8835	1.79407
			13.472	891.231		5.887	1.79888
			13.48	892.103		5.8905	1.77993
			13.488	892.953		5.894	1.77433
			13.496	893.809		5.8975	1.79543
			13.504	894.68		5.901	1.79829
			13.512	895.529		5.9045	1.78651
			13.52	896.393		5.908	1.79832
			13.528	897.265		5.9115	1.80962
			13.536	898.12		5.915	1.79253
			13.544	898.987		5.9185	1.78188
			13.552	899.85		5.922	1.80001
			13.56	900.71		5.9255	1.80332
			13.568	901.583		5.929	1.78936
			13.576	902.441		5.9325	1.80003
			13.584	903.302		5.936	1.81439
			13.592	904.17		5.9395	1.79945
			13.6	905.026		5.943	1.78654
			13.608	905.895		5.9465	1.80071
			13.616	906.757		5.95	1.80572
			13.624	907.615		5.9535	1.79114
			13.632	908.481		5.957	1.79813
			13.64	909.337		5.9605	1.814
			13.648	910.198		5.964	1.80637
			13.656	911.067		5.9675	1.79208
			13.664	911.916		5.971	1.80186
			13.672	912.773		5.9745	1.80708
			13.68	913.639		5.978	1.79274
			13.688	914.49		5.9815	1.79248
			13.696	915.358		5.985	1.81063
			13.704	916.214		5.9885	1.81051
			13.712	917.069		5.992	1.79706
			13.72	917.923		5.9955	1.80043
			13.728	918.757		5.999	1.80711
			13.736	919.605		6.0025	1.79327
			13.744	920.449		6.006	1.786
			13.752	921.283		6.0095	1.80537
			13.76	922.137		6.013	1.81191
			13.768	922.974		6.0165	1.79886
			13.776	923.819		6.02	1.79869
			13.784	924.679		6.0235	1.80799
			13.792	925.516		6.027	1.7943
			13.8	926.37		6.0305	1.78072
			13.808	927.22		6.034	1.79695
			13.816	928.059		6.0375	1.80908
			13.824	928.916		6.041	1.79766
			13.832	929.761		6.0445	1.79557
			13.84	930.61		6.048	1.80681
			13.848	931.464		6.0515	1.79589
			13.856	932.305		6.055	1.77782
			13.864	933.161		6.0585	1.79011
			13.872	934.009		6.062	1.80699
			13.88	934.855		6.0655	1.79938
			13.888	935.715		6.069	1.79593
			13.896	936.554		6.0725	1.80656
			13.904	937.397		6.076	1.79881
			13.912	938.326		6.0795	1.77908
			13.92	939.183		6.083	1.78642
			13.928	940.045		6.0865	1.80427
			13.936	940.926		6.09	1.79969
			13.944	941.783		6.0935	1.79457
			13.952	942.651		6.097	1.80511
			13.96	943.525		6.1005	1.80321
			13.968	944.384		6.104	1.78461
			13.976	945.256		6.1075	1.78407
			13.984	946.129		6.111	1.80071
			13.992	946.986		6.1145	1.80034
			14	947.856		6.118	1.79471
			14.008	948.716		6.1215	1.80496
			14.016	949.578		6.125	1.80942
			14.024	950.446		6.1285	1.79367
			14.032	951.297		6.132	1.78726
			14.04	952.161		6.1355	1.80377
			14.048	953.025		6.139	1.80778
			14.056	953.88		6.1425	1.79994
			14.064	954.753		6.146	1.80916
			14.072	955.614		6.1495	1.81959
			14.08	956.466		6.153	1.8088
			14.088	957.342		6.1565	1.79918
			14.096	958.198		6.16	1.81422
			14.104	959.057		6.1635	1.82013
			14.112	959.931		6.167	1.80902
			14.12	960.783		6.1705	1.81612
			14.128	961.645		6.174	1.83131
			14.136	962.514		6.1775	1.82452
			14.144	963.372		6.181	1.81478
			14.152	964.245		6.1845	1.82726
			14.16	965.107		6.188	1.83294
			14.168	965.971		6.1915	1.82047
			14.176	966.842		6.195	1.82604
			14.184	967.703		6.1985	1.84421
			14.192	968.574		6.202	1.84295
			14.2	969.442		6.2055	1.83407
			14.208	970.303		6.209	1.843
			14.216	971.185		6.2125	1.84988
			14.224	972.052		6.216	1.83805
			14.232	972.921		6.2195	1.84029
			14.24	973.809		6.223	1.8592
			14.248	974.673		6.2265	1.86341
			14.256	975.544		6.23	1.85578
			14.264	976.431		6.2335	1.8634
			14.272	977.296		6.237	1.87256
			14.28	978.177		6.2405	1.86232
			14.288	979.063		6.244	1.85812
			14.296	979.935		6.2475	1.87609
			14.304	980.82		6.251	1.88618
			14.312	981.698		6.2545	1.87938
			14.32	982.57		6.258	1.88444
			14.328	983.446		6.2615	1.89676
			14.336	984.316		6.265	1.88681
			14.344	985.188		6.2685	1.87705
			14.352	986.058		6.272	1.89421
			14.36	986.92		6.2755	1.90847
			14.368	987.796		6.279	1.90125
			14.376	988.666		6.2825	1.90452
			14.384	989.532		6.286	1.91918
			14.392	990.416		6.2895	1.91102
			14.4	991.284		6.293	1.89823
			14.408	992.148		6.2965	1.91359
			14.416	993.028		6.3	1.92943
			14.424	993.896		6.3035	1.92195
			14.432	994.763		6.307	1.92362
			14.44	995.643		6.3105	1.93996
			14.448	996.501		6.314	1.93573
			14.456	997.367		6.3175	1.92019
			14.464	998.236		6.321	1.93067
			14.472	999.094		6.3245	1.945
			14.48	999.956		6.328	1.93804
			14.488	1000.82		6.3315	1.93757
			14.496	1001.67		6.335	1.95479
			14.504	1002.54		6.3385	1.95331
			14.512	1003.4		6.342	1.93667
			14.52	1004.27		6.3455	1.94087
			14.528	1005.13		6.349	1.95534
			14.536	1005.99		6.3525	1.9511
			14.544	1006.87		6.356	1.94751
			14.552	1007.73		6.3595	1.96392
			14.56	1008.6		6.363	1.96727
			14.568	1009.48		6.3665	1.95185
			14.576	1010.34		6.37	1.95048
			14.584	1011.21		6.3735	1.96773
			14.592	1012.09		6.377	1.96452
			14.6	1012.96		6.3805	1.95463
			14.608	1013.83		6.384	1.96922
			14.616	1014.71		6.3875	1.97956
			14.624	1015.58		6.391	1.96577
			14.632	1016.45		6.3945	1.95946
			14.64	1017.33		6.398	1.97634
			14.648	1018.21		6.4015	1.97487
			14.656	1019.08		6.405	1.96046
			14.664	1019.96		6.4085	1.97353
			14.672	1020.84		6.412	1.99157
			14.68	1021.71		6.4155	1.97851
			14.688	1022.59		6.419	1.96743
			14.696	1023.47		6.4225	1.98238
			14.704	1024.34		6.426	1.98487
			14.712	1025.21		6.4295	1.96671
			14.72	1026.09		6.433	1.97657
			14.728	1026.96		6.4365	1.99786
			14.736	1027.82		6.44	1.98864
			14.744	1028.7		6.4435	1.97495
			14.752	1029.56		6.447	1.98744
			14.76	1030.43		6.4505	1.99347
			14.768	1031.31		6.454	1.97426
			14.776	1032.17		6.4575	1.97813
			14.784	1033.04		6.461	2.00095
			14.792	1033.92		6.4645	1.99791
			14.8	1034.79		6.468	1.9827
			14.808	1035.66		6.4715	1.99036
			14.816	1036.53		6.475	1.9979
			14.824	1037.41		6.4785	1.97994
			14.832	1038.27		6.482	1.9746
			14.84	1039.14		6.4855	1.99887
			14.848	1040.02		6.489	2.00426
			14.856	1040.88		6.4925	1.98766
			14.864	1041.76		6.496	1.98858
			14.872	1042.64		6.4995	2.00115
			14.88	1043.5		6.503	1.98696
			14.888	1044.38		6.5065	1.97452
			14.896	1045.25		6.51	1.99659
			14.904	1046.12		6.5135	2.0075
			14.912	1046.99		6.517	1.98976
			14.92	1047.86		6.5205	1.98564
			14.928	1048.73		6.524	2.00295
			14.936	1049.59		6.5275	1.99261
			14.944	1050.47		6.531	1.97291
			14.952	1051.33		6.5345	1.98884
			14.96	1052.19		6.538	2.00467
			14.968	1053.06		6.5415	1.98568
			14.976	1053.92		6.545	1.97756
			14.984	1054.77		6.5485	1.996
			14.992	1055.63		6.552	1.98969
			15	1056.5		6.5555	1.96444
			15.008	1057.35		6.559	1.97518
			15.016	1058.22		6.5625	1.99392
			15.024	1059.09		6.566	1.97806
			15.032	1059.94		6.5695	1.96766
			15.04	1060.81		6.573	1.98471
			15.048	1061.67		6.5765	1.98482
			15.056	1062.53		6.58	1.9599
			15.064	1063.4		6.5835	1.96419
			15.072	1064.26		6.587	1.98263
			15.08	1065.12		6.5905	1.97101
			15.088	1065.98		6.594	1.95638
			15.096	1066.83		6.5975	1.9724
			15.104	1067.69		6.601	1.97995
			15.112	1068.54		6.6045	1.95888
			15.12	1069.4		6.608	1.95412
			15.128	1070.26		6.6115	1.97135
			15.136	1071.11		6.615	1.96496
			15.144	1071.97		6.6185	1.94699
			15.152	1072.84		6.622	1.96041
			15.16	1073.69		6.6255	1.97498
			15.168	1074.56		6.629	1.95619
			15.176	1075.44		6.6325	1.94335
			15.184	1076.29		6.636	1.96166
			15.192	1077.17		6.6395	1.96133
			15.2	1078.03		6.643	1.94031
			15.208	1078.89		6.6465	1.9483
			15.216	1079.77		6.65	1.9701
			15.224	1080.64		6.6535	1.9568
			15.232	1081.51		6.657	1.93996
			15.24	1082.38		6.6605	1.95749
			15.248	1083.26		6.664	1.96364
			15.256	1084.12		6.6675	1.93889
			15.264	1085		6.671	1.9427
			15.272	1085.87		6.6745	1.96948
			15.28	1086.74		6.678	1.9625
			15.288	1087.62		6.6815	1.94477
			15.296	1088.48		6.685	1.95905
			15.304	1089.37		6.6885	1.96972
			15.312	1090.24		6.692	1.9456
			15.32	1091.12		6.6955	1.94574
			15.328	1092.01		6.699	1.97412
			15.336	1092.88		6.7025	1.97509
			15.344	1093.77		6.706	1.95543
			15.352	1094.66		6.7095	1.96462
			15.36	1095.53		6.713	1.98
			15.368	1096.41		6.7165	1.96165
			15.376	1097.3		6.72	1.95455
			15.384	1098.18		6.7235	1.98235
			15.392	1099.06		6.727	1.99022
			15.4	1099.96		6.7305	1.97184
			15.408	1100.84		6.734	1.9771
			15.416	1101.73		6.7375	1.99656
			15.424	1102.62		6.741	1.98469
			15.432	1103.51		6.7445	1.96755
			15.44	1104.41		6.748	1.9926
			15.448	1105.3		6.7515	2.00804
			15.456	1106.2		6.755	1.99195
			15.464	1107.1		6.7585	1.99134
			15.472	1108		6.762	2.01544
			15.48	1108.91		6.7655	2.00851
			15.488	1109.81		6.769	1.98636
			15.496	1110.71		6.7725	2.00715
			15.504	1111.62		6.776	2.03049
			15.512	1112.53		6.7795	2.01571
			15.52	1113.42		6.783	2.01207
			15.528	1114.34		6.7865	2.03734
			15.536	1115.23		6.79	2.03627
			15.544	1116.13		6.7935	2.01289
			15.552	1117.04		6.797	2.02726
			15.56	1117.94		6.8005	2.05225
			15.568	1118.84		6.804	2.03846
			15.576	1119.75		6.8075	2.03285
			15.584	1120.65		6.811	2.05787
			15.592	1121.56		6.8145	2.06312
			15.6	1122.47		6.818	2.0399
			15.608	1123.38		6.8215	2.0472
			15.616	1124.3		6.825	2.07277
			15.624	1125.22		6.8285	2.06502
			15.632	1126.14		6.832	2.05717
			15.64	1127.07		6.8355	2.08109
			15.648	1127.98		6.839	2.09203
			15.656	1128.91		6.8425	2.07027
			15.664	1129.84		6.846	2.0697
			15.672	1130.76		6.8495	2.0949
			15.68	1131.69		6.853	2.09423
			15.688	1132.64		6.8565	2.08107
			15.696	1133.58		6.86	2.10003
			15.704	1134.55		6.8635	2.1161
			15.712	1135.5		6.867	2.09832
			15.72	1136.44		6.8705	2.09109
			15.728	1137.41		6.874	2.1156
			15.736	1138.36		6.8775	2.11775
			15.744	1139.32		6.881	2.09766
			15.752	1140.29		6.8845	2.11227
			15.76	1141.25		6.888	2.13603
			15.768	1142.22		6.8915	2.12144
			15.776	1143.18		6.895	2.10799
			15.784	1144.15		6.8985	2.12739
			15.792	1145.12		6.902	2.1331
			15.8	1146.08		6.9055	2.11078
			15.808	1147.05		6.909	2.121
			15.816	1148.03		6.9125	2.14704
			15.824	1148.99		6.916	2.13283
			15.832	1149.97		6.9195	2.11537
			15.84	1150.96		6.923	2.13035
			15.848	1151.93		6.9265	2.13727
			15.856	1152.91		6.93	2.11385
			15.864	1153.9		6.9335	2.11634
			15.872	1154.87		6.937	2.14025
			15.88	1155.86		6.9405	2.12967
			15.888	1156.85		6.944	2.10959
			15.896	1157.84		6.9475	2.12014
			15.904	1158.84		6.951	2.12854
			15.912	1159.83		6.9545	2.10457
			15.92	1160.82		6.958	2.09849
			15.928	1161.83		6.9615	2.11998
			15.936	1162.83		6.965	2.11644
			15.944	1163.84		6.9685	2.09491
			15.952	1164.85		6.972	2.10047
			15.96	1165.86		6.9755	2.10753
			15.968	1166.88		6.979	2.08401
[truncated: 2,059 more rows]

## Sheet: Fig 1h
Data from Figure 1h
The translation speed of a Janus particle decreases with increasing height above the substrate.
Height (μm)	Speed (μm/s)	Standard deviation (μm/s)
2.5	20.8974	0.85486
7.69231	13.8793	1.47742
10.8392	9.59616	1.22751
13.986	7.3769	0.23615
19.2308	6.55007	0.73502
22.028	5.65931	0.04483
26.2238	5.18347	2.6536
30.0699	3.39828	2.49712
32.5175	2.75743	0.36895
33.5664	1.94927	0.25588
35.6643	1.63592	0.14614
36.7133	1.3491	0.05952

## Sheet: Fig 2b
Data from Figure 2b
Average particle speed U vs driving field frequency ω: Experimental data
Frequency (Hz)	Speed (μm/s)
20	11.5
30	15.9
40	21.1
50	16.83
60	11.87
70	9.11
80	7.1

## Sheet: Fig 3b
Data from Fig 3b
Plot of particle speed vs field frequency (at H₀ = 8 mT) an intermediate height (h ~ 18 μm) and on the substrate (h~ 2.5 μm)
Rolling	h ~ 2.5 μm							Hybrid	h ~ 18 μm
Frequency (Hz)	Speed1 (μm/s)	Speed2 (μm/s)	Speed3 (μm/s)	Mean Speed (μm/s)	Standard deviation (μm/s)			Frequency (Hz)	Speed1 (μm/s)	Speed2 (μm/s)	Speed3 (μm/s)	Speed4 (μm/s)	Mean Speed (μm/s)	Standard deviation (μm/s)
20	12	11.5	12.33	11.9433	0.417892			20	1.483	1.38	1.878	3.76	2.12525	1.11077
30	16.43	15.9	16.82	16.3833	0.461772			30	1.72	3.54	7.67	3.88	4.2025	1.49862
40	23.6	21.1	22.3	22.3333	1.25033			40	4.32	4.454	6.3095	9.48	6.14088	2.20412
50	17.12	16.83	16.5	16.8167	0.310215			50	1.43	1.49	3.54	3.733	2.54825	1.25931
60	11.7	11.87	11.34	11.6367	0.270617			60	0.71	1.22	1.3922	0.78	1.02555	0.33272
70	8.5	9.11	8.7	8.77	0.310966			70	1.703	1.178	1.389	1.58	1.4625	0.26418
80	5.6	7.1	6.24	6.31333	0.752684			80	0.668	0.806	1.04	1.01	0.881	0.18805

## Sheet: Fig 3d
Data from Fig 3d
IPR vector overlay data for trochoidal motion at h ~ 25 μm and f = 40 Hz (part of Supplementary Movie 3 as well)
frame	time	x_tail	y_tail	x_head	y_head
0	0.00546448	81.2258	83.9551	79.2714	80.2375
1	0.010929	81.1498	83.9553	79.1615	80.2557
2	0.0163934	81.1768	84.0175	78.8732	80.5055
3	0.0218579	81.1353	84.0422	78.5649	80.7206
4	0.0273224	81.1276	83.8819	78.9235	80.3066
5	0.0327869	81.2926	83.9235	79.7155	80.0309
6	0.0382514	81.369	83.9141	79.3606	80.2254
7	0.0437158	81.2445	84.0021	79.2082	80.3288
8	0.0491803	81.2772	84.0161	79.1629	80.387
9	0.0546448	81.3996	83.8138	79.6401	80.0002
10	0.0601093	81.3777	83.8197	78.8788	80.4439
11	0.0655738	81.2919	83.7575	78.8556	80.3363
12	0.0710383	81.3483	83.8876	78.8623	80.5024
13	0.0765027	81.3137	83.691	78.9366	80.2285
14	0.0819672	81.2304	83.7627	78.8825	80.2803
15	0.0874317	81.3529	83.6901	79.2448	80.0574
16	0.0928962	81.1368	83.772	78.5429	80.4687
17	0.0983607	81.0914	83.9132	78.8502	80.3611
18	0.103825	80.998	83.8863	78.3803	80.6019
19	0.10929	81.1311	83.7264	78.6255	80.3557
20	0.114754	81.1223	83.763	78.7019	80.3306
21	0.120219	81.1467	83.805	78.5875	80.4747
22	0.125683	80.9924	83.8549	78.3963	80.5533
23	0.131148	81.1312	83.9048	78.7766	80.4269
24	0.136612	81.2082	84.03	79.0827	80.4075
25	0.142077	81.1104	84.0247	78.6888	80.5931
26	0.147541	81.2035	84.037	79.3625	80.262
27	0.153005	81.1468	84.1982	79.109	80.5257
28	0.15847	81.1063	84.0275	79.064	80.3575
29	0.163934	81.2175	83.9329	79.2634	80.2152
30	0.169399	81.2106	83.8796	79.2659	80.1569
31	0.174863	81.0627	84.0185	78.8826	80.4286
32	0.180328	81.1211	83.9937	79.3821	80.1707
33	0.185792	80.9542	83.9487	79.3535	80.0657
34	0.191257	80.9618	83.8473	79.2432	80.015
35	0.196721	80.8407	84.0593	78.5832	80.5176
36	0.202186	80.8583	84.0619	78.7869	80.4082
37	0.20765	80.7506	84.3794	78.9288	80.5951
38	0.213115	80.8092	84.2327	79.0776	80.4063
39	0.218579	80.3998	83.8991	78.0565	80.4137
40	0.224044	80.7404	84.0865	78.7727	80.376
41	0.229508	80.5475	84.096	79.0327	80.1786
42	0.234973	80.7019	84.3921	79.2213	80.4617
43	0.240437	80.6928	84.4589	78.4343	80.9178
44	0.245902	80.625	84.1156	79.1587	80.1799
45	0.251366	80.6551	84.3437	78.8352	80.5585
46	0.256831	80.673	84.7137	77.9568	81.5102
47	0.262295	80.8512	84.4815	79.0869	80.6701
48	0.26776	80.5903	84.3315	78.8998	80.4868
49	0.273224	80.6014	84.0371	78.9236	80.1868
50	0.278689	80.3478	84.2208	77.7533	80.918
51	0.284153	80.4597	84.3214	78.8187	80.4552
52	0.289617	80.394	84.2776	78.1751	80.7116
53	0.295082	80.3684	84.0778	77.8536	80.7139
54	0.300546	80.3996	84.1364	78.1833	80.5688
55	0.306011	80.711	84.383	79.0426	80.5285
56	0.311475	80.6793	84.5089	78.3938	80.9851
57	0.31694	80.6562	84.6908	78.3685	81.1685
58	0.322404	80.5414	84.2836	78.9511	80.3963
59	0.327869	80.6679	84.3706	79.5066	80.3343
60	0.333333	80.5484	84.3959	79.2014	80.4178
61	0.338798	80.3667	84.7532	77.9426	81.3234
62	0.344262	80.4216	84.5336	78.6884	80.708
63	0.349727	80.4469	84.5145	78.1323	81.0099
64	0.355191	80.3792	84.5595	78.0727	81.0495
65	0.360656	80.3796	84.8375	78.2986	81.1892
66	0.36612	80.3582	84.8836	78.3214	81.2105
67	0.371585	80.3877	85.0393	77.5558	81.9377
68	0.377049	80.4243	84.4393	78.41	80.7538
69	0.382514	80.3851	84.69	77.9276	81.2841
70	0.387978	81.0522	85.281	85.1312	84.2803
71	0.393443	79.9126	84.0188	80.6761	79.8888
72	0.398907	79.6135	84.4244	79.5053	80.2258
73	0.404372	79.7295	84.449	80.8776	80.4089
74	0.409836	80.4143	84.7133	80.0677	80.5276
75	0.415301	79.739	84.8554	79.7412	80.6554
76	0.420765	79.3974	85.2764	79.0067	81.0946
77	0.42623	79.6411	84.9412	80.7653	80.8945
78	0.431694	78.6298	84.6576	79.8109	80.6271
79	0.437158	78.5003	84.9214	78.4085	80.7224
80	0.442623	79.8698	85.1234	80.4802	80.968
81	0.448087	79.4492	84.4858	79.8779	80.3077
82	0.453552	79.246	84.6564	79.1101	80.4586
83	0.459016	79.724	85.1391	79.903	80.943
84	0.464481	78.7362	84.4444	79.4969	80.3139
85	0.469945	78.6238	84.6748	79.7546	80.6299
86	0.47541	79.5013	85.3151	81.6569	81.7104
87	0.480874	79.0208	85.0209	79.4615	80.8441
88	0.486339	78.4986	84.4768	79.2079	80.3371
89	0.491803	78.6629	84.9599	80.094	81.0113
90	0.497268	78.4764	84.3071	80.4051	80.5761
91	0.502732	77.8365	84.1862	79.0426	80.1631
92	0.508197	78.3001	84.7846	79.6807	80.818
93	0.513661	78.5802	85.3274	76.9891	89.2143
94	0.519126	78.0487	85.2493	79.8807	81.4699
95	0.52459	77.7783	85.4372	77.0191	81.3064
96	0.530055	77.9671	85.3635	80.3297	81.891
97	0.535519	77.0167	85.4445	74.4062	88.7347
98	0.540984	77.0082	85.4963	78.6476	81.6295
99	0.546448	78.3608	85.9362	79.8481	82.0084
100	0.551913	77.6684	85.4385	78.9788	81.4482
101	0.557377	77.6544	85.2292	79.3872	81.4033
102	0.562842	78.0335	85.4907	82.0025	86.8645
103	0.568306	77.5169	85.0996	79.2956	81.2948
104	0.57377	77.3854	85.3646	78.4239	81.295
105	0.579235	78.5399	86.1592	80.5627	82.4784
106	0.584699	77.7866	85.5302	73.6638	84.7283
107	0.590164	77.5048	85.7209	78.9215	81.767
108	0.595628	77.5993	85.7764	79.9173	82.274
109	0.601093	76.646	85.1573	77.24	80.9995
110	0.606557	76.6148	85.157	78.1209	81.2363
111	0.612022	77.6582	85.5947	80.3488	82.3697
112	0.617486	77.0341	85.3292	79.1447	81.698
113	0.622951	76.7597	85.5314	78.0672	81.5401
114	0.628415	76.8401	85.5223	80.1828	82.9795
115	0.63388	75.9728	84.8996	74.2673	81.0614
116	0.639344	76.0697	85.3745	78.8811	82.2543
117	0.644809	76.9052	85.844	79.0273	82.2195
118	0.650273	76.1348	85.239	78.3599	81.6769
119	0.655738	76.4336	85.1858	78.534	81.5488
120	0.661202	76.5419	85.016	79.1964	81.7612
121	0.666667	75.9548	84.4311	79.4493	82.1012
122	0.672131	76.0004	84.7233	78.2109	81.1521
123	0.677596	76.7522	85.2934	79.7424	82.3441
124	0.68306	76.2192	85.0406	78.9356	81.8373
125	0.688525	76.3087	85.2953	78.5105	81.7187
126	0.693989	76.1779	85.0517	79.341	82.2886
127	0.699454	75.3854	84.4644	77.8435	81.0589
128	0.704918	75.5312	84.5606	77.3979	80.7982
129	0.710383	75.9559	84.9606	78.218	81.4219
130	0.715847	75.4548	84.4536	77.9256	81.0572
131	0.721311	75.7091	84.7702	78.1759	81.371
132	0.726776	75.5888	84.521	79.017	82.0946
133	0.73224	75.0547	84.2838	78.7285	82.2484
134	0.737705	75.0166	84.4755	78.359	81.9322
135	0.743169	75.4428	85.0183	77.8137	81.5515
136	0.748634	74.8545	84.4805	76.656	80.6865
137	0.754098	75.2914	84.7	77.7531	81.297
138	0.759563	75.0664	84.1867	75.43	88.3709
139	0.765027	74.537	83.7916	73.747	79.6666
140	0.770492	74.7569	84.0977	77.477	80.8975
141	0.775956	75.4312	84.5463	77.982	81.2096
142	0.781421	74.7495	84.2505	71.7799	87.2207
143	0.786885	74.7013	84.1427	77.1767	80.7497
144	0.79235	74.7423	84.1608	71.4132	86.7215
145	0.797814	74.1409	83.7561	76.2936	80.1497
146	0.803279	73.9822	83.9654	76.6498	80.7213
147	0.808743	75.0207	84.0939	73.0016	87.7767
148	0.814208	74.4162	83.7919	76.5323	80.164
149	0.819672	74.3149	84.2319	76.5825	80.6966
150	0.825137	74.2844	84.0249	77.4941	81.3161
151	0.830601	73.5012	83.4397	76.1885	80.2119
152	0.836066	73.5851	83.6717	75.5756	79.9734
153	0.84153	74.6122	84.3087	77.7908	81.5635
154	0.846995	73.6092	84.2511	76.183	80.9321
155	0.852459	73.9822	84.1284	76.607	80.8496
156	0.857923	74.0682	84.4999	78.2676	84.4322
156	0.863388	74.0682	84.5001	78.2676	84.568
157	0.868852	73.2123	83.5027	76.3863	80.752
158	0.874317	73.2962	83.6889	75.5483	80.1438
159	0.879781	74.3713	84.5034	77.8607	82.1659
160	0.885246	73.6228	83.9873	76.8533	81.3033
161	0.89071	73.6557	83.9307	76.6525	80.9881
162	0.896175	73.5834	84.0951	77.4544	82.4655
163	0.901639	72.8217	83.3039	75.5864	80.1422
164	0.907104	72.9802	83.3961	76.0476	80.5271
165	0.912568	73.9703	84.387	77.4281	82.0031
166	0.918033	73.2185	83.8138	76.5573	81.2658
167	0.923497	73.1933	83.8288	75.8789	80.5997
168	0.928962	73.3876	83.8726	77.1699	82.0467
169	0.934426	72.5438	82.9134	75.1716	79.637
170	0.939891	72.3687	83.3202	75.7834	80.8749
171	0.945355	73.4295	84.3546	77.1326	82.3728
172	0.95082	72.6228	83.6226	75.7478	80.8166
173	0.956284	72.8541	83.8911	76.3134	81.5092
174	0.961749	72.9374	83.8479	76.9583	82.6345
175	0.967213	72.1543	83.2209	76.0835	81.7373
176	0.972678	72.5378	83.3579	76.0266	81.0194
177	0.978142	72.9919	84.1882	76.3372	81.6486
178	0.983607	72.6632	83.8123	75.421	80.6445
179	0.989071	72.5277	83.8621	75.2027	80.6242
180	0.994536	72.6012	83.629	76.2245	81.5048
181	1	72.2318	83.3495	76.0693	81.6426
182	1.00546	72.5266	83.9833	76.5168	82.6726
183	1.01093	72.3563	84.0114	75.7084	81.4808
184	1.01639	71.7656	83.6344	75.5071	81.7263
185	1.02186	72.3889	83.7847	75.7621	81.2825
186	1.02732	72.1457	83.4089	75.9785	81.6914
187	1.03279	71.6967	82.7249	74.2578	79.3962
188	1.03825	71.7684	83.0649	74.922	80.291
189	1.04372	72.093	83.5888	75.7244	81.4786
190	1.04918	71.8452	83.1548	74.815	80.185
191	1.05464	72.2238	83.4873	75.4632	80.814
192	1.06011	71.7984	83.1358	75.2009	80.6736
193	1.06557	71.4361	82.4767	74.7207	79.8592
194	1.07104	71.7258	82.7101	74.2333	79.3408
195	1.0765	72.4785	83.6955	76.1535	81.6623
196	1.08197	71.6117	83.198	75.2763	81.1459
197	1.08743	71.7214	83.1251	74.705	80.169
198	1.0929	71.6364	82.8214	75.4698	81.1054
199	1.09836	70.9012	82.0666	74.0632	79.3022
200	1.10383	71.1825	82.2059	73.8663	78.9753
201	1.10929	71.8921	83.206	75.2838	80.7288
202	1.11475	71.2383	82.6237	74.2915	79.7395
203	1.12022	71.2825	82.8127	74.7469	80.4382
204	1.12568	71.5116	82.6141	75.281	80.7616
205	1.13115	70.7582	82.1691	74.0894	79.6111
206	1.13661	70.8247	82.1896	74.207	79.6996
207	1.14208	71.6121	82.8112	75.0886	80.4545
208	1.14754	70.816	82.4129	74.1014	79.7964
209	1.15301	70.8142	82.7527	73.8883	79.8908
210	1.15847	71.1242	82.5187	75.1685	81.3856
211	1.16393	70.1776	81.671	73.794	79.5352
212	1.1694	70.5305	81.9381	74.2251	79.9406
213	1.17486	71.1033	82.9352	74.9624	81.2777
214	1.18033	70.5176	82.3501	74.1319	80.2107
215	1.18579	70.5627	82.4029	74.253	80.3975
216	1.19126	70.5629	82.6909	73.6984	79.8964
217	1.19672	70.0036	81.8692	73.7203	79.913
218	1.20219	69.9282	81.9684	72.8073	78.9105
219	1.20765	70.7609	82.7257	74.0969	80.174
220	1.21311	70.1255	82.1899	73.9819	80.5261
221	1.21858	70.2284	82.1024	74.0052	80.265
222	1.22404	70.1285	82.4591	74.2266	81.5394
223	1.22951	69.7089	81.4847	73.0604	78.9535
224	1.23497	69.638	81.4154	72.7128	78.5545
225	1.24044	70	82.5174	70	78.3174
226	1.2459	69.6802	81.7397	73.5988	80.2281
227	1.25137	69.7614	81.6821	73.0853	79.1146
228	1.25683	69.8192	82.1438	73.5819	80.2778
229	1.2623	69.172	81.0045	72.4516	78.3808
230	1.26776	69.1861	81.0562	72.8126	78.9377
231	1.27322	69.4602	82.1791	70.7193	86.186
232	1.27869	69.5188	81.8038	73.2357	79.848
233	1.28415	69.0783	81.8373	72.277	79.1155
234	1.28962	69.5015	82.0959	73.4544	80.6767
235	1.29508	68.7891	80.6066	72.6699	79.0006
236	1.30055	68.6199	80.7495	72.2202	78.5867
237	1.30601	69.5548	81.9401	73.413	80.2804
238	1.31148	68.9232	81.3765	72.3034	78.8837
239	1.31694	68.9495	81.3639	72.446	79.037
240	1.3224	69.0651	81.5254	73.0258	80.1279
241	1.32787	68.7259	80.5557	72.3009	78.3512
242	1.33333	68.9237	80.7325	72.6638	78.8215
243	1.3388	69.2354	81.6409	73.3123	80.6313
244	1.34426	68.7711	81.1641	72.6852	79.641
245	1.34973	69.0098	81.214	72.6174	79.0634
246	1.35519	69.3835	81.6492	73.4422	80.5689
247	1.36066	68.7847	80.5721	72.6368	78.8984
248	1.36612	68.7714	80.3496	72.5334	78.4822
249	1.37158	69.1068	81.4381	73.2015	80.5033
250	1.37705	68.845	81.201	72.8363	79.8934
251	1.38251	69.0767	81.1278	72.8745	79.3342
252	1.38798	68.8046	80.6809	72.9504	80.008
253	1.39344	68.5056	79.8097	72.4723	78.4292
254	1.39891	68.4276	80.182	72.4228	78.8867
255	1.40437	68.8751	81.2207	72.8293	79.8053
256	1.40984	68.446	80.4159	72.3049	78.7579
257	1.4153	68.681	80.3688	72.6729	79.0634
258	1.42077	68.7022	80.5361	72.7444	79.3959
259	1.42623	68.2917	79.5187	72.3276	78.3562
260	1.43169	68.5382	79.7883	72.4755	78.3262
261	1.43716	68.8451	80.6396	72.9422	79.7154
262	1.44262	68.5882	79.4676	72.3488	77.5974
263	1.44809	68.3839	80.0634	72.5123	79.2912
264	1.45355	68.8598	80.3722	72.5142	78.3019
265	1.45902	68.1496	79.4103	72.2007	78.3019
266	1.46448	68.2953	79.2892	71.9888	77.2897
267	1.46995	68.3861	80.3258	71.7717	82.8113
268	1.47541	68.2286	79.5158	72.0017	77.671
269	1.48087	68.3708	79.8671	72.4242	78.7671
270	1.48634	68.6426	80.288	72.4895	78.6024
271	1.4918	68.1919	79.0167	71.8696	76.9883
272	1.49727	67.9352	78.8726	71.5587	76.7487
273	1.50273	68.5943	80.2525	72.7599	79.7165
274	1.5082	68.2404	79.5002	72.0156	77.6596
275	1.51366	68.4739	79.3892	72.4099	77.9237
276	1.51913	68.9195	79.7521	72.7606	78.0535
277	1.52459	67.8927	78.7604	71.9415	77.6436
278	1.53005	67.8643	78.6181	71.5403	76.5868
279	1.53552	68.1232	79.3308	72.2277	78.4401
280	1.54098	68.0576	79.353	72.085	78.1614
281	1.54645	67.7999	78.933	71.6247	77.1978
282	1.55191	68.215	79.2301	71.922	77.2559
283	1.55738	67.7198	78.794	71.3337	76.654
284	1.56284	67.425	78.3449	71.4721	77.2221
285	1.56831	67.3912	78.5123	71.4298	77.3592
286	1.57377	67.7239	79.1482	71.6145	77.5662
287	1.57923	67.2891	78.6887	70.8161	76.4083
288	1.5847	67.5183	79.2821	71.5618	78.1464
289	1.59016	67.479	78.5929	71.5692	77.639
290	1.59563	66.9487	78.1219	70.9084	76.7217
291	1.60109	67.0581	78.2589	71.0218	76.87
292	1.60656	67.4827	79.2681	71.604	78.459
293	1.61202	67.0794	78.4389	70.9031	76.7013
294	1.61749	67.117	78.6218	70.7766	76.561
295	1.62295	67.3277	78.5662	71.4213	77.6267
296	1.62842	66.4764	77.6026	70.5486	76.5742
297	1.63388	66.734	77.88	70.4785	75.9778
298	1.63934	67.1191	79.2773	71.0882	77.9039
299	1.64481	66.8216	78.3039	70.9026	77.3114
300	1.65027	66.7878	78.2695	70.963	77.8135
301	1.65574	66.9334	78.4536	71.1275	78.2308
302	1.6612	66.5143	77.3258	70.6475	76.5794
303	1.66667	66.4544	77.3651	70.5784	76.5693
304	1.67213	66.5678	78.3248	70.7307	77.768
305	1.6776	66.1805	77.5337	70.3451	76.9898
306	1.68306	66.4379	77.488	70.5398	76.5855
307	1.68852	66.6192	78.3449	70.8169	78.2068
308	1.69399	66.4302	76.7063	70.5212	75.7558
309	1.69945	66.0335	76.5032	70.094	75.4299
310	1.70492	65.9175	77.5297	62.4358	75.1808
311	1.71038	65.952	77.2497	69.933	75.9112
312	1.71585	66.1075	77.205	70.0772	75.8335
313	1.72131	66.2559	77.4774	70.4517	77.664
314	1.72678	65.7691	76.1791	69.9184	75.5285
315	1.73224	65.9183	76.2491	69.9653	75.1256
316	1.7377	65.8688	77.1907	70.0684	77.1356
317	1.74317	66.0679	77.2944	70.1843	76.4606
318	1.74863	65.8852	76.5879	69.9074	75.3791
319	1.7541	66.0177	76.8579	69.9632	75.4182
320	1.75956	65.8197	76.2297	69.986	75.6992
321	1.76503	65.938	75.9659	70.028	75.0108
322	1.77049	65.7177	76.2755	69.8593	75.5774
323	1.77596	65.8753	76.6637	69.9457	75.6282
324	1.78142	65.5989	76.1623	69.6969	75.2424
325	1.78689	65.7128	76.3916	69.8277	75.5504
326	1.79235	65.6779	76.3439	69.8755	76.4866
327	1.79781	65.3447	75.4228	69.5138	74.9144
328	1.80328	65.4918	75.3811	69.6036	74.5249
329	1.80874	65.6039	76.4125	69.8038	76.4381
330	1.81421	64.8755	75.8885	68.7955	74.3806
331	1.81967	65.6328	76.1913	69.7936	75.6189
332	1.82514	65.4965	75.6042	69.6962	75.55
333	1.8306	64.8424	75.049	69.009	74.5199
334	1.83607	65.0944	75.5341	69.263	76.0467
335	1.84153	64.8932	75.7026	69.0497	75.0996
336	1.84699	64.8362	75.3264	69.0278	75.0617
337	1.85246	64.9946	75.2493	69.1336	74.5362
338	1.85792	64.5614	75.3459	68.6376	76.3581
339	1.86339	64.5307	74.5022	68.6989	73.9865
340	1.86885	64.7296	74.5086	68.855	73.7204
341	1.87432	64.6221	75.6359	68.8215	75.561
342	1.87978	64.2168	74.8759	68.3719	74.2633
343	1.88525	64.4101	75.0027	68.6091	74.9103
344	1.89071	64.4271	75.4946	68.5973	75.9936
345	1.89617	64.4708	74.2126	68.6533	73.8295
346	1.90164	64.1334	74.1748	68.313	73.7609
347	1.9071	63.8215	74.7981	60.1371	72.7818
348	1.91257	64.1484	74.4211	68.2864	73.7022
349	1.91803	64.3464	74.5232	68.5227	74.9693
350	1.9235	64.3409	75.0305	68.4538	75.8815
351	1.92896	64.1364	73.3366	68.336	73.3928
352	1.93443	64.1661	73.2946	68.3522	72.9527
353	1.93989	63.8965	73.8068	62.2882	69.9269
354	1.94536	63.9174	74.1367	68.0556	74.8541
355	1.95082	63.6478	73.7984	67.7465	74.7154
356	1.95628	63.8802	74.1375	67.6682	75.9518
357	1.96175	64.0711	73.009	68.2352	73.5568
358	1.96721	63.9673	73.3658	68.0491	74.3553
359	1.97268	63.8396	73.9148	67.5849	75.8155
360	1.97814	63.5368	73.6005	67.7142	74.0359
361	1.98361	63.4069	73.5697	67.2738	75.209
362	1.98907	63.7991	73.6964	67.9469	74.3563
363	1.99454	63.8416	73.3257	67.9693	74.1016
364	2	63.5736	73.1159	67.657	74.0986
365	2.00546	63.8593	73.3198	67.8786	74.5385
366	2.01093	63.5512	73.3903	67.7316	73.7952
367	2.01639	63.4878	73.3623	67.5214	74.5329
368	2.02186	63.9925	73.5024	68.0792	74.4711
369	2.02732	63.7774	73.2399	67.2426	75.6132
370	2.03279	63.8167	72.3132	67.9176	73.22
371	2.03825	63.7352	72.316	67.923	72.6363
372	2.04372	63.5774	73.2877	67.6317	74.3844
373	2.04918	63.4682	72.6709	67.645	73.112
374	2.05464	63.7225	73.0444	67.9052	73.4259
375	2.06011	63.7514	72.721	67.1351	75.2091
376	2.06557	63.7464	71.9681	67.8596	72.8179
377	2.07104	63.9164	72.447	67.8081	74.0266
378	2.0765	63.7891	73.353	67.149	75.8732
379	2.08197	63.7305	72.3814	67.7593	73.5681
380	2.08743	63.7873	72.4328	67.8541	73.4823
381	2.0929	63.9577	72.5875	67.619	74.6455
382	2.09836	64.2449	71.6162	68.3071	72.6831
383	2.10383	64.3929	71.8144	68.4856	72.7579
384	2.10929	63.8818	72.475	67.6324	74.3652
385	2.11475	63.8222	71.5513	67.8973	72.5678
386	2.12022	64.1628	71.9613	67.9304	73.8175
387	2.12568	64.298	72.522	68.2201	74.0244
388	2.13115	64.3909	71.1415	68.0835	73.1428
389	2.13661	64.4671	71.0794	68.5207	72.1789
390	2.14208	63.945	72.1325	67.3794	74.5501
391	2.14754	63.8134	71.5195	67.7725	72.9215
392	2.15301	64.2239	71.7563	67.8879	73.8095
393	2.15847	64.1281	71.675	68.2283	72.5852
394	2.16393	64.1216	70.6405	68.1872	71.6945
395	2.1694	64.2672	70.8167	68.2784	72.0619
396	2.17486	64.0815	71.7138	67.8342	73.5997
397	2.18033	63.9274	71.0035	67.7528	72.7375
398	2.18579	64.107	70.8708	67.9219	72.6277
399	2.19126	64.5504	71.3821	68.6811	72.1418
400	2.19672	64.3588	70.3801	68.4907	71.1332
401	2.20219	64.5968	70.521	68.7108	71.3665
402	2.20765	64.1415	71.1018	67.8817	73.0125
403	2.21311	64.2919	70.5478	68.3992	71.425
404	2.21858	64.2361	70.5912	68.0397	72.3724
405	2.22404	64.7635	71.0207	68.6716	72.5589
406	2.22951	64.747	70.2139	68.5416	72.0143
407	2.23497	64.7573	69.7158	68.9263	70.2253
408	2.24044	64.503	70.4658	68.2202	72.4208
409	2.2459	64.2436	70.3377	68.4229	70.7544
410	2.25137	64.4391	70.3037	68.5314	71.2491
411	2.25683	64.7775	70.6956	68.7902	71.9358
412	2.2623	64.6206	69.3353	68.6651	70.4675
413	2.26776	64.7269	69.2377	68.9236	69.4042
414	2.27322	64.7594	70.0393	68.5401	71.8685
415	2.27869	64.4841	69.5501	68.643	70.1358
416	2.28415	64.3136	69.6482	68.1922	71.2596
417	2.28962	64.9419	69.759	68.8888	71.1947
418	2.29508	64.71	68.488	68.8195	69.3551
419	2.30055	64.8071	68.4675	68.9562	69.1194
420	2.30601	64.3191	68.9375	66.9781	72.1886
421	2.31148	64.2508	68.8602	68.2523	70.1362
422	2.31694	64.0537	68.8259	67.526	71.1887
423	2.3224	64.6089	69.1824	68.6649	70.2727
424	2.32787	64.8819	68.4582	68.9211	69.6092
425	2.33333	64.6812	68.1174	68.6976	69.3458
426	2.3388	64.6287	68.1257	68.3427	70.0869
427	2.34426	64.1484	68.735	67.8417	70.735
428	2.34973	64.2952	68.5597	68.156	70.2133
429	2.35519	64.5292	68.8715	68.3621	70.5888
430	2.36066	64.4371	68.5206	67.8407	70.9814
431	2.36612	64.5442	67.5818	68.6844	68.2878
432	2.37158	64.6097	68.0195	68.1473	70.2834
433	2.37705	64.2015	68.9166	67.5182	71.4934
434	2.38251	64.0921	68.4213	67.4149	70.9902
435	2.38798	64.4994	68.4633	68.1817	70.4834
436	2.39344	64.3097	68.5031	67.1193	71.625
437	2.39891	64.5585	67.4947	68.2318	69.5311
438	2.40437	64.8667	67.8917	68.4603	70.0657
439	2.40984	64.3228	68.6254	68.0639	70.5344
440	2.4153	64.1713	67.696	67.5428	70.2005
441	2.42077	64.3723	67.7929	67.5809	70.503
442	2.42623	64.4081	68.0105	67.8397	70.4321
443	2.43169	64.8978	67.0065	67.9644	69.8763
444	2.43716	64.921	66.9894	68.2732	69.5198
445	2.44262	64.4225	67.497	67.7572	70.0504
446	2.44809	64.4944	66.8466	67.9919	69.172
447	2.45355	64.6157	67.5485	67.4195	70.6756
448	2.45902	64.7553	67.5199	67.9232	70.2776
449	2.46448	64.8595	66.4883	67.8649	69.4221
450	2.46995	65.2055	66.6895	68.7204	68.9886
451	2.47541	64.6852	67.3525	67.2253	70.6973
452	2.48087	64.5653	66.8143	68.1094	69.0681
453	2.48634	64.9171	67.029	68.1579	69.7005
454	2.4918	64.5299	66.716	67.2163	69.9445
455	2.49727	65.2245	65.8575	68.9343	67.8265
456	2.50273	65.2825	66.452	68.2378	69.4363
457	2.5082	64.3961	66.7611	66.0005	70.6426
458	2.51366	64.6993	66.2576	67.6292	69.2668
459	2.51913	64.7596	66.4146	67.5594	69.5453
460	2.52459	64.7797	66.6556	66.8268	70.3229
461	2.53005	65.1692	65.7392	68.222	68.6237
462	2.53552	65.2668	65.918	68.0456	69.0673
463	2.54098	64.5902	66.029	66.8427	69.5739
464	2.54645	64.8206	65.8107	67.0528	69.3684
465	2.55191	64.8716	65.9962	67.0033	69.615
466	2.55738	65.3664	66.2781	68.4965	69.0785
467	2.56284	65.1029	65.6441	66.3099	69.6669
468	2.56831	65.4657	65.5544	66.5028	69.6244
469	2.57377	64.8223	65.7388	65.9892	69.7735
470	2.57923	65.465	65.5152	67.9947	68.8679
471	2.5847	65.1781	65.9123	67.4808	69.4248
472	2.59016	65.8155	66.0814	68.9159	68.9148
473	2.59563	65.7826	64.9005	68.3949	68.1892
474	2.60109	65.7077	64.8474	68.5853	67.9068
475	2.60656	65.5896	65.6304	66.8247	69.6447
476	2.61202	65.53	64.9706	68.0738	68.3127
477	2.61749	65.5344	64.9367	68.021	68.3215
478	2.62295	65.7613	65.474	67.9103	69.0826
479	2.62842	66.0502	64.5704	69.2915	67.2413
480	2.63388	66.0958	64.8981	68.6236	68.2523
481	2.63934	66.0925	64.9835	67.996	68.7274
482	2.64481	65.6323	64.5446	66.5978	68.6321
483	2.65027	65.7303	64.8053	67.5028	68.6129
484	2.65574	66.308	65.1151	69.5075	67.8361
485	2.6612	66.4828	64.8304	68.8705	68.2857
486	2.66667	66.5635	64.3073	68.4092	68.08
487	2.67213	66.5018	64.5605	68.3488	68.3326
488	2.6776	66.0875	64.7445	69.1267	67.6434
489	2.68306	66.1325	64.529	67.8229	68.3738
490	2.68852	66.5019	65.0482	68.8967	68.4984
491	2.69399	66.35	64.589	67.8852	68.4984
492	2.69945	66.8781	63.6209	69.4514	66.9403
493	2.70492	66.8635	64.0952	69.2895	67.5236
494	2.71038	65.9903	64.6573	67.3827	68.6198
495	2.71585	66.4781	63.883	68.2626	67.685
496	2.72131	66.6873	64.1009	68.7014	67.7865
497	2.72678	66.3992	63.9728	67.3353	68.0672
498	2.73224	66.7315	63.7831	68.5622	67.5632
499	2.7377	66.8117	64.0898	67.942	68.1349
500	2.74317	66.7478	63.8934	69.2369	67.2764
501	2.74863	66.7005	63.4773	68.2833	67.3676
502	2.7541	66.8466	64.0959	68.6137	67.906
503	2.75956	67.1542	63.8472	67.8184	67.9944
504	2.76503	67.5626	63.3592	68.5394	67.4441
505	2.77049	67.5465	63.6315	68.6635	67.6803
506	2.77596	66.8139	63.7434	67.3031	67.9148
507	2.78142	67.1167	63.2426	68.0072	67.3471
508	2.78689	67.4559	64.119	68.7018	68.1299
509	2.79235	67.3695	63.6569	68.0963	67.7935
510	2.79781	67.6613	62.8477	67.9304	67.0391
511	2.80328	67.9854	63.2764	68.7378	67.4085
512	2.80874	67.2619	63.4237	67.4196	67.6208
513	2.81421	67.5405	63.312	68.0852	67.4766
514	2.81967	67.5887	63.4698	68.0984	67.6388
515	2.82514	67.4996	63.4606	67.6173	67.6589
516	2.8306	68.1612	62.7643	68.4914	66.9513
517	2.83607	68.4914	63.5161	69.0211	67.6826
518	2.84153	67.6787	63.1417	66.9685	67.2812
519	2.84699	67.8783	62.8489	68.3059	67.027
520	2.85246	67.9509	62.9389	68.3897	67.1159
521	2.85792	68.1773	63.4942	68.3008	67.6924
522	2.86339	68.4918	63.2487	68.3649	67.4468
523	2.86885	68.485	63.296	68.7023	67.4904
524	2.87432	67.8027	62.6284	66.5668	66.6425
525	2.87978	68.2788	62.6245	67.9546	66.812
526	2.88525	68.2104	63.2895	67.0778	67.3339
527	2.89071	68.3392	62.9543	66.779	66.8537
528	2.89617	68.475	62.4747	66.7164	66.2888
529	2.90164	68.5999	62.9231	67.26	66.9036
530	2.9071	67.9223	62.8101	65.6151	66.3196
531	2.91257	68.3395	62.9138	67.0428	66.9086
532	2.91803	68.1972	63.3102	66.6381	67.2101
533	2.9235	68.6851	62.7681	66.4175	66.3034
534	2.92896	68.599	62.2528	65.7911	65.3762
535	2.93443	68.4711	62.8077	65.6242	65.8956
536	2.93989	68.4648	62.6271	66.0524	66.0652
537	2.94536	68.8659	62.2664	66.5084	65.7424
538	2.95082	68.4086	62.8526	66.0376	66.3193
539	2.95628	68.9207	62.8097	67.0108	66.5503
540	2.96175	69.0715	61.8357	65.6659	64.2937
541	2.96721	68.892	62.7248	65.9028	65.6751
542	2.97268	68.7172	62.0492	65.3137	64.5101
543	2.97814	69.0231	62.0401	66.6414	65.4995
544	2.98361	68.8286	62.9445	66.2761	66.2799
545	2.98907	68.9358	62.5617	66.0394	65.6032
546	2.99454	69.3246	62.4653	66.9253	65.9125
547	3	69.1903	62.8582	66.369	65.9695
548	3.00546	69.4518	62.2234	65.9	64.4651
549	3.01093	69.2777	62.299	66.9054	65.7649
550	3.01639	69.0343	62.99	66.3556	66.2249
551	3.02186	69.5162	62.702	67.1275	66.1566
552	3.02732	69.8416	62.5157	65.8504	63.8235
553	3.03279	69.5029	63.0375	66.2308	65.6706
554	3.03825	69.4094	63.388	65.8741	65.6555
555	3.04372	69.49	62.7992	66.1289	65.3176
556	3.04918	69.2364	62.7171	65.9296	65.3066
557	3.05464	69.762	63.092	66.3156	65.4925
558	3.06011	70.1188	63.0911	66.5315	65.2755
559	3.06557	69.655	63.7129	66.0253	65.8259
560	3.07104	69.4817	63.7179	65.4382	64.8537
561	3.0765	70.1084	62.7697	67.1725	65.7731
562	3.08197	69.5704	63.3251	66.012	65.5562
563	3.08743	69.7769	63.8502	66.2707	66.1625
564	3.0929	70.2501	63.5471	66.4743	65.3865
565	3.09836	69.8579	63.7409	66.0307	65.4706
566	3.10383	70.0968	63.8136	66.0852	65.0572
567	3.10929	70.0903	63.4192	66.2299	65.0737
568	3.11475	69.6589	63.7014	65.8177	65.4
569	3.12022	69.6981	64.1218	66.1054	66.2971
570	3.12568	70.2608	63.7135	66.1474	64.5619
571	3.13115	69.9272	63.8757	65.7823	64.554
572	3.13661	69.7435	64.7157	66.0825	66.7741
573	3.14208	70.1824	63.63	66.1442	64.7846
574	3.14754	69.8509	63.9834	66.0513	65.7731
575	3.15301	70.0535	64.4973	66.0646	65.8121
576	3.15847	70.563	63.7868	66.9411	61.6603
577	3.16393	70.2354	64.7686	66.3074	66.2554
578	3.1694	69.8808	65.1752	65.8161	66.2327
579	3.17486	70.7218	64.3385	66.85	65.9661
580	3.18033	70.3966	64.295	66.3017	65.2288
581	3.18579	70.0208	64.7531	65.892	65.5232
582	3.19126	71.1312	64.5145	75.308	64.0731
583	3.19672	70.4433	65.2362	66.2455	65.3738
584	3.20219	70.1574	65.3281	65.9699	65.6526
585	3.20765	70.92	64.6354	67.3034	62.4999
586	3.21311	70.9423	64.5296	66.7502	64.7872
587	3.21858	70.2187	64.8347	66.0294	65.134
588	3.22404	71.1435	64.9049	74.1078	61.9295
589	3.22951	70.5353	65.3813	66.342	65.1439
590	3.23497	70.2302	65.6453	66.0323	65.7771
591	3.24044	70.89	65.5153	66.7598	64.7524
592	3.2459	70.7675	65.0031	66.5836	64.6361
593	3.25137	70.4416	65.1985	66.2799	64.6326
594	3.25683	71.1781	65.1635	75.2516	66.1863
595	3.2623	70.3709	65.5533	66.5037	63.9149
596	3.26776	69.8354	65.8372	65.7853	64.7254
597	3.27322	71.2732	65.3324	67.271	64.0588
598	3.27869	70.6962	65.4775	66.508	65.1626
599	3.28415	70.2229	65.5392	66.1906	64.3643
600	3.28962	71.3343	65.499	74.4707	62.7056
601	3.29508	70.2494	65.9695	66.4091	64.2689
602	3.30055	69.9634	66.0199	66.2559	64.0465
603	3.30601	71.0141	65.5638	69.0764	61.8374
604	3.31148	70.581	65.5604	66.537	64.4265
605	3.31694	69.9985	65.798	66.5976	63.3336
606	3.3224	70.6708	66.0952	69.3028	70.0662
607	3.32787	69.9992	66.0825	67.2286	62.926
608	3.33333	69.6349	66.0851	66.1495	63.7417
609	3.3388	70.2026	66.2545	68.1965	62.5646
610	3.34426	70.614	65.934	68.2485	62.4635
611	3.34973	70.2189	65.9194	67.5251	62.6971
612	3.35519	70.4604	66.5228	67.0907	64.0158
613	3.36066	70.3066	66.3705	74.0971	68.1794
614	3.36612	69.6233	66.3679	67.5849	62.6958
615	3.37158	69.4992	66.8645	68.1603	62.8836
616	3.37705	70.5026	66.6468	67.8222	63.4134
617	3.38251	70.0174	66.5449	66.436	68.739
618	3.38798	69.9158	66.8912	67.5346	63.4314
619	3.39344	70.2262	67.1471	71.9031	70.9978
620	3.39891	69.3899	67.1923	66.4494	64.1935
621	3.40437	69.282	67.4744	68.1776	63.4222
622	3.40984	70.6032	67.3531	68.3483	70.8964
623	3.4153	69.7954	67.3342	66.3692	69.7634
624	3.42077	69.4066	67.4349	67.9555	63.4936
625	3.42623	70.1081	67.5932	74.2591	68.2331
626	3.43169	69.1774	67.3363	68.9673	63.1416
627	3.43716	68.6235	67.2695	66.5701	63.6057
628	3.44262	69.7651	67.4912	65.5832	67.8813
629	3.44809	69.6905	67.4983	66.8616	64.3939
630	3.45355	68.9912	67.6091	67.5132	63.6778
631	3.45902	69.5268	68.1715	68.5497	72.2563
632	3.46448	69.0312	67.5168	73.1213	66.5623
633	3.46995	68.5197	67.7088	65.4184	64.8765
634	3.47541	68.53	68.0414	67.7635	63.9119
635	3.48087	69.6654	68.2221	70.4508	64.0962
636	3.48634	69.0149	68.0239	68.9464	63.8245
637	3.4918	69.048	68.2427	68.2657	64.1162
638	3.49727	68.9271	68.2472	68.9189	64.0472
639	3.50273	68.4146	67.9057	68.3384	63.7064
640	3.5082	68.2946	68.308	68.2529	64.1082
641	3.51366	69.6017	68.4621	66.3928	65.7523
642	3.51913	68.7578	68.2089	65.9736	71.3535
643	3.52459	68.6678	68.3041	68.2653	64.1234
644	3.53005	68.7802	68.3771	70.3531	64.4827
645	3.53552	67.8609	68.0165	67.5935	63.825
646	3.54098	67.5059	68.0094	66.7265	63.8823
647	3.54645	68.6315	68.4547	64.5023	67.6871
648	3.55191	68.3167	68.2599	67.6285	64.1167
649	3.55738	68.1183	68.1864	68.4744	64.0015
650	3.56284	68.4433	68.5265	65.4566	71.4794
651	3.56831	67.3401	67.7315	68.7956	63.7917
652	3.57377	67.1166	67.9157	68.8579	64.0936
653	3.57923	67.8507	68.5084	63.6509	68.4676
654	3.5847	67.9036	68.4321	69.2461	64.4524
655	3.59016	67.3312	68.2108	67.6171	64.0205
656	3.59563	67.9688	68.4832	63.8775	69.4327
657	3.60109	66.8634	67.8634	63.8936	64.8936
658	3.60656	66.6772	68.0655	68.4555	64.2605
659	3.61202	67.8886	68.8593	64.8323	65.9785
660	3.61749	67.3676	68.4288	69.6072	64.8757
661	3.62295	67.4023	68.396	68.7854	64.4302
662	3.62842	67.657	68.6523	70.0802	65.2219
663	3.63388	66.5792	67.8962	68.3823	64.1029
664	3.63934	66.388	67.9577	68.1304	64.1361
665	3.64481	67.2483	68.5321	71.362	67.6853
666	3.65027	66.9735	68.3405	68.2722	64.3463
667	3.65574	66.6593	68.2905	67.9875	64.306
668	3.6612	67.1006	68.5126	71.2382	67.7914
669	3.66667	65.9717	67.6011	67.3841	63.6457
670	3.67213	65.7307	67.567	67.7593	63.8894
671	3.6776	66.1265	68.2554	69.4015	65.6258
672	3.68306	66.4287	68.3917	68.5054	64.741
673	3.68852	66.0662	68.1604	68.8864	65.0481
674	3.69399	66.5056	68.4144	68.3942	64.6629
675	3.69945	65.8604	67.7836	65.4586	63.6029
676	3.70492	65.6048	67.6637	67.3839	63.8591
677	3.71038	65.7271	68.1179	68.7679	65.2208
678	3.71585	66.3255	68.5632	69.6925	66.0526
679	3.72131	65.7117	68.1969	68.2554	64.8548
680	3.72678	65.5758	68.444	67.4377	64.6792
681	3.73224	65.7358	68.2067	69.0355	65.6082
682	3.7377	65.0173	67.6914	68.1565	64.9011
683	3.74317	65.0417	67.6829	67.3135	64.1504
684	3.74863	65.9316	68.563	67.4372	64.6421
685	3.7541	65.4213	68.2248	68.4098	65.2737
686	3.75956	65.17	68.0342	68.3374	65.276
687	3.76503	65.9135	68.2837	68.9758	65.4094
688	3.77049	64.8969	67.4717	68.3425	65.0701
689	3.77596	64.4573	67.3145	67.474	64.3923
690	3.78142	64.8152	67.9601	68.5679	66.0741
691	3.78689	65.1593	68.2995	68.8497	66.2944
692	3.79235	64.7762	68.086	67.6278	65.0024
693	3.79781	65.0242	68.199	68.0379	65.2737
694	3.80328	64.56	67.4479	67.5952	64.5449
695	3.80874	64.2439	67.076	67.6688	64.6449
696	3.81421	64.1808	67.2744	67.037	64.1952
697	3.81967	64.9344	68.1686	68.5586	66.046
698	3.82514	64.1883	67.396	67.8853	65.403
699	3.8306	63.9378	67.7548	67.1512	65.0504
700	3.83607	64.0366	67.5727	68.0271	66.2626
701	3.84153	63.4945	67.0323	67.2741	65.2009
702	3.84699	63.3504	67.1675	67.1814	65.4461
703	3.85246	63.6633	68.1934	61.8822	71.997
704	3.85792	63.5078	67.4484	67.2874	65.6168
705	3.86339	63.651	67.3902	67.1229	65.0268
706	3.86885	63.7761	67.9769	67.3701	65.8036
707	3.87432	63.1007	66.6715	66.8079	64.6976
708	3.87978	63.0404	66.4278	66.8218	64.6001
709	3.88525	63.1544	67.2414	67.3433	66.9358
710	3.89071	63.3393	67.4502	67.2334	65.8766
711	3.89617	63.1318	67.2273	66.8855	65.3431
712	3.90164	63.3737	67.4642	67.2234	65.785
713	3.9071	63.0757	66.4989	67.194	65.6748
714	3.91257	62.5247	66.2523	66.3845	64.5966
715	3.91803	62.8571	66.4812	66.3178	64.1014
716	3.9235	63.3635	67.3666	67.2917	65.8803
717	3.92896	62.7968	66.8175	66.473	64.7865
718	3.93443	62.6565	66.9893	66.2744	64.856
719	3.93989	62.7301	67.043	66.8157	66.0691
720	3.94536	62.2565	66.3444	66.211	64.9295
721	3.95082	62.5097	66.5117	66.4791	65.1394
722	3.95628	62.7019	67.4796	66.5028	65.6925
723	3.96175	62.2145	66.7245	65.6642	64.3287
724	3.96721	62.3998	67.0614	66.3241	65.565
725	3.97268	62.6407	67.6125	66.6823	66.4702
726	3.97814	61.9218	66.2414	65.446	63.9567
727	3.98361	61.8771	66.1252	65.5854	64.1533
728	3.98907	62.1684	67.3437	65.5246	69.8687
729	3.99454	61.8507	66.761	65.6935	65.0662
730	4	62.1182	66.7191	66.0271	65.1827
731	4.00546	62.1655	67.3042	66.1239	65.9004
732	4.01093	61.7193	65.7244	65.6418	64.2232
733	4.01639	61.4992	65.5417	65.4916	64.2376
734	4.02186	61.7099	66.2106	65.5532	64.5168
735	4.02732	61.8038	66.7807	65.539	64.8602
736	4.03279	61.8455	66.2768	65.7964	64.8518
737	4.03825	61.7497	66.2365	65.5442	64.4362
738	4.04372	61.6422	65.7386	65.7926	66.3826
739	4.04918	61.4466	65.393	65.5989	64.7623
740	4.05464	61.3864	65.6056	65.4433	64.5187
741	4.06011	61.711	66.6034	65.8289	65.7771
742	4.06557	61.3473	65.5512	65.3208	64.1905
743	4.07104	61.5959	65.6303	65.6582	64.5635
744	4.0765	61.7471	66.3289	65.8356	65.3674
745	4.08197	61.3204	64.9596	65.383	63.8941
746	4.08743	61.0517	64.9954	64.9398	63.4071
747	4.0929	61.4408	65.9686	65.6323	65.7021
748	4.09836	61.0839	65.5138	65.1026	64.293
749	4.10383	61.0616	65.5416	65.0843	64.3341
750	4.10929	61.5395	66.098	65.676	65.3706
751	4.11475	61.3907	65.1241	65.5095	64.3025
752	4.12022	60.7459	64.6665	64.8622	63.8321
753	4.12568	61.0482	65.1916	65.1827	64.4527
754	4.13115	61.1657	65.7005	65.2861	64.8867
755	4.13661	60.7239	65.3534	64.7382	64.1184
756	4.14208	60.8765	65.5448	64.9603	64.5638
757	4.14754	60.8046	65.3191	64.9504	65.9921
758	4.15301	60.398	64.5434	64.4979	63.6319
759	4.15847	60.6135	64.7416	64.5428	63.258
760	4.16393	60.6918	65.822	64.8319	65.1155
761	4.1694	60.2543	65.1174	64.2828	63.9294
762	4.17486	60.2648	64.972	64.2839	63.7526
763	4.18033	60.569	65.6508	64.6826	64.8032
764	4.18579	60.3753	64.5154	64.482	63.6351
765	4.19126	60.3534	64.4517	64.5141	63.8778
766	4.19672	60.3305	65.2476	64.529	65.3614
767	4.20219	60.2009	65.2562	64.3756	64.7958
768	4.20765	60.1516	65.207	64.2798	64.4339
769	4.21311	60.6022	65.451	64.7816	65.0355
770	4.21858	60.2451	64.2928	64.3871	63.597
771	4.22404	59.7585	63.741	63.864	62.8547
772	4.22951	59.9603	64.5879	64.1526	64.8417
773	4.23497	60.1201	64.9379	64.2803	64.3608
774	4.24044	60.0297	64.5505	64.2003	64.0542
775	4.2459	60.0778	64.6285	64.0927	63.3953
776	4.25137	60.023	64.43	64.2102	64.7574
777	4.25683	59.785	63.7057	63.9427	63.1112
778	4.2623	59.9642	64.0941	64.1008	63.3671
779	4.26776	59.9743	65.1491	64.1727	65.0331
780	4.27322	59.682	64.3664	63.8795	64.2207
781	4.27869	59.8297	64.4373	64.0264	64.2724
782	4.28415	59.8266	64.6741	64.0257	64.7623
783	4.28962	59.7881	63.718	63.9881	63.7089
784	4.29508	59.9047	63.6334	64.0739	63.1263
785	4.30055	59.5784	64.6414	57.2425	61.1509
786	4.30601	59.3848	64.2263	63.5699	63.872
787	4.31148	59.516	64.4157	63.7023	64.0764
788	4.31694	59.8839	64.8428	64.0834	64.7742
789	4.3224	59.5881	63.49	63.7373	62.8386
790	4.32787	59.2718	63.4005	63.4057	62.6587
791	4.33333	59.3789	64.023	63.4966	64.8504
792	4.3388	59.5147	64.4178	63.7068	64.161
793	4.34426	59.3638	64.1034	63.5296	63.5684
794	4.34973	59.4721	64.25	63.6664	64.0316
795	4.35519	59.2431	63.5337	63.3387	64.4644
796	4.36066	59.5	62.5872	63.6939	62.3606
797	4.36612	59.5224	63.2624	63.6832	62.6901
798	4.37158	59.569	64.2842	63.7671	64.1579
799	4.37705	59.3303	63.4183	63.5147	63.0568
800	4.38251	59.4267	63.4541	63.6155	63.1485
801	4.38798	59.6324	63.6664	63.7783	62.9943
802	4.39344	59.5189	62.6469	63.7157	62.8112
803	4.39891	59.3957	62.6894	63.5767	63.0885
804	4.40437	59.3411	63.6258	63.5381	63.4692
805	4.40984	59.1616	62.6912	63.3611	62.7552
806	4.4153	59.1179	62.7226	63.3179	62.7035
807	4.42077	59.6536	63.4429	63.8354	63.8337
808	4.42623	59.4782	62.2681	63.6634	62.6211
809	4.43169	59.234	61.7313	63.4334	61.8043
810	4.43716	59.4019	62.3001	63.6017	62.3453
811	4.44262	59.3301	62.5169	63.5014	62.0265
812	4.44809	59.2564	62.6151	63.3354	63.616
813	4.45355	59.6776	62.8066	63.8659	62.4936
814	4.45902	59.6054	62.1249	63.7928	62.4492
815	4.46448	59.4539	61.389	63.6536	61.3426
816	4.46995	59.7426	61.5807	63.939	61.4054
817	4.47541	59.8728	62.9582	64.0723	63.0218
818	4.48087	59.2445	62.1851	63.4322	62.5066
819	4.48634	59.7437	62.1336	63.9214	62.5655
820	4.4918	59.5938	62.3701	63.6175	63.5741
821	4.49727	59.5521	61.0913	63.7521	61.089
822	4.50273	59.7135	61.2161	63.9132	61.163
823	4.5082	59.2448	62.2552	63.4238	62.6743
824	4.51366	59.1752	61.4723	63.3751	61.4511
825	4.51913	59.3319	61.1535	63.5318	61.1701
826	4.52459	59.7583	61.6717	63.9464	61.3568
827	4.53005	59.3946	60.5223	63.5913	60.689
828	4.53552	59.238	60.4114	63.424	60.0694
829	4.54098	59.141	60.6496	63.3018	61.2224
830	4.54645	58.9228	60.8662	63.1115	61.1744
831	4.55191	59.041	60.8472	63.1731	61.5996
832	4.55738	59.4258	61.303	63.625	61.2183
833	4.56284	59.3354	60.5568	63.5163	60.9572
834	4.56831	59.0255	59.6484	63.1757	59.0034
835	4.57377	59.2844	60.2625	63.4747	59.9771
836	4.57923	59.3356	61.4355	63.4603	62.227
837	4.5847	58.9752	60.4238	63.1595	60.0609
838	4.59016	58.9512	60.5418	63.1468	60.7353
839	4.59563	59.1872	60.5468	63.348	61.1192
840	4.60109	59.3452	59.4478	63.5176	58.9671
841	4.60656	59.3688	59.9898	63.5648	60.1734
842	4.61202	58.7816	61.0807	62.8572	62.0954
843	4.61749	58.7671	60.3023	62.9455	60.727
844	4.62295	58.9522	60.424	63.0849	61.1729
845	4.62842	59.3429	60.7821	63.4786	61.5145
846	4.63388	59.3549	59.8476	63.5155	60.4213
847	4.63934	59.456	59.51	63.6549	59.4107
848	4.64481	59.0529	59.904	62.3042	62.5628
849	4.65027	58.8791	59.9278	62.81	61.4069
850	4.65574	59.0806	60.2076	63.0029	61.7095
851	4.6612	59.2529	60.377	63.4101	60.9747
852	4.66667	59.1998	59.5143	63.3741	59.9782
853	4.67213	59.0065	58.7998	63.1441	59.5206
854	4.6776	59.2622	59.2916	63.3992	60.0161
855	4.68306	58.856	59.8373	63.0427	60.1705
856	4.68852	58.9599	59.4567	63.0453	60.4309
857	4.69399	58.8835	59.4704	63.0518	59.9851
858	4.69945	59.0257	59.2197	62.7842	61.0943
859	4.70492	58.9885	58.7521	62.7393	60.642
860	4.71038	59.1574	59.5585	63.1334	60.9118
861	4.71585	58.8833	59.3164	63.0745	59.589
862	4.72131	58.736	59.0205	62.7893	60.1207
863	4.72678	58.945	59.3928	62.7645	61.1395
864	4.73224	59.2957	58.9323	63.318	60.1412
865	4.7377	59.4856	58.5997	63.603	59.429
866	4.74317	59.6164	58.7588	63.7903	59.226
867	4.74863	59.4652	59.3616	63.5856	60.1755
868	4.7541	59.0417	58.8149	62.7413	60.8032
869	4.75956	59.4169	59.4692	63.5374	60.2827
870	4.76503	59.3928	59.3661	63.4927	60.2778
871	4.77049	59.3874	58.2523	63.5872	58.2071
872	4.77596	59.7578	58.414	63.8594	59.3178
873	4.78142	59.2397	59.4481	62.9702	61.3777
874	4.78689	59.0794	58.6994	63.0002	60.2052
875	4.79235	59.2869	58.8358	63.3619	59.8529
876	4.79781	59.3726	58.7949	63.2261	60.4653
877	4.80328	59.2874	57.8931	63.3627	58.9087
878	4.80874	59.7916	58.1021	63.8846	59.0439
879	4.81421	59.3982	59.1064	63.3641	60.4891
880	4.81967	59.4341	58.1803	63.6139	58.5917
881	4.82514	59.5196	58.0367	63.6765	58.6371
882	4.8306	59.9061	58.5573	63.8184	60.0848
883	4.83607	59.7032	57.9522	63.3878	59.9681
884	4.84153	59.8672	57.9883	63.8012	59.4592
885	4.84699	59.5425	58.413	63.2466	60.3929
886	4.85246	59.4613	57.9276	63.537	58.9418
887	4.85792	59.5449	57.632	63.6639	58.453
888	4.86339	59.9492	58.2266	63.9046	59.6391
889	4.86885	59.8016	57.7201	63.4397	59.8187
890	4.87432	59.7765	57.0397	63.9369	57.6148
891	4.87978	59.7468	57.3243	63.9015	57.9394
892	4.88525	59.3846	58.0306	63.3661	59.3675
893	4.89071	59.3974	57.7085	63.4211	58.9126
894	4.89617	59.5498	57.9309	63.4894	59.3867
895	4.90164	59.702	57.4837	62.7699	60.3521
896	4.9071	59.7979	56.4693	63.8362	57.6234
897	4.91257	59.8954	57.0384	63.4475	59.2795
898	4.91803	59.6891	57.8677	63.5177	59.5946
899	4.9235	59.5424	56.9964	63.3619	58.7431
900	4.92896	59.8162	57.269	63.5842	59.1244
901	4.93443	59.4774	57.1462	62.5986	59.9567
902	4.93989	59.7361	56.3955	62.5448	59.5181
903	4.94536	60.0206	56.9065	63.407	59.3909
904	4.95082	59.3387	57.0906	62.9463	59.2412
905	4.95628	59.3266	56.3218	62.9537	58.4393
906	4.96175	59.6076	56.7057	63.3612	58.59
907	4.96721	59.4636	56.6879	63.1167	58.7603
908	4.97268	59.9063	55.79	63.3322	58.2198
909	4.97814	59.9158	55.5946	63.7647	57.2757
910	4.98361	59.25	56.3051	62.4638	59.0092
911	4.98907	59.6922	55.706	63.6299	57.1672
912	4.99454	59.5561	55.8337	63.3447	57.6468
913	5	59.8958	56.3425	63.0785	59.083
914	5.00546	60.0091	55.0817	63.7923	56.9058
915	5.01093	60.3447	55.0182	63.9413	57.1871
916	5.01639	60.146	55.4836	63.6623	57.7806
917	5.02186	59.7825	55.5413	63.3875	57.6963
918	5.02732	59.7985	55.3891	62.7468	58.3803
919	5.03279	60.1488	55.7864	63.0567	58.8168
920	5.03825	60.3243	54.9834	63.5865	57.6288
921	5.04372	60.2042	54.7676	63.5347	57.3265
922	5.04918	60.4233	55.1161	64.2126	56.9277
923	5.05464	59.7927	55.5778	62.5996	58.7021
924	5.06011	59.7238	54.7679	62.9573	57.4483
925	5.06557	59.817	55.4476	62.1421	58.9452
926	5.07104	60.2455	55.2302	62.1203	58.9885
927	5.0765	60.4637	54.7903	63.7498	57.406
928	5.08197	60.5512	54.7516	64.2987	56.648
929	5.08743	59.7175	55.0944	61.3701	58.9556
930	5.0929	59.8822	54.5931	62.6155	57.782
931	5.09836	60.4718	55.5161	63.1601	58.7431
932	5.10383	60.5007	55.1328	61.4297	59.2288
933	5.10929	60.6854	54.4857	62.5257	58.261
934	5.11475	60.8148	54.7983	63.0531	58.3522
935	5.12022	60.1703	55.0097	62.5159	58.4937
936	5.12568	60.1339	54.8108	62.8017	58.0547
937	5.13115	60.36	54.9982	62.9121	58.3339
938	5.13661	60.4727	54.3432	61.8785	58.3009
939	5.14208	60.6907	54.0777	63.17	57.4678
940	5.14754	61.025	54.3566	63.747	57.5551
941	5.15301	60.1211	54.8708	62.0554	58.5989
942	5.15847	60.2672	53.8492	63.2772	56.7784
943	5.16393	60.4498	54.1036	63.0899	57.37
944	5.1694	60.4494	54.439	61.8235	58.4078
945	5.17486	61.0219	53.703	63.8061	56.8475
946	5.18033	61.1087	53.8505	63.9193	56.9715
947	5.18579	60.0651	54.4233	62.1645	58.061
948	5.19126	60.4942	53.7038	63.4871	56.6504
949	5.19672	60.6318	54.1421	63.2786	57.4032
950	5.20219	60.5141	54.5422	61.9406	58.4926
951	5.20765	61.2546	53.5565	64.2583	56.4921
952	5.21311	61.3429	53.7688	62.8611	57.6848
953	5.21858	60.5518	53.8126	61.9906	57.7584
954	5.22404	60.8678	53.4369	62.0391	57.4703
955	5.22951	61.3968	53.7578	63.6964	57.2723
956	5.23497	61.5139	54.0019	63.3556	57.7766
957	5.24044	61.7319	52.7931	64.2623	56.1453
958	5.2459	61.8122	53.1106	64.4605	56.3705
959	5.25137	61.3922	53.7303	63.0041	57.6087
960	5.25683	61.6844	53.1456	64.0594	56.6096
961	5.2623	61.5513	53.0624	63.7527	56.6392
962	5.26776	61.7226	53.4084	63.7606	57.0808
963	5.27322	62.2099	52.7192	63.5576	56.6971
964	5.27869	62.3112	53.004	63.8822	56.8991
965	5.28415	62.3843	53.3668	63.7324	57.3446
966	5.28962	61.9441	52.8045	63.9501	56.4945
967	5.29508	61.7989	52.7338	63.7331	56.4619
968	5.30055	62.2618	53.4497	64.2438	57.1526
969	5.30601	62.1709	52.9487	62.4012	57.1424
970	5.31148	62.603	52.499	64.6087	56.1892
971	5.31694	62.6861	52.6126	64.695	56.301
972	5.3224	61.983	52.8287	63.2907	56.8199
973	5.32787	62.0105	52.4973	63.4618	56.4386
974	5.33333	62.2292	53.1952	63.052	57.3138
975	5.3388	62.3156	52.6562	63.1557	56.7713
976	5.34426	62.737	51.9319	65.0385	55.4452
977	5.34973	62.8034	52.5542	63.5619	56.6852
978	5.35519	61.6981	52.8953	62.2429	57.0598
979	5.36066	62.0927	52.2826	62.9772	56.3884
980	5.36612	62.4327	52.5014	63.2213	56.6267
981	5.37158	62.4731	52.1662	62.0809	56.3478
982	5.37705	63.1038	51.9189	64.6046	55.8416
983	5.38251	63.1744	52.626	64.6392	56.5623
984	5.38798	62.6103	52.3745	63.3103	56.5158
985	5.39344	62.6905	52.1996	64.3628	56.0523
986	5.39891	62.72	52.6301	63.298	56.7901
987	5.40437	62.8987	52.3318	62.5472	56.5171
988	5.40984	63.4027	51.9213	64.4285	55.9941
989	5.4153	63.4974	52.3604	64.6678	56.394
990	5.42077	62.8383	51.8952	63.8058	55.9823
991	5.42623	62.8387	52.0981	64.1783	56.0788
992	5.43169	62.9915	52.3143	63.6195	56.4671
993	5.43716	63.4156	51.6207	63.3182	55.8195
994	5.44262	63.4124	51.6958	63.2781	55.8936
995	5.44809	63.0993	51.6736	62.373	55.8103
996	5.45355	63.437	51.5979	64.3087	55.7064
997	5.45902	63.1258	51.8104	63.3915	56.002
998	5.46448	63.1951	51.9098	63.0117	56.1058
999	5.46995	63.5335	51.0243	63.5567	55.2242
1000	5.47541	63.6028	51.5537	63.812	55.7485
1001	5.48087	63.5312	51.9605	62.9054	56.1136
1002	5.48634	63.4888	51.1709	64.3127	55.2893
1003	5.4918	63.2821	50.9942	63.3472	55.1937
1004	5.49727	63.6083	51.3436	64.6113	55.4221
1005	5.50273	63.9709	51.3206	63.6044	55.5046
1006	5.5082	64.4202	51.0458	65.4128	55.1268
1007	5.51366	64.3512	51.3499	63.8824	55.5236
1008	5.51913	63.5707	50.9872	63.341	55.1809
1009	5.52459	63.7595	51.0335	63.9447	55.2294
1010	5.53005	63.6793	51.6957	63.6278	55.8954
1011	5.53552	63.8951	50.9261	62.6317	54.9316
1012	5.54098	64.4319	50.6687	64.3532	54.868
1013	5.54645	64.676	50.9183	64.9857	55.1068
1014	5.55191	63.6394	51.2198	63.4047	55.4132
1015	5.55738	63.6319	50.8305	62.919	54.9695
1016	5.56284	64.002	51.3268	63.6671	55.5134
1017	5.56831	64.3046	50.8263	62.8474	54.7654
1018	5.57377	64.5905	50.752	63.5415	54.8189
1019	5.57923	64.45	51.5431	64.1026	55.7287
1020	5.5847	64.1814	51.1234	62.8353	55.1019
1021	5.59016	64.5209	50.3879	64.3098	54.5826
1022	5.59563	64.5513	51.0564	63.8982	55.2053
1023	5.60109	64.4726	50.6987	62.0495	54.1292
1024	5.60656	65.2466	50.8048	64.3466	54.9073
1025	5.61202	65.3767	51.2848	64.3729	55.3631
1026	5.61749	64.3945	50.6033	63.2432	54.6424
1027	5.62295	64.9159	49.9219	64.4674	54.0979
1028	5.62842	64.9132	50.8089	63.9311	54.8925
1029	5.63388	65.0872	50.5402	63.5986	54.4675
1030	5.63934	65.4069	50.2545	64.2374	54.2884
1031	5.64481	65.473	50.7716	64.2704	54.7957
1032	5.65027	65.0567	50.3558	63.7441	54.3454
1033	5.65574	65.3232	50.5528	64.1253	54.5783
1034	5.6612	65.173	51.4003	63.659	55.3179
1035	5.66667	65.3382	50.9952	63.7489	54.8829
1036	5.67213	66.1386	50.6896	65.1047	54.7604
1037	5.6776	65.9986	51.084	64.3323	54.9393
1038	5.68306	65.8403	51.2523	63.9759	55.0158
1039	5.68852	65.4887	50.9666	64.3729	55.0157
1040	5.69399	65.3829	50.9199	63.7484	54.7889
1041	5.69945	65.5446	51.2232	63.3398	54.798
1042	5.70492	66.3796	50.9777	63.7169	54.2258
1043	5.71038	66.2176	51.4628	64.6978	55.3782
1044	5.71585	66.2796	51.3627	64.5255	55.1789
1045	5.72131	66.2578	50.7231	65.2972	54.8118
1046	5.72678	66.0439	50.8506	64.3198	54.6804
1047	5.73224	65.994	51.2148	63.5643	54.6407
1048	5.7377	66.3811	50.9547	63.1925	53.6884
1049	5.74317	66.3315	51.2668	64.4149	55.004
1050	5.74863	66.5265	51.3687	64.5619	55.0809
1051	5.7541	66.2769	50.6072	64.0002	54.1366
1052	5.75956	66.3439	50.7801	64.1811	54.3803
1053	5.76503	66.7096	51.0936	63.512	53.8166
1054	5.77049	66.8875	50.5991	64.2729	53.886
1055	5.77596	67.4427	50.7368	65.0182	54.1664
1056	5.78142	67.1311	51.3453	65.0741	55.0071
1057	5.78689	67.1466	50.647	64.6933	54.0561
1058	5.79235	66.9813	50.9881	63.9827	53.9289
1059	5.79781	67.0091	50.9599	64.2577	54.1331
1060	5.80328	67.216	50.8394	64.2307	53.7937
1061	5.80874	67.9125	51.0452	64.7175	53.7713
1062	5.81421	67.4139	51.3744	64.3066	54.2001
1063	5.81967	67.6563	51.7415	64.2769	54.2354
1064	5.82514	67.5781	50.9001	64.5168	53.7756
1065	5.8306	67.3158	50.8055	63.973	53.3482
1066	5.83607	67.4768	51.4565	64.2244	54.1139
1067	5.84153	67.8127	51.3308	63.9963	53.0845
1068	5.84699	67.8959	51.7639	64.7773	54.5771
1069	5.85246	68.0446	51.908	64.7649	54.5316
1070	5.85792	67.9011	50.8089	64.4613	53.219
1071	5.86339	67.7823	50.9635	64.3686	53.4103
1072	5.86885	67.8132	51.7126	64.1931	53.8421
1073	5.87432	68.1695	51.1965	64.553	53.3322
1074	5.87978	68.4953	51.292	65.0111	53.6373
1075	5.88525	67.992	51.9334	64.344	54.0147
1076	5.89071	68.2925	51.529	64.6085	53.5461
1077	5.89617	68.1099	51.538	64.2861	53.2753
1078	5.90164	67.9032	51.6027	64.1227	53.4323
1079	5.9071	68.9003	51.3291	65.6777	54.0227
1080	5.91257	68.8406	51.5405	64.8178	52.7475
1081	5.91803	68.0576	51.965	64	53.0495
1082	5.9235	68.2419	52.249	64.2087	53.4209
1083	5.92896	68.699	51.4228	64.7609	52.8827
1084	5.93443	68.1325	51.5317	64.045	52.4974
1085	5.93989	68.3227	51.9886	64.3038	53.2086
1086	5.94536	68.8523	52.2163	64.666	51.8775
1087	5.95082	68.2752	52.4056	64.086	52.7065
1088	5.95628	68.1378	52.7713	64.0354	53.6713
1089	5.96175	68.9423	51.5296	64.7502	51.7873
1090	5.96721	68.3802	51.8019	64.2827	52.7241
1091	5.97268	68.4061	52.5691	64.2817	53.3624
1092	5.97814	69.1179	52.0475	73.096	50.7004
1093	5.98361	68.4411	52.6439	64.2417	52.7141
1094	5.98907	68.1817	52.8366	64.0161	53.3729
1095	5.99454	69	52.5	69	52.5
1095	6	69	52.5	69	52.5
1096	6.00546	68.651	52.5361	64.4513	52.5882
1097	6.01093	68.1063	52.5645	63.9303	52.1161
1098	6.01639	69.2679	52.5609	73.4034	51.8278
1099	6.02186	68.5791	52.7459	64.4671	51.8907
1100	6.02732	68.2222	53.0138	64.0261	52.8321
1101	6.03279	68.6408	53.4373	64.5559	52.4606
1102	6.03825	69.1048	52.6474	64.9877	51.8171
1103	6.04372	68.7317	52.6612	64.5484	52.2873
1104	6.04918	68.9411	53.2921	64.7643	52.8512
1105	6.05464	69.2121	53.4131	73.3966	53.0523
1106	6.06011	68.3389	53.4777	64.192	52.812
1107	6.06557	68.1808	53.7819	64.2792	52.227
1108	6.07104	69.509	53.145	65.3313	52.7119
1109	6.0765	68.999	53.3947	64.9106	52.433
1110	6.08197	68.4209	53.8403	64.4498	52.4729
1111	6.08743	69.5701	53.9842	71.5443	50.2772
1112	6.0929	68.7159	54.1716	64.7794	52.7074
1113	6.09836	68.3909	54.2973	65.0338	51.7733
1114	6.10383	69.534	54	65.334	54
1115	6.10929	69.383	54.1925	65.6649	52.2393
1116	6.11475	68.5588	54.3971	64.6179	52.9447
1117	6.12022	69.6865	54.4084	65.6049	55.3984
1118	6.12568	68.9807	54.4797	65.966	57.4039
1119	6.13115	68.482	54.4902	64.9703	52.1863
1120	6.13661	68.8421	54.5141	66.9978	50.7406
1121	6.14208	69.5119	54.556	66.6372	51.4939
1122	6.14754	68.6633	54.4637	65.3562	51.8746
1123	6.15301	69.0956	54.8844	66.3106	51.7405
1124	6.15847	68.9538	54.9264	66.3965	51.5947
1125	6.16393	68.1955	55.0374	65.0841	52.2161
1126	6.1694	68.0253	55.1453	64.6384	52.6616
1127	6.17486	69.4941	54.9148	67.8966	51.0305
1128	6.18033	68.7304	54.9476	66.0605	51.7055
1129	6.18579	68.3306	55.0642	65.344	52.1112
1130	6.19126	69	55.466	68.9824	59.666
1131	6.19672	67.9014	55.3464	65.5565	51.8619
1132	6.20219	67.9166	55.3793	65.4644	51.9695
1133	6.20765	68.6486	55.397	65.5916	58.2772
1134	6.21311	68.6912	55.4472	64.5082	55.8245
1135	6.21858	68.1152	55.2796	66.1581	51.5634
1136	6.22404	68.6175	55.6499	68.1612	51.4748
1137	6.22951	67.746	55.4543	63.8119	56.9247
1138	6.23497	67.4994	55.1999	67.9135	59.3794
1139	6.24044	67.2766	55.3567	66.5743	51.2159
1140	6.2459	68.7033	55.2484	68.5789	51.0502
1141	6.25137	67.9336	55.1852	66.8142	51.1372
1142	6.25683	67.7443	55.3122	67.2461	51.1418
1143	6.2623	67.8702	55.4762	70.1874	51.9733
1144	6.26776	67.2684	55.3752	67.5327	51.1835
1145	6.27322	66.9679	55.8447	66.5008	51.6708
1146	6.27869	68.2437	55.9184	68.9224	51.7736
1147	6.28415	67.4778	55.6051	68.491	51.5291
1148	6.28962	67.5	55.9966	67.259	51.8035
1149	6.29508	67.6688	56.0404	67.4445	51.8463
1150	6.30055	66.5651	55.7647	70.6888	54.9678
1151	6.30601	66.4588	55.8452	67.3643	51.744
1152	6.31148	67.79	56.3541	65.3442	52.9396
1153	6.31694	67.3512	56.0523	70.7242	58.5549
1154	6.3224	66.9585	55.9927	69.5503	52.6878
1155	6.32787	67.6283	56.325	66.5265	52.2721
1156	6.33333	66.5084	55.8507	70.7009	55.5989
1157	6.3388	66.3943	55.4824	67.6935	59.4764
1158	6.34426	66.934	56.2078	66.7858	52.0104
1159	6.34973	67.0183	56.2826	69.0472	52.6051
1160	6.35519	66.6425	55.9249	69.9376	53.3206
1161	6.36066	67.0016	56.3684	67.3098	52.1797
1162	6.36612	66.5651	55.7917	70.6411	56.8046
1163	6.37158	65.9105	55.6309	69.3531	53.2251
1164	6.37705	66.3393	56.0458	67.1911	51.9331
1165	6.38251	66.6348	56.3039	67.8697	52.2895
1166	6.38798	66.4328	55.761	70.2946	57.4121
1167	6.39344	66.4328	56.0951	67.6156	52.0651
1168	6.39891	66.4398	56.2876	67.6299	52.2597
1169	6.40437	65.7111	55.7037	69.9111	55.7183
1170	6.40984	65.6248	56.0553	67.4672	52.281
1171	6.4153	66.3941	56.3503	66.9181	52.1831
1172	6.42077	65.6675	55.9177	69.8322	55.3746
1173	6.42623	65.7688	56.0589	65.6718	51.86
1174	6.43169	66.0649	56.436	67.0315	52.3487
1175	6.43716	65.0201	55.5059	68.9811	56.9023
1176	6.44262	64.7144	55.5274	68.0825	53.0181
1177	6.44809	65.8731	56.4642	64.744	52.4188
1178	6.45355	65.6167	56.1233	69.5695	57.5428
1179	6.45902	65.4148	56.0014	68.2419	52.8954
1180	6.46448	65.8039	56.2987	67.3993	52.4135
1181	6.46995	64.8962	55.5377	69.0032	54.6583
1182	6.47541	64.4934	55.3909	68.6335	54.6839
1183	6.48087	64.7679	55.8646	66.0266	51.8577
1184	6.48634	65.5329	56.2309	66.3573	52.1126
1185	6.4918	64.8374	56.0159	68.7356	54.4525
1186	6.49727	65.1038	56.1576	66.4094	52.1656
1187	6.50273	65.2446	56.08	68.5286	53.4617
1188	6.5082	64.6586	55.4264	68.8443	55.0794
1189	6.51366	64.6778	55.4149	67.614	52.4118
1190	6.51913	65.5041	56.4101	66.0032	52.2398
1191	6.52459	64.6965	55.7942	68.8918	55.5941
1192	6.53005	64.8375	55.9752	66.9576	52.3496
1193	6.53552	64.8415	56.1767	67.1826	52.6897
1194	6.54098	64.0538	54.9802	68.17	55.8148
1195	6.54645	63.7805	55.1279	67.1983	52.6868
1196	6.55191	64.5248	56.0487	65.4379	51.9492
1197	6.55738	64.1757	55.8104	68.208	54.6354
1198	6.56284	64.1271	55.5291	67.7061	53.3312
1199	6.56831	64.7101	56.0218	66.3065	52.137
1200	6.57377	63.7672	54.9915	67.9668	55.043
1201	6.57923	63.6191	54.766	67.142	52.4792
1202	6.5847	63.9039	55.498	65.1795	51.4964
1203	6.59016	64.2978	55.8478	66.7935	52.4697
1204	6.59563	63.8526	55.3065	67.9889	54.5779
1205	6.60109	63.9063	55.5539	66.6982	52.4161
1206	6.60656	64.0695	55.4232	67.3159	52.7584
1207	6.61202	63.6984	54.58	67.6999	55.8558
1208	6.61749	63.7883	54.9839	65.9918	51.4084
1209	6.62295	64.5313	55.4462	66.774	51.8951
1210	6.62842	63.6601	55.0909	67.8366	54.6472
1211	6.63388	63.9883	55.1695	66.9512	52.1927
1212	6.63934	64.1888	55.5905	67.0469	52.513
1213	6.64481	63.4461	54.3205	67.4261	55.662
1214	6.65027	63.1966	54.3754	66.8208	52.2529
1215	6.65574	63.8223	55.4796	64.96	51.4366
1216	6.6612	63.5129	55.1553	67.5913	56.1587
1217	6.66667	63.6658	55.0369	67.4874	53.2946
1218	6.67213	63.9414	55.3831	67.1197	52.6374
1219	6.6776	62.9321	54.2325	66.9002	55.6089
1220	6.68306	63.1671	54.2332	58.9811	54.5763
1221	6.68852	63.1768	55.1421	66.3658	52.4089
1222	6.69399	63.2314	55.1301	67.329	54.2083
1223	6.69945	63.0129	54.6002	67.2109	54.4722
1224	6.70492	63.2953	54.8797	66.5884	52.2729
1225	6.71038	62.8741	54.0834	67.066	53.822
1226	6.71585	62.8148	53.8215	66.6756	52.1679
1227	6.72131	62.9342	54.1584	65.4321	50.7819
1228	6.72678	63.2757	54.7113	66.0569	51.5641
1229	6.73224	63.063	54.2616	67.171	53.3875
1230	6.7377	63.0891	54.4987	66.5732	52.1532
1231	6.74317	63.3276	54.9926	66.5422	52.2896
1232	6.74863	62.7123	53.9038	66.634	55.4071
1233	6.7541	62.8498	53.9584	66.6924	52.2629
1234	6.75956	62.9037	54.8959	66.0446	52.1077
1235	6.76503	62.6611	54.256	66.7258	55.3135
1236	6.77049	62.5142	54.3245	66.3778	52.6775
1237	6.77596	62.751	54.6986	66.4619	52.7315
1238	6.78142	62.1863	53.4102	65.8879	55.3947
1239	6.78689	62.0803	53.3388	66.1998	52.5204
1240	6.79235	62.2462	54.4429	64.6857	51.0241
1241	6.79781	62.4453	54.1597	66.643	54.2986
1242	6.80328	62.1535	54.1202	66.2816	53.3466
1243	6.80874	62.525	54.329	66.3226	52.5352
1244	6.81421	61.9914	53.4445	66.1345	54.1339
1245	6.81967	61.8804	53.2348	66.0785	53.1091
1246	6.82514	62.0956	53.6904	65.2434	50.9099
1247	6.8306	62.4353	54.1456	65.8329	51.6766
1248	6.83607	61.9436	53.6164	66.1411	53.7633
1249	6.84153	61.9576	53.6247	66.0153	52.5407
1250	6.84699	62.2905	54.1794	65.5466	51.5265
1251	6.85246	61.9946	53.0561	65.5168	55.3438
1252	6.85792	62.013	53.002	65.7725	51.1296
1253	6.86339	61.8936	53.6325	65.4322	51.3701
1254	6.86885	61.8454	53.6136	65.7602	55.1348
1255	6.87432	62.0886	53.8329	65.9868	52.2695
1256	6.87978	62.1449	54.2351	66.0997	52.821
1257	6.88525	61.6508	52.6903	65.6522	53.9665
1258	6.89071	61.7732	52.6533	65.7659	51.3503
1259	6.89617	61.7334	53.3127	65.6231	51.7284
1260	6.90164	61.9772	53.3646	66.1671	53.6553
1261	6.9071	61.8184	53.081	65.9793	52.5099
1262	6.91257	62.0558	53.1962	66.1033	52.0748
1263	6.91803	61.8911	52.5558	66.0797	52.8654
1264	6.9235	61.9458	52.1732	65.7649	53.921
1265	6.92896	61.9324	52.6102	65.8498	51.0957
1266	6.93443	61.9833	53.2295	65.7922	51.4597
1267	6.93989	61.6248	52.5298	65.7905	53.0654
1268	6.94536	61.8603	52.5834	66.0257	52.0454
1269	6.95082	61.9958	52.6258	66.0055	51.3757
1270	6.95628	61.6103	51.5243	64.9565	54.0627
1271	6.96175	61.7349	51.7733	65.735	50.4929
1272	6.96721	61.5778	52.9474	65.0391	50.5684
1273	6.97268	61.2933	52.2198	65.2981	53.4855
1274	6.97814	61.1521	52.3782	65.3504	52.2574
1275	6.98361	62.0379	52.5971	65.9014	50.95
1276	6.98907	61.5341	51.4884	65.5129	52.8334
1277	6.99454	61.3255	51.4329	65.5169	51.1636
1278	7	61.3389	51.8871	65.377	50.7324
1279	7.00546	61.4141	52.1089	64.4509	49.2077
1280	7.01093	61.3642	51.8781	65.5632	51.9708
1281	7.01639	61.6862	51.9669	65.8824	52.1467
1282	7.02186	61.5996	51.3997	65.7626	51.9556
1283	7.02732	61.4661	50.752	65.4874	51.964
1284	7.03279	61.7352	51.316	65.3186	49.1252
1285	7.03825	61.4683	51.6753	65.6344	51.143
1286	7.04372	61.521	51.2568	65.5255	52.5235
1287	7.04918	61.4664	51.4668	65.6433	51.0269
1288	7.05464	61.7355	51.33	65.9354	51.3008
1289	7.06011	61.8315	50.9184	65.7329	52.4739
1290	7.06557	61.9661	50.7433	66.1639	50.8773
1291	7.07104	61.5115	51.6486	65.5043	50.3457
1292	7.0765	61.1886	50.7318	64.929	52.6422
1293	7.08197	61.5582	51.0863	65.7535	50.8874
1294	7.08743	61.802	51.3874	65.9579	50.7799
1295	7.0929	61.8467	49.9594	64.6614	53.0767
1296	7.09836	61.8087	50.1898	66.0084	50.1404
1297	7.10383	61.6042	51.2665	65.4452	49.5674
1298	7.10929	61.5074	50.7237	64.6882	53.4664
1299	7.11475	61.493	50.8503	65.6927	50.9027
1300	7.12022	61.8256	51.1626	66.0181	51.4136
1301	7.12568	61.7605	49.6476	65.2263	52.02
1302	7.13115	61.7218	49.5795	65.9102	49.892
1303	7.13661	61.7641	50.3077	65.8368	49.2814
1304	7.14208	61.8226	50.5174	65.7799	51.9243
1305	7.14754	61.6682	49.9716	65.4553	51.7876
1306	7.15301	62.1143	50.3709	66.2719	49.7761
1307	7.15847	61.7947	50.1148	65.7455	51.5399
1308	7.16393	61.9082	49.4761	64.3028	52.9266
1309	7.1694	62.1337	49.7146	66.1654	50.8918
1310	7.17486	61.9405	50.0454	65.7568	51.7993
1311	7.18033	61.5881	49.4558	65.1499	51.6814
1312	7.18579	61.7065	49.7668	65.868	50.3341
1313	7.19126	61.9308	50.1794	66.0553	50.9724
1314	7.19672	61.9236	49.086	64.907	52.0422
1315	7.20219	62.029	49.2301	65.9916	50.622
1316	7.20765	61.3886	49.6365	65.5077	50.4568
1317	7.21311	61.6498	49.528	63.5329	53.2822
1318	7.21858	61.7081	49.5228	65.7379	50.7066
1319	7.22404	61.9277	49.8027	66.1027	50.2606
1320	7.22951	62.0604	48.5897	65.206	51.3727
1321	7.23497	61.9213	48.4027	65.6253	50.3826
1322	7.24044	62.2801	48.6019	66.41	49.366
1323	7.2459	62.1659	49.395	66.2994	48.6508
1324	7.25137	61.8008	48.7493	65.5521	50.6381
1325	7.25683	62.1806	48.7057	65.8448	50.7584
1326	7.2623	61.9548	48.3213	65.646	50.3249
1327	7.26776	62.4017	47.6316	65.1175	50.8354
1328	7.27322	62.2767	48.3928	66.4475	47.8987
1329	7.27869	62.1633	48.4806	66.3094	49.1515
1330	7.28415	61.9988	47.9707	65.6419	50.0606
1331	7.28962	62.143	48.3595	66.2046	49.4288
1332	7.29508	61.9688	48.482	66.0811	49.3358
1333	7.30055	62.4956	47.5124	65.1255	50.7871
1334	7.30601	62.4914	47.4412	66.5261	48.6082
1335	7.31148	61.9613	47.8531	66.1612	47.8703
1336	7.31694	61.8799	47.4709	65.1562	50.0987
1337	7.3224	62.3469	47.7639	66.2485	49.3186
1338	7.32787	62.6056	47.9573	66.7137	48.8314
1339	7.33333	62.8531	46.6756	65.6559	49.8036
1340	7.3388	62.8039	46.8019	66.9104	47.6832
1341	7.34426	62.3302	47.5169	66.4845	48.1348
1342	7.34973	62.5699	47.1887	65.1841	50.4759
1343	7.35519	62.5015	47.2104	66.6737	47.693
1344	7.36066	63.0911	47.2983	67.0304	48.7552
1345	7.36612	62.7088	46.4134	66.199	48.7497
1346	7.37158	62.8378	46.273	66.241	48.7343
1347	7.37705	62.9859	46.7676	67.0294	47.9032
1348	7.38251	62.4871	47.1442	66.5217	48.3112
1349	7.38798	62.3643	46.7018	66.0197	48.7701
1350	7.39344	62.6619	46.9172	66.7958	47.6594
1351	7.39891	62.58	46.8353	66.4243	48.5267
1352	7.40437	62.6552	46.0725	65.4887	49.1727
1353	7.40984	62.8413	46.2138	66.3423	48.5338
1354	7.4153	62.2404	47.0732	66.4378	46.9254
1355	7.42077	62.4798	46.1955	65.2994	49.3083
1356	7.42623	62.6537	46.6722	66.7659	47.5262
1357	7.43169	62.8856	47.3379	66.9675	48.3265
1358	7.43716	63.1258	45.7199	65.0726	49.4415
1359	7.44262	63.0002	45.7726	66.9072	47.3138
1360	7.44809	62.5063	46.3837	66.6054	47.299
1361	7.45355	62.4687	46.0494	64.4044	49.7768
1362	7.45902	62.3459	45.9508	66.2112	47.5939
1363	7.46448	62.6969	46.4144	66.6672	47.7845
1364	7.46995	62.8115	45.168	65.1723	48.6417
1365	7.47541	62.7698	45.2817	66.1409	47.7868
1366	7.48087	63.0554	45.8368	66.3569	48.4329
1367	7.48634	62.701	45.8246	66.1876	48.1663
1368	7.4918	62.4831	45.3806	66.0615	47.5796
1369	7.49727	62.8188	45.8029	66.4369	47.9358
1370	7.50273	62.4844	45.6628	65.0767	48.9674
1371	7.5082	62.968	45.1597	64.2439	49.1612
1372	7.51366	63.0058	45.4163	66.113	48.2422
1373	7.51913	62.3122	45.7741	65.6862	48.2753
1374	7.52459	62.6237	44.9457	64.3025	48.7956
1375	7.53005	62.5977	45.599	66.1991	47.7599
1376	7.53552	62.5486	45.8408	65.2129	49.0876
1377	7.54098	62.9404	45.0588	64.1358	49.0851
1378	7.54645	63.0728	44.9648	65.9671	48.0082
1379	7.55191	62.5419	45.217	66.1669	47.3381
1380	7.55738	62.8514	45.0779	63.3648	49.2464
1381	7.56284	62.8574	45.0512	65.5818	48.2476
1382	7.56831	63.201	45.344	65.9602	48.5105
1383	7.57377	62.9093	44.8111	65.3983	48.1942
1384	7.57923	63.3873	44.1835	63.3554	48.3834
1385	7.5847	63.4106	44.8574	67.2603	46.5365
1386	7.59016	62.9171	45.334	66.4262	47.6419
1387	7.59563	62.899	44.5717	64.4834	48.4614
1388	7.60109	63.3058	44.6507	64.3696	48.7138
1389	7.60656	63.2672	44.6675	65.8089	48.0111
1390	7.61202	63.8094	44.0178	64.7614	48.1085
1391	7.61749	63.9932	44.4798	66.652	47.731
1392	7.62295	63.5198	44.5995	66.1992	47.8339
1393	7.62842	63.7094	44.0524	64.7935	48.11
1394	7.63388	63.6074	44.1038	66.5196	47.1302
1395	7.63934	64.0473	44.8776	65.9195	48.6373
1396	7.64481	64.2891	43.8802	65.1641	47.988
1397	7.65027	64.4105	43.8703	66.1286	47.7028
1398	7.65574	64.3186	43.7272	66.7215	47.1719
1399	7.6612	64.1809	43.8373	65.4927	47.8272
1400	7.66667	64.1283	44.017	66.3659	47.5713
1401	7.67213	64.5106	44.0856	65.8011	48.0825
1402	7.6776	64.5231	43.6531	66.0701	47.5578
1403	7.68306	64.8169	43.4647	64.8952	47.664
1404	7.68852	65.0383	43.8924	65.5687	48.0588
1405	7.69399	64.4418	44.1697	67.0508	47.4612
1406	7.69945	64.5844	43.6332	64.9119	47.8204
1407	7.70492	64.6093	43.7658	65.2751	47.9126
1408	7.71038	64.6103	43.5978	65.1788	47.7591
1409	7.71585	65.173	42.9729	64.816	47.1577
1410	7.72131	65.2158	43.5632	67.5585	47.0491
1411	7.72678	64.6166	43.1512	66.2278	47.0298
1412	7.73224	64.9106	43.0235	61.0903	44.7685
1413	7.7377	64.9789	43.1221	65.4434	47.2964
1414	7.74317	65.4607	43.262	66.7054	47.2734
1415	7.74863	65.6673	42.9422	66.3293	47.0897
1416	7.7541	65.8528	43.0556	65.6304	47.2497
1417	7.75956	65.4344	43.1587	68.155	46.3584
1418	7.76503	65.2947	42.915	64.9494	47.1008
1419	7.77049	65.2273	43.146	64.7597	47.3199
1420	7.77596	65.4486	43.7763	64.8765	47.9372
1421	7.78142	65.5314	42.9596	65.7341	47.1547
1422	7.78689	65.8663	42.8117	64.0729	46.6096
1423	7.79235	66.0743	43.1208	65.6544	47.2997
1424	7.79781	65.4682	43.2732	65.6525	47.4691
1425	7.80328	65.6784	43.2931	64.9748	47.4337
1426	7.80874	65.5648	43.7176	65.6815	47.916
1427	7.81421	65.7068	43.2086	65.2971	47.3886
1428	7.81967	66.0638	42.7054	64.6884	46.6738
1429	7.82514	66.0309	43.7023	61.9289	44.6042
1430	7.8306	65.4687	43.2579	65.5907	47.4562
1431	7.83607	65.951	43.0026	64.5868	46.9749
1432	7.84153	65.7734	43.1215	66.0151	47.3145
1433	7.84699	66.3421	43.3282	65.0209	47.315
1434	7.85246	66.2578	43.1495	65.9519	47.3383
1435	7.85792	66.2873	43.3638	64.2504	47.0368
1436	7.86339	66.3038	43.1643	64.7846	47.08
1437	7.86885	66.4457	42.8538	65.095	46.8307
1438	7.87432	66.3519	43.3908	64.9644	47.355
1439	7.87978	66.3902	43.6551	65.2127	47.6867
1440	7.88525	66.3337	43.114	65.6197	47.2529
1441	7.89071	66.5663	42.8793	64.532	46.5537
1442	7.89617	66.8403	43.101	64.7975	46.7707
1443	7.90164	66.4943	43.1357	65.0513	47.08
1444	7.9071	66.5068	43.1821	65.8322	47.3276
1445	7.91257	66.6936	43.3953	64.221	46.7903
1446	7.91803	66.7901	42.8998	65.2948	46.8246
1447	7.9235	67.3059	42.8772	65.0499	46.4199
1448	7.92896	67.2146	43.2506	65.603	47.129
1449	7.93443	66.7227	43.1115	66.3671	47.2964
1450	7.93989	67.1653	42.9961	64.6291	46.3438
1451	7.94536	67.1468	43.1191	65.562	47.0086
1452	7.95082	67.3053	43.1086	65.5663	46.9316
1453	7.95628	67.8262	42.9279	65.084	46.1091
1454	7.96175	67.644	43.2782	64.3422	45.8739
1455	7.96721	67.8212	43.5342	64.9334	46.5838
1456	7.97268	67.6607	42.9531	66.0313	46.8242
1457	7.97814	67.6453	42.9058	66.2414	46.8642
1458	7.98361	67.971	43.4585	65.1911	46.6068
1459	7.98907	67.912	42.8319	66.7294	46.862
1460	7.99454	68.0462	42.9656	64.4374	45.1142
1461	8	68.2702	43.1523	65.3446	46.1658
1462	8.00546	67.9215	42.6173	66.2728	46.4802
1463	8.01093	68.0711	42.8852	66.261	46.6752
1464	8.01639	68.1477	43.2156	65.9621	46.8021
1465	8.02186	68.4051	42.4942	66.2418	46.0942
1466	8.02732	68.4789	42.1337	66.5261	45.8521
1467	8.03279	68.3547	42.8758	65.2856	40.0086
1468	8.03825	68.1939	42.495	65.3199	45.5576
1469	8.04372	68.3811	42.5531	65.7209	45.8032
1470	8.04918	68.2274	42.6885	65.066	45.4534
1471	8.05464	68.7736	42.6469	65.4151	45.1691
1472	8.06011	68.9717	42.6076	65.9496	45.5242
1473	8.06557	68.7193	42.8756	65.7399	45.8358
1474	8.07104	68.8924	42.718	65.6251	45.357
1475	8.0765	68.8127	42.1915	66.1376	45.4294
1476	8.08197	68.6911	42.2986	65.9502	45.481
1477	8.08743	68.7372	43.0955	64.9751	44.9629
1478	8.0929	69.1778	42.4732	66.5198	45.7252
1479	8.09836	69.112	42.9958	65.0526	44.0734
1480	8.10383	69.1442	43.2288	65.9498	45.9556
1481	8.10929	68.9985	42.5005	66.7438	46.044
1482	8.11475	69.0479	42.6275	65.6458	45.0904
1483	8.12022	68.8724	43.1022	65.3347	45.3659
1484	8.12568	69.2738	42.4728	66.0419	45.1551
1485	8.13115	69.4121	42.627	65.4933	44.1379
1486	8.13661	69.0095	43.3282	64.8257	42.9603
1487	8.14208	69.1084	42.7257	65.7793	45.2863
1488	8.14754	68.8659	42.9968	65.2678	45.1633
1489	8.15301	68.7444	42.9407	65.5839	45.7068
1490	8.15847	69.0874	42.7565	65.5962	45.0915
1491	8.16393	69.4591	43.0107	65.4094	44.1242
1492	8.1694	68.8298	43.6484	69.938	39.5972
1493	8.17486	69.1157	43.5115	65.575	45.7708
1494	8.18033	69.4016	42.8228	65.5794	44.5637
1495	8.18579	69.0333	42.919	65.2833	44.8106
1496	8.19126	68.9907	43.2178	64.9222	44.2604
1497	8.19672	69.7614	43.3413	65.608	43.965
1498	8.20219	69.0503	43.3894	64.8529	43.2416
1499	8.20765	69.2202	43.5337	65.0323	43.8525
1500	8.21311	69.7542	42.4438	66.312	44.8503
1501	8.21858	69.2552	42.7599	65.0552	42.75
1502	8.22404	68.9746	43.4852	64.9375	42.3266
1503	8.22951	69.8186	43.0483	65.8037	44.2814
1504	8.23497	69.0662	43.5174	71.9555	40.4692
1505	8.24044	68.8548	43.6829	64.7349	44.499
1506	8.2459	69.9812	43.1626	65.9467	44.3299
1507	8.25137	69.3444	43.1704	73.5442	43.1319
1508	8.25683	68.9895	43.5158	64.7925	43.6737
1509	8.2623	69.8688	43.5145	65.6719	43.6775
1510	8.26776	69.4675	43.6845	73.3055	41.9788
1511	8.27322	68.7647	43.9287	70.8578	40.2874
1512	8.27869	68.8325	44.2652	64.7481	43.2867
1513	8.28415	69.5437	43.5539	65.3479	43.3663
1514	8.28962	69.1959	43.5122	65.0062	43.8061
1515	8.29508	69.0636	43.8241	65.0828	42.485
1516	8.30055	69.7119	44.1103	65.5693	43.4182
1517	8.30601	68.8778	44.2837	71.0751	40.7043
1518	8.31148	68.6185	44.4813	64.8971	42.5341
1519	8.31694	70.0226	43.7727	65.8529	44.2762
1520	8.3224	69.2083	43.8582	73.3787	43.3607
1521	8.32787	68.6063	44.2653	65.3963	41.5568
1522	8.33333	69.6461	44.33	65.6401	43.0681
1523	8.3388	68.8172	44.3983	73.0041	44.0669
1524	8.34426	68.3236	44.5471	65.441	41.4925
1525	8.34973	69.5302	44.2823	65.3781	43.6495
1526	8.35519	69.3945	44.0791	71.5616	47.6769
1527	8.36066	68.8694	44.3939	67.8766	40.3129
1528	8.36612	69.5268	44.6279	65.7357	42.8203
1529	8.37158	68.7912	44.461	72.8966	45.3473
1530	8.37705	68.2623	44.6401	65.8977	41.1689
1531	8.38251	68.3671	44.9107	65.4423	41.8965
1532	8.38798	69.5102	44.5124	65.4777	43.3382
1533	8.39344	68.7612	44.2722	69.7826	40.1983
1534	8.39891	69.0376	44.4827	65.5431	42.1528
1535	8.40437	69.2509	44.4775	65.8308	42.0396
1536	8.40984	68.3527	44.6711	72.4621	43.8035
1537	8.4153	68.3178	44.8713	67.1772	40.8292
1538	8.42077	69.6149	44.662	66.0548	42.4336
1539	8.42623	69.0306	44.427	72.9455	45.948
1540	8.43169	68.5636	44.4006	68.0132	40.2369
1541	8.43716	69.3982	44.8571	67.1815	41.2897
1542	8.44262	68.2294	44.5608	72.3117	45.5482
1543	8.44809	67.9249	44.6267	67.259	40.4798
1544	8.45355	69.2034	44.8597	66.1457	41.9803
1545	8.45902	68.9983	44.7405	72.7546	46.6194
1546	8.46448	68.5016	45.0051	68.9317	40.8271
1547	8.46995	68.8933	45.464	67.4449	41.5216
1548	8.47541	68.2686	44.8089	71.1232	47.8898
1549	8.48087	67.6242	44.7479	71.8158	45.0141
1550	8.48634	68.0807	45.1689	66.4607	41.2939
1551	8.4918	68.9224	45.2866	66.6094	41.7809
1552	8.49727	68.3217	45.0173	71.5657	42.3496
1553	8.50273	68.442	45.0366	67.7037	40.902
1554	8.5082	68.2179	45.0353	68.8241	40.8793
1555	8.51366	67.5432	44.9493	71.2053	42.8928
1556	8.51913	67.4444	45.2198	68.2058	41.0894
1557	8.52459	68.7838	45.3241	67.1192	41.4681
1558	8.53005	67.8769	44.94	71.7455	43.3049
1559	8.53552	67.8575	44.8655	68.0787	40.6714
1560	8.54098	68.2481	45.4597	68.3204	41.2604
1561	8.54645	67.3529	44.5398	70.2973	47.5349
1562	8.55191	67.1225	44.5184	69.0414	40.7823
1563	8.55738	67.8697	44.9081	67.5744	40.7185
1564	8.56284	67.5823	44.8853	71.3497	43.0288
1565	8.56831	67.4887	44.7133	69.29	40.9192
1566	8.57377	67.7824	44.8949	68.957	40.8625
1567	8.57923	66.9554	44.4427	70.3906	42.0262
1568	8.5847	66.5952	43.9397	70.2352	46.0349
1569	8.59016	66.6674	44.2224	67.9131	40.2113
1570	8.59563	67.7543	44.6385	66.7447	40.5616
1571	8.60109	66.8412	44.2794	70.1135	41.6465
1572	8.60656	66.8851	44.3058	68.1111	40.2887
1573	8.61202	66.6603	44.1843	68.8172	40.5805
1574	8.61749	66.0222	43.7797	69.8765	42.1109
1575	8.62295	65.7741	44.3532	68.0304	40.8108
1576	8.62842	67.0971	45.127	66.4795	40.9726
1577	8.63388	66.3917	44.3787	70.5429	43.7404
1578	8.63934	66.3024	44.383	68.9232	41.101
1579	8.64481	66.652	45.1377	67.5539	41.0357
1580	8.65027	65.8391	44.0053	69.9895	44.6488
1581	8.65574	65.6081	44.1143	68.2642	40.8608
1582	8.6612	66.5731	45.053	66.8732	40.8637
1583	8.66667	66.3137	44.5708	70.5043	44.2913
1584	8.67213	65.9623	44.8762	68.5799	41.5917
1585	8.6776	66.6527	45.0622	67.7206	41.0002
1586	8.68306	65.572	44.2807	69.6486	43.2704
1587	8.68852	65.4397	44.1315	68.9343	41.8018
1588	8.69399	65.7812	44.664	68.0167	41.1083
1589	8.69945	66.1113	45.0045	68.327	41.4365
1590	8.70492	65.8109	44.5094	69.7496	43.0512
1591	8.71038	65.9241	44.9703	67.9593	41.2963
1592	8.71585	65.4897	44.5622	68.9508	42.183
1593	8.72131	65.1187	44.2502	69.2903	43.7629
1594	8.72678	65.1641	44.3337	68.8477	42.316
1595	8.73224	66.0498	45.1264	67.696	41.2624
1596	8.7377	65.1828	44.6442	69.2333	43.5337
1597	8.74317	65.0733	44.7632	68.6007	42.4834
1598	8.74863	65.2674	45.2469	67.7838	41.8842
1599	8.7541	64.664	44.1532	68.8289	44.6953
1600	8.75956	64.5077	44.1348	67.8097	41.5392
1601	8.76503	64.9132	45.1596	67.1045	41.5766
1602	8.77049	64.6935	44.4391	68.4961	46.2224
1603	8.77596	64.8318	44.2261	67.8067	41.2614
1604	8.78142	65.3766	44.764	67.2702	41.0152
1605	8.78689	64.6057	43.5819	68.8049	43.5012
1606	8.79235	64.2073	43.3558	67.9745	41.4989
1607	8.79781	63.9734	43.9203	67.4948	41.6313
1608	8.80328	64.9046	44.3031	66.4158	40.3844
1609	8.80874	64.2683	44.098	68.1804	42.5699
1610	8.81421	64.4363	44.1911	67.9225	41.8488
1611	8.81967	64.4562	43.3397	68.6561	43.3194
1612	8.82514	64.0377	42.9438	68.2183	42.5402
1613	8.8306	64.1348	43.3033	67.281	40.521
1614	8.83607	64.7388	44.3343	66.7208	40.6313
1615	8.84153	64.0332	43.504	68.2199	43.8375
1616	8.84699	64.1768	43.6109	67.8193	41.5199
1617	8.85246	64.6632	43.923	67.4661	40.7951
1618	8.85792	63.8182	42.76	67.8215	44.0301
1619	8.86339	64.0148	42.5107	67.3251	39.9257
1620	8.86885	64.0418	43.5971	66.92	40.5383
1621	8.87432	64.009	43.3486	67.6771	45.3943
1622	8.87978	63.912	43.3155	67.9245	42.0744
1623	8.88525	64.5726	43.5872	67.5062	40.5816
1624	8.89071	63.8587	42.5356	68.0109	43.1672
1625	8.89617	63.8768	42.3729	67.8085	40.8958
1626	8.90164	64.0474	42.6364	67.1979	39.8589
1627	8.9071	64.2119	43.2491	67.9018	41.2428
1628	8.91257	64.0481	43.0118	68.1126	41.9538
1629	8.91803	64.227	43.1551	67.9955	41.301
1630	8.9235	63.8279	43.0124	67.6835	41.3469
1631	8.92896	63.5811	42.2532	67.4484	43.8915
1632	8.93443	63.9202	42.4788	67.6019	40.4576
1633	8.93989	64.1532	43.5832	66.9342	40.4357
1634	8.94536	63.9873	42.7166	67.9613	44.0759
1635	8.95082	63.8354	43.0736	67.5747	41.1611
1636	8.95628	63.8463	43.0317	67.9297	42.0489
1637	8.96175	63.3651	42.2386	67.4326	43.2852
1638	8.96721	63.6461	42.2824	67.4888	40.5872
1639	8.97268	63.6298	43.5518	66.9574	40.9891
1640	8.97814	63.3856	42.3992	67.1542	44.2533
1641	8.98361	63.0968	42.5212	67.1566	41.445
1642	8.98907	63.9937	43.163	66.2976	39.6513
1643	8.99454	63.3804	41.6428	67.2537	43.2667
1644	9	62.995	41.5433	67.1062	40.6845
1645	9.00546	63.1152	42.0869	66.5542	39.6758
1646	9.01093	63.1801	42.3581	67.1071	40.8685
1647	9.01639	63.0364	42.1904	67.0892	41.088
1648	9.02186	63.2331	42.4684	67.0228	40.658
1649	9.02732	62.9329	41.7379	67.1173	41.376
1650	9.03279	62.5906	41.2489	66.7906	41.2522
1651	9.03825	63.0224	41.5796	66.8393	39.827
1652	9.04372	63.1331	42.5624	66.4825	40.0283
1653	9.04918	62.8484	42.0237	66.9845	42.7535
1654	9.05464	62.8878	41.84	67.0741	41.5007
1655	9.06011	63.039	42.2908	66.9537	40.7693
1656	9.06557	62.7613	41.1563	66.386	43.278
1657	9.07104	62.9606	41.2685	66.8387	39.656
1658	9.0765	62.8019	42.4447	66.319	40.1491
1659	9.08197	62.8923	41.5667	66.3952	43.884
1660	9.08743	62.9048	41.3212	67.0949	41.0329
1661	9.0929	63.1577	41.6448	67.1337	40.2916
1662	9.09836	62.8657	40.9582	66.9845	41.78
1663	9.10383	62.904	40.5778	67.0431	41.2905
1664	9.10929	62.9862	40.688	67.1181	39.9351
1665	9.11475	62.9525	41.6006	66.4613	39.2922
1666	9.12022	62.8635	41.3065	67.0199	41.9098
1667	9.12568	63.2759	41.6534	67.3479	40.6243
1668	9.13115	62.973	40.5719	66.8748	42.1264
1669	9.13661	62.6184	40.2258	66.7928	39.7628
1670	9.14208	63.1212	40.5222	66.786	38.4706
1671	9.14754	63.1981	41.3746	67.0204	39.6338
1672	9.15301	62.7953	40.6641	66.9842	40.9695
1673	9.15847	62.7332	40.6659	66.8775	39.9841
1674	9.16393	62.8079	40.6444	66.9605	40.0147
1675	9.1694	62.647	39.6938	66.0645	42.1353
1676	9.17486	62.8813	40.272	66.6214	38.3611
1677	9.18033	62.946	41.274	66.6717	39.3352
1678	9.18579	62.6122	40.3044	66.6439	41.4816
1679	9.19126	62.7752	40.4376	66.9051	39.6733
1680	9.19672	62.8135	40.7951	66.9646	40.1557
1681	9.20219	63.0241	39.7206	66.7218	41.7123
1682	9.20765	62.8446	39.5798	67.0366	39.3211
1683	9.21311	62.9392	40.4997	66.3099	37.9941
1684	9.21858	62.9684	40.1929	66.9408	41.5569
1685	9.22404	62.9392	40.3341	66.8857	38.8969
1686	9.22951	63.4041	40.4324	67.5962	40.1748
1687	9.23497	62.9347	39.4571	67.0413	40.3381
1688	9.24044	62.9387	39.0572	67.1251	38.7202
1689	9.2459	62.9595	39.2535	67.0131	38.1542
1690	9.25137	63.0437	40.398	66.3074	37.7545
1691	9.25683	62.7047	39.8364	66.4508	41.7355
1692	9.2623	63.0709	39.6455	67.2436	40.1236
1693	9.26776	63.073	39.6824	67.2155	38.9898
1694	9.27322	62.8662	38.4058	66.1339	41.0444
1695	9.27869	62.7747	38.6135	66.7603	37.2889
1696	9.28415	63.0288	39.8456	66.6406	37.7019
1697	9.28962	62.8467	38.9988	66.6366	40.8089
1698	9.29508	62.7926	38.759	66.9887	38.9394
1699	9.30055	62.8168	39.324	66.7989	37.9887
1700	9.30601	62.9087	38.2049	66.6504	40.1126
1701	9.31148	62.5886	38.0323	66.7826	37.8086
1702	9.31694	62.8868	38.7926	66.6712	36.971
1703	9.3224	62.6562	38.451	66.7455	39.4088
1704	9.32787	62.4185	38.4458	66.6183	38.4832
1705	9.33333	63.156	39.1303	66.8376	37.1089
1706	9.3388	62.7673	37.8908	66.7561	39.206
1707	9.34426	62.2813	37.4074	66.4689	37.7289
1708	9.34973	62.4694	37.6479	66.4404	36.2803
1709	9.35519	62.2227	38.4701	65.9142	36.4668
1710	9.36066	61.9488	38.2824	66.127	38.7103
1711	9.36612	62.5237	38.3587	66.708	37.9969
1712	9.37158	62.0981	37.9971	66.2933	37.7952
1713	9.37705	62.0046	37.2579	66.0595	38.3524
1714	9.38251	62.289	37.4057	66.4271	36.6877
1715	9.38798	62.1574	38.5121	65.9119	36.6296
1716	9.39344	61.7746	37.5855	65.5973	39.3253
1717	9.39891	61.8749	37.5667	66.0708	37.3802
1718	9.40437	61.7173	37.8474	65.8954	37.4189
1719	9.40984	62.1147	36.6765	64.1347	40.3588
1720	9.4153	62.2327	36.8213	66.427	37.0402
1721	9.42077	61.5067	37.6773	65.6794	37.1989
1722	9.42623	61.797	37.2059	64.5069	40.4147
1723	9.43169	61.9686	37.2898	66.1675	37.3838
1724	9.43716	62.2726	37.9488	66.3125	36.8002
1725	9.44262	62.1181	36.7507	65.6334	39.0491
1726	9.44809	62.2329	36.6443	66.2525	37.862
1727	9.45355	61.7238	37.3347	65.9035	36.9216
1728	9.45902	62.0368	37.3431	65.5145	39.6981
1729	9.46448	61.9455	37.1704	66.1033	37.7641
1730	9.46995	62.3363	37.3788	66.5342	37.5137
1731	9.47541	62.176	36.6275	66.2037	37.8181
1732	9.48087	62.0823	36.1849	65.9055	37.9236
1733	9.48634	62.1929	36.5029	66.3828	36.2124
1734	9.4918	62.1213	37.4795	66.3035	37.0932
1735	9.49727	62.0148	36.8091	65.8549	38.5101
1736	9.50273	62.0579	36.8729	66.1849	37.6522
1737	9.5082	62.2326	36.7998	65.7072	39.1593
1738	9.51366	62.2752	35.6344	65.3804	38.4624
1739	9.51913	62.3541	36.0478	66.549	35.8412
1740	9.52459	62.0401	37.0604	66.1253	36.0856
1741	9.53005	62.0401	36.397	65.0549	39.3211
1742	9.53552	62.1213	36.4795	66.1901	37.5212
1743	9.54098	62.4461	36.7992	66.6412	37.0032
1744	9.54645	62.3813	35.4848	65.8481	37.8557
1745	9.55191	62.5101	35.5357	66.6962	35.1939
1746	9.55738	62.3401	35.6165	66.5292	35.9188
1747	9.56284	61.9542	35.6635	66.1202	36.1967
1748	9.56831	62.0694	35.6883	66.0854	36.9178
1749	9.57377	62.4712	36.1524	66.5913	36.9676
1750	9.57923	62.4788	35.1817	65.6205	37.9691
1751	9.5847	62.4673	34.6054	66.215	36.5014
1752	9.59016	62.4891	35.4027	66.5946	34.5168
1753	9.59563	62.225	35.804	66.4233	35.9236
1754	9.60109	62.1996	35.5045	65.9589	37.3774
1755	9.60656	62.1472	35.504	66.2791	36.2571
1756	9.61202	62.2391	35.2067	66.1647	36.6998
1757	9.61749	62.689	34.4459	65.3307	37.7111
1758	9.62295	62.7377	34.6214	66.815	35.6291
1759	9.62842	61.7766	35.4343	65.9691	35.1831
1760	9.63388	62.1452	34.7498	64.2782	38.3678
1761	9.63934	62.0521	34.7389	65.7477	36.7344
1762	9.64481	62.0804	35.3157	66.2292	35.9698
1763	9.65027	62.8813	34.2062	64.3875	38.1268
1764	9.65574	62.7684	33.8734	66.202	36.2922
1765	9.6612	62.323	34.4983	66.518	34.7041
1766	9.66667	62.1114	34.0676	65.2579	36.8496
1767	9.67213	62.2617	34.5144	66.3532	35.4633
1768	9.6776	62.5782	34.8113	66.3325	36.6943
1769	9.68306	62.6202	33.7265	65.563	36.7231
1770	9.68852	62.7414	33.3136	66.1255	35.8012
1771	9.69399	62.8196	33.5508	66.7938	34.9093
1772	9.69945	62.3792	34.0602	66.5391	34.6389
1773	9.70492	62.2143	33.8777	65.4372	36.5709
1774	9.71038	62.5782	33.8113	65.4453	36.8805
1775	9.71585	62.637	33.5814	66.2028	35.8008
1776	9.72131	62.7807	33.1226	65.0641	36.6476
1777	9.72678	62.8822	33.5299	66.7158	35.2458
1778	9.73224	62.1327	34.4745	66.3106	34.904
1779	9.7377	62.4296	33.7078	64.2755	37.4804
1780	9.74317	62.5309	33.9377	66.4316	35.4948
1781	9.74863	62.5453	33.7863	65.8974	36.3169
1782	9.7541	62.9178	33.1868	65.5035	36.4966
1783	9.75956	63.3146	33.1744	65.5713	36.7166
1784	9.76503	62.6521	33.2856	65.9895	35.8355
1785	9.77049	62.6288	32.9116	64.7301	36.5482
1786	9.77596	62.7164	32.7945	66.0727	35.3193
1787	9.78142	63.0412	33.6199	67.199	34.2143
1788	9.78689	63.3152	32.8371	65.3187	36.5284
1789	9.79235	63.2297	32.5671	66.3488	35.3798
1790	9.79781	63.3341	32.6515	66.2809	35.6441
1791	9.80328	62.5598	32.891	66.2991	34.8033
1792	9.80874	62.872	33.0316	65.1987	36.5283
1793	9.81421	62.8814	33.0226	65.1558	36.5535
1794	9.81967	62.7208	32.8378	65.5365	35.9542
1795	9.82514	63.1287	31.9088	64.1007	35.9948
1796	9.8306	63.2588	32.5279	66.5631	35.1206
1797	9.83607	62.7704	33.1183	65.1358	36.5889
1798	9.84153	62.9845	32.2716	63.8444	36.3826
1799	9.84699	62.8755	32.0845	64.8609	35.7856
1800	9.85246	62.8733	32.4741	65.3962	35.8319
1801	9.85792	63.5557	31.8083	63.6758	36.0066
1802	9.86339	63.578	31.9999	65.4711	35.7491
1803	9.86885	63.4821	32.1304	66.0676	35.4403
1804	9.87432	63.1801	31.9085	65.0263	35.681
1805	9.87978	63.2853	31.8807	65.777	35.2617
1806	9.88525	63.5682	32.2158	66.3439	35.3679
1807	9.89071	63.9063	31.9335	65.6852	35.7381
1808	9.89617	63.7509	31.8346	65.8451	35.4752
1809	9.90164	64.117	31.8562	65.2572	35.8985
1810	9.9071	63.3817	32.0044	66.4174	34.9069
1811	9.91257	63.6696	32.0959	64.6729	36.1743
1812	9.91803	63.6999	32.2654	65.4467	36.085
1813	9.9235	63.8112	31.7932	64.8129	35.872
1814	9.92896	64.3888	31.135	63.7789	35.2904
1815	9.93443	64.6487	31.5873	67.1448	34.965
1816	9.93989	63.5619	31.9835	66.9886	34.4121
1817	9.94536	63.8021	31.5387	64.128	35.726
1818	9.95082	63.9871	31.6919	65.2294	35.7039
1819	9.95628	63.7011	31.9566	65.7627	35.6158
1820	9.96175	64.6504	31.0642	63.8349	35.1843
1821	9.96721	64.6359	31.6312	67.6036	34.6032
1822	9.97268	64.2895	31.6163	66.0256	35.4407
1823	9.97814	64.1644	30.9689	64.6759	35.1376
1824	9.98361	64.4298	31.3372	66.6933	34.8751
1825	9.98907	64.3417	31.5153	66.0331	35.3596
1826	9.99454	64.1626	31.0929	65.3174	35.131
1827	10	64.3055	31.0028	63.2375	35.0647
1828	10.0055	64.5553	31.2353	63.4723	35.2932
1829	10.0109	63.7158	31.1092	65.4988	34.9119
1830	10.0164	64.241	30.9139	63.7152	35.0809
1831	10.0219	64.3802	31.4294	64.7096	35.6165
1832	10.0273	64.03	30.774	64.7003	34.9201
1833	10.0328	64.4346	30.4917	63.0124	34.4435
1834	10.0383	64.5217	31.0195	63.7143	35.1412
1835	10.0437	64.4464	30.924	64.0219	35.1025
1836	10.0492	64.4458	30.8616	64.7529	35.0504
1837	10.0546	64.5264	31.2312	64.6913	35.428
1838	10.0601	64.4776	30.5745	64.7313	34.7668
1839	10.0656	64.8835	30.4006	62.8397	34.0698
1840	10.071	65.1519	30.9392	63.2114	34.664
1841	10.0765	64.4879	30.8194	65.0208	34.9854
1842	10.082	64.6723	30.4604	64.0061	34.6072
1843	10.0874	64.8144	30.5434	64.4909	34.731
1844	10.0929	64.9564	30.6189	63.452	34.5402
1845	10.0984	65.37	30.6829	63.8177	34.5855
1846	10.1038	65.2802	30.8225	64.689	34.9807
1847	10.1093	65.3567	30.3802	64.8017	34.5434
1848	10.1148	65.1464	29.9154	64.6306	34.0836
1849	10.1202	65.088	30.2734	64.3728	34.412
1850	10.1257	65.3343	31.0728	62.5074	34.179
1851	10.1311	65.2628	30.5339	64.7427	34.7015
1852	10.1366	65.4567	30.4032	63.4272	34.0803
1853	10.1421	65.5051	31.0233	62.8222	34.2547
1854	10.1475	65.0701	30.3143	64.8937	34.5106
1855	10.153	65.2028	30.4253	62.9285	33.9562
1856	10.1585	65.2363	30.8437	63.5176	34.676
1857	10.1639	65.3125	30.1013	63.8703	34.0459
1858	10.1694	66.0455	30.3305	62.4221	32.4544
1859	10.1749	65.7294	31.0498	63.4845	34.5995
1860	10.1803	65.4003	30.5384	63.2073	34.1203
1861	10.1858	65.5705	30.1633	63.5325	33.8357
1862	10.1913	65.279	30.7953	62.3427	33.7983
1863	10.1967	66.023	30.8391	62.8027	33.5353
1864	10.2022	66.2247	30.7826	64.1059	34.409
1865	10.2077	66.1353	31.273	62.5269	33.4222
1866	10.2131	66.2401	31.057	63.9311	34.5654
1867	10.2186	66.2915	30.5632	64.1575	34.1806
1868	10.224	66.0136	30.9249	65.1236	35.0295
1869	10.2295	65.9577	31.2612	63.4155	34.6044
1870	10.235	66.2906	30.9486	63.333	33.9306
1871	10.2404	66.1738	31.3953	62.1594	32.6303
1872	10.2459	66.2768	31.7476	62.972	34.3395
1873	10.2514	66.1053	30.7688	63.822	34.2939
1874	10.2568	66.1197	30.9365	62.553	33.1543
1875	10.2623	66.1044	31.473	62.2455	33.131
1876	10.2678	66.6769	30.5699	63.5965	33.4249
1877	10.2732	66.9459	31.0323	62.7734	31.5122
1878	10.2787	66.7646	31.67	62.6353	32.4374
1879	10.2842	66.9788	31.1325	63.7193	33.7812
1880	10.2896	66.8295	30.9599	63.3048	33.2438
1881	10.2951	66.5489	30.8671	63.4504	33.7025
1882	10.3005	66.9335	31.1832	62.8568	32.1936
1883	10.306	67.2837	31.2704	63.7013	33.4628
1884	10.3115	66.7786	31.7669	62.689	32.7236
1885	10.3169	66.9221	31.6912	63.549	34.1937
1886	10.3224	67.0143	31.0481	63.7783	33.7255
1887	10.3279	66.8279	31.1883	63.2914	33.454
1888	10.3333	66.6895	31.9558	62.642	33.0775
1889	10.3388	67.0167	31.7705	63.5573	34.1522
1890	10.3443	66.7895	31.9079	62.6317	32.5018
1891	10.3497	66.8724	32.3089	62.7187	32.931
1892	10.3552	67.0537	31.2348	64.2695	34.3793
1893	10.3607	67.0342	31.3955	63.1345	32.9552
1894	10.3661	66.4824	31.9628	62.4518	33.1435
1895	10.3716	67.479	31.3214	63.7674	33.2872
1896	10.377	67.1896	31.9796	67.2075	27.7796
1897	10.3825	66.5769	32.5047	62.4044	32.9845
1898	10.388	67.1778	32.2041	63.1329	33.3349
1899	10.3934	66.8903	31.9945	62.9903	33.5533
1900	10.3989	66.5579	32.4665	62.3582	32.5152
1901	10.4044	67.1861	32.2017	63.0843	33.1044
1902	10.4098	67.1571	32.7814	62.9647	32.5281
1903	10.4153	66.6406	33.2315	62.4759	32.6883
1904	10.4208	66.8234	33.3646	62.6706	33.9926
1905	10.4262	67.0791	32.5465	63.2164	34.1956
1906	10.4317	66.6384	32.7175	62.5923	33.8442
1907	10.4372	66.8998	32.7979	62.9135	34.1204
1908	10.4426	67.4492	32.6853	63.2925	33.287
1909	10.4481	67.0312	32.9485	66.2762	28.8169
1910	10.4536	66.8482	33.3404	63.2252	31.2159
1911	10.459	67.49	32.4542	63.4189	33.4868
1912	10.4645	67.0773	32.7029	62.9616	31.8657
1913	10.4699	66.7782	33.278	62.8513	31.7883
1914	10.4754	67.6812	33.0387	63.4841	33.1956
1915	10.4809	67.1134	33.339	63.653	30.9587
1916	10.4863	66.6592	33.4756	62.8981	31.6064
1917	10.4918	67.0636	33.4845	62.8642	33.4146
1918	10.4973	67.33	32.8929	63.1302	32.8528
1919	10.5027	66.6944	33.1947	62.8355	31.5367
1920	10.5082	67.3391	33.5235	63.4344	31.9764
1921	10.5137	67.331	33.5807	63.1824	32.9254
1922	10.5191	66.8589	33.5323	71.0444	33.8803
1923	10.5246	66.5112	34.2087	63.7006	31.0877
1924	10.5301	67.5285	33.4393	63.3574	32.9477
1925	10.5355	67.1272	33.609	63.2088	32.097
1926	10.541	66.9187	33.9724	63.2863	31.8638
1927	10.5464	67.8167	34.1297	63.9286	32.5415
1928	10.5519	66.7973	34.3334	70.9167	33.5148
1929	10.5574	66.4073	34.389	62.8604	32.1396
1930	10.5628	67.8674	34.188	63.8525	32.9549
1931	10.5683	67.2704	34.2084	71.4697	34.1298
1932	10.5738	66.6739	34.5837	65.552	30.5363
1933	10.5792	67.5044	34.9588	63.922	32.7663
1934	10.5847	66.7726	34.7403	70.9679	34.5419
1935	10.5902	66.4185	34.663	64.6887	30.8358
1936	10.5956	67.2378	34.9171	63.8355	32.4545
1937	10.6011	67.349	34.6603	66.0244	30.6746
1938	10.6066	66.6794	34.9736	66.5013	30.7774
1939	10.612	67.1206	35.1703	63.8614	32.5212
1940	10.6175	66.512	35.0676	66.2302	30.877
1941	10.623	65.9388	34.8795	68.4263	31.4954
1942	10.6284	65.8808	35.1695	63.7447	31.5533
1943	10.6339	67.1257	34.9434	63.5544	32.7329
1944	10.6393	66.4363	34.8917	66.1926	30.6988
1945	10.6448	66.3894	35.0684	63.7225	31.8237
1946	10.6503	66.7954	35.3342	63.9152	32.2774
1947	10.6557	65.5628	35.2524	69.7504	35.5755
1948	10.6612	65.5329	35.2011	62.5197	32.2752
1949	10.6667	66.7446	35.4733	63.508	32.7966
1950	10.6721	66.424	35.1021	68.9633	38.4475
1951	10.6776	65.7879	35.1987	66.545	31.0675
1952	10.6831	66.7107	35.5503	63.9493	32.3857
1953	10.6885	65.6949	35.3773	69.8864	35.1096
1954	10.694	65.1608	35.4322	66.7258	31.5347
1955	10.6995	65.3667	35.5631	62.9293	32.1428
1956	10.7049	66.2035	35.4969	63.6201	32.1854
1957	10.7104	65.2211	35.3962	67.4309	31.8245
1958	10.7158	65.3709	35.9161	64.5817	31.7909
1959	10.7213	65.3785	35.5723	62.6783	32.3553
1960	10.7268	64.6479	35.4612	68.0902	33.0548
1961	10.7322	64.5289	35.8757	64.9817	31.7002
1962	10.7377	65.6228	36.0546	63.4533	32.4583
1963	10.7432	65.023	35.6939	67.2865	32.156
1964	10.7486	64.8012	36.0641	65.1153	31.8759
1965	10.7541	65.5009	36.235	64.0549	32.2917
1966	10.7596	64.1971	35.7684	68.1323	37.2361
1967	10.765	64.3484	35.8663	64.1383	31.6715
1968	10.7705	65.071	36.3937	64.155	32.2948
1969	10.776	64.9002	36.0428	68.7437	37.7361
1970	10.7814	64.5243	36.0562	67.2191	32.8346
1971	10.7869	65.1324	36.6506	64.4699	32.5032
1972	10.7923	63.9675	36.3821	67.8199	34.7091
1973	10.7978	63.5852	36.0462	66.4722	32.9958
1974	10.8033	63.8228	36.2636	63.9503	32.0655
1975	10.8087	64.4599	36.7709	64.1791	32.5803
1976	10.8142	63.9865	36.3301	66.9017	33.3066
1977	10.8197	64.1677	36.5814	64.0407	32.3833
1978	10.8251	64.3484	36.3483	65.0322	32.2044
1979	10.8306	63.6055	36.087	67.4077	34.3027
1980	10.8361	63.6428	36.3283	65.7945	32.7213
1981	10.8415	64.5659	36.9836	64.7481	32.7876
1982	10.847	63.8496	36.3205	67.3836	34.0509
1983	10.8525	63.8067	36.432	65.3067	32.5089
1984	10.8579	64.4034	37.1823	64.3461	32.9827
1985	10.8634	63.3407	36.2791	66.5094	39.0358
1986	10.8689	63.2334	36.3213	66.0064	33.1668
1987	10.8743	63.9602	37.3465	63.8505	33.1479
1988	10.8798	63.9878	36.7844	68.0515	37.8458
1989	10.8852	63.5918	36.5122	67.7587	35.9861
1990	10.8907	63.9635	36.9937	64.8092	32.8798
1991	10.8962	63.4908	36.4673	66.9977	34.1561
1992	10.9016	63.0893	36.4187	66.3627	33.7872
1993	10.9071	63.5127	37.0545	65.4048	33.3048
1994	10.9126	63.5502	36.9799	66.8292	34.3554
[truncated: 849 more rows]

## Sheet: Fig 4a
Data for Fig 4a
Vector plot of IPR for rolling h~ 2.5 μm, hybrid (h ~18 μm), and rotating (h ~40 μm) motions, showing distinct propulsion behaviors at f = 35 Hz
	Rolling	h ~ 2.5 μm	f = 35 Hz				Hybrid linear	h ~ 18 μm	f = 35 Hz				rotating	h ~ 40 μm	f = 35 Hz
	X (μm)	Y (μm)	Magnitude (μm)	β (rad)			X (μm)	Y (μm)	Magnitude (μm)	β (rad)			X (μm)	Y (μm)	Magnitude (μm)	β (rad)
	12.1528	67.7188	1	2.93067			59.4477	106.16	1	1.90393			73.0743	19.4113	1	2.59699
	12.1528	65.2952	1	2.92468			59.4207	106.118	1	1.99493			73.2042	19.578	1	1.4922
	12.1528	64.3316	1	2.88696			58.6362	105.254	1	1.86432			73.1099	19.4319	1	0.78949
	12.1528	62.604	1	2.89693			57.0335	103.9	1	1.49536			72.7847	19.9837	1	0.37036
	12.1528	61.1282	1	3.01187			55.6665	103.854	1	1.51057			72.6	20.0658	1	0.6578
	12.1528	59.927	1	2.8228			55.5913	102.427	1	1.63121			72.6431	19.8823	1	0.31093
	12.1528	57.8987	1	2.744			54.5544	100.746	1	2.10593			72.8604	19.8076	1	6.10083
	12.1528	56.0902	1	3.66504			53.7449	99.7699	1	2.09069			72.8393	19.6467	1	5.56482
	12.1528	54.8463	1	2.95604			53.0823	98.8768	1	2.4606			72.653	19.5372	1	4.84561
	12.1528	53.5037	1	2.69545			52.0496	98.067	1	3.04062			72.5993	19.7477	1	4.06889
	12.1528	51.1014	1	3.05201			51.1497	96.3604	1	2.85424			72.6138	19.8221	1	3.33989
	12.1528	49.8733	1	3.04787			50.1377	94.1162	1	2.00272			72.6743	19.8002	1	2.44938
	12.1528	48.0204	1	2.9372			50.1541	94.1596	1	2.88075			72.7527	19.8591	1	1.69661
	12.1528	46.2154	1	3.55118			50.2852	92.5504	1	2.79308			72.861	19.9742	1	1.04347
	12.1528	44.2677	1	3.49707			49.9393	91.0574	1	1.80487			73.0315	19.861	1	0.40631
	12.1528	41.9064	1	2.84084			49.0095	90.1016	1	1.9107			73.085	20.1373	1	0.0748
	12.1528	39.6699	1	3.06545			48.1349	89.0393	1	1.57021			73.1433	19.9846	1	6.23055
	12.1528	37.3682	1	2.84928			47.2452	88.2916	1	1.83851			73.1796	19.8665	1	5.68005
	12.1528	35.6731	1	3.23246			46.5775	87.0998	1	2.03441			72.9288	19.7531	1	4.78653
	12.1528	33.4053	1	2.73249			46.1595	86.1834	1	2.26214			72.9463	19.5923	1	4.35374
	12.1528	30.8388	1	2.81119			45.6343	84.7428	1	1.93656			72.6103	19.618	1	3.67973
	12.1528	28.0135	1	2.58825			44.6234	82.9312	1	1.77669			72.3079	19.4581	1	3.15625
	12.1528	26.6979	1	2.74893			44.4901	81.89	1	2.17736			72.1538	19.7148	1	2.40377
	12.1528	23.9254	1	2.51616			43.9519	80.3843	1	1.97707			72.4367	19.8035	1	1.37372
	12.1528	22.6164	1	3.18699			42.9098	79.4081	1	1.9171			72.9114	20.0168	1	0.77358
	12.1528	21.0413	1	2.97285			42.4559	78.0502	1	2.00482			73.1756	19.9543	1	0.48013
	12.1528	18.5002	1	2.72205			42.8337	77.8803	1	2.89347			73.2187	19.7497	1	6.26762
	12.1528	16.9796	1	3.04941			43.0571	76.35	1	3.07153			73.2697	19.5309	1	0.00602
	12.1528	15.114	1	3.2605			43.192	73.5722	1	2.11568			73.3848	19.426	1	6.05344
	12.1528	14.6095	1	2.91816			43.9013	72.7981	1	2.62046			73.0475	19.4563	1	5.287
							43.7292	71.6225	1	2.7792			74.0971	19.7374	1	5.42562
							43.4471	69.9386	1	2.60333			74.0197	19.7483	1	5.99686
							42.3726	67.9526	1	1.87727			74.4554	20.2416	1	0.10634
							41.8487	66.7264	1	2.04561			74.2539	20.3439	1	6.12248
							42.0863	66.2187	1	2.89562			74.011	20.2466	1	5.58224
							42.558	64.4117	1	2.83464			73.704	20.2278	1	4.32798
							42.471	62.2838	1	2.449			73.6294	20.1186	1	3.62001
							42.1916	61.7768	1	2.87607			73.4848	19.97	1	2.69715
							42.224	59.7084	1	2.13626			73.5409	20.0655	1	1.77218
							42.5008	58.2674	1	2.4704			73.5975	20.3886	1	0.96869
							42.6815	57.6667	1	3.01672			73.8233	20.6085	1	0.55927
							43.0438	55.7263	1	2.19453			73.3591	21.094	1	0.88515
							43.0741	55.1363	1	2.71214			73.357	20.9573	1	0.41001
							43.3705	52.8045	1	2.73409			73.5365	20.8132	1	0.14356
							43.1511	51.3066	1	1.82771			73.4744	20.766	1	6.06721
							43.1626	49.5518	1	1.96613			73.3341	20.6768	1	5.64312
							43.3238	49.2033	1	2.47358			73.1675	20.6105	1	4.89718
							43.4944	47.3033	1	2.07086			72.8072	20.6044	1	4.3132
							42.1078	45.4546	1	1.69001			72.7239	20.7484	1	3.56489
							41.7151	44.2634	1	1.95747			72.6693	20.8441	1	2.82969
							41.1824	42.4357	1	1.87492			72.7966	20.8642	1	1.95812
							39.6485	41.4752	1	2.25822			72.8353	21.119	1	1.47853
							39.2245	40.742	1	2.7818			73.0916	21.0496	1	0.73668
							38.8218	38.6354	1	2.63135			73.1943	21.0209	1	0.4192
							38.064	37.533	1	2.97912			73.1458	20.9042	1	0.03289
							37.8554	36.1707	1	2.90194			73.0952	20.8635	1	6.08039
							38.0896	34.7345	1	2.65213			72.8414	20.8951	1	5.71227
							38.1293	32.762	1	2.66242			72.6722	20.8054	1	5.05392
							38.1243	30.9442	1	2.94579			72.5212	20.8909	1	4.00128
							37.6347	29.9315	1	2.93451			72.6016	20.9988	1	3.77651
							38.3199	27.8972	1	3.01392			72.4369	21.181	1	3.11457
							38.3736	27.1336	1	3.11049			72.3974	21.3743	1	2.12224
							38.4865	25.4813	1	2.5473			72.6099	21.5739	1	1.3484
							38.3864	23.0376	1	1.86573			72.7969	21.7624	1	0.94809
							37.4952	21.3271	1	1.88244			72.9066	21.8306	1	0.42216
							37.4093	21.0571	1	2.24476			72.975	21.6197	1	6.24375
							37.7597	19.6079	1	2.15133			73.0682	21.5917	1	6.216
							36.918	19.8585	1	4.42223			72.9482	21.6286	1	5.83308
							38.7924	18.675	1	3.52194			72.7492	21.3557	1	5.39144
							37.9048	16.6726	1	0.7897			72.5899	21.2703	1	4.99408
							36.3929	17.8746	1	5.44106			72.3821	21.1723	1	4.31976
							37.0757	18.7729	1	5.33228			72.2455	21.0635	1	3.67357
							38.9552	19.2759	1	3.95578			72.3402	21.2276	1	3.07343
							39.8892	19.5808	1	4.29116			72.453	21.2973	1	2.5295
							40.4004	19.6241	1	4.53897			72.5796	21.1947	1	1.6634
							43.1771	18.5307	1	3.26076			72.6555	21.3545	1	1.26998
							44.0711	17.3067	1	3.24055			72.483	21.1571	1	0.78111
							44.8229	16.5437	1	3.37483			72.335	21.1066	1	0.33172
							45.2807	14.7822	1	2.76906			72.2529	21.0411	1	0.01494
							44.9941	12.2549	1	2.37888			72.1962	21.1454	1	6.16075
							45.0181	10.8504	1	2.37384			72.1124	21.2506	1	5.85487

## Sheet: Fig 4b
Data for Fig 4b
h ~ 2.5 μm	f = 35 Hz
Time (s)	β (rad)
0.0122	3.10511
0.0244	3.11843
0.0366	3.17133
0.0488	3.05966
0.061	3.11343
0.0732	3.05161
0.0854	3.1358
0.0976	3.11581
0.1098	3.15721
0.122	3.26239
0.1342	3.09912
0.1464	3.12208
0.1586	3.13025
0.1708	3.30366
0.183	3.33474
0.1952	3.11027
0.2074	3.12818
0.2196	3.13253
0.2318	3.12269
0.244	3.20407
0.2562	3.0614
0.2684	3.20902
0.2806	2.98899
0.2928	2.98964
0.305	3.09223
0.3172	3.09727
0.3294	3.16596
0.3416	3.01772
0.3538	3.03704
0.366	3.08221
0.3782	3.07137
0.3904	3.15503
0.4026	2.63691
0.4148	2.9411
0.427	3.20802
0.4392	3.15581
0.4514	3.11904
0.4636	3.00231
0.4758	3.05715
0.488	3.30547
0.5002	3.18631
0.5124	3.03486
0.5246	2.22444
0.5368	3.10827
0.549	2.7682
0.5612	3.16211
0.5734	3.11347
0.5856	3.21146
0.5978	3.02001
0.61	3.25546
0.6222	2.99724
0.6344	3.2231
0.6466	3.27267
0.6588	3.45745
0.671	3.23684
0.6832	3.47773
0.6954	3.2165
0.7076	3.22383
0.7198	3.20529
0.732	3.03833
0.7442	2.91845
0.7564	2.94803
0.7686	3.36913
0.7808	3.23026
0.793	3.4947
0.8052	2.92265
0.8174	3.0176
0.8296	3.27884
0.8418	2.82419
0.854	3.4118
0.8662	3.83949
0.8784	3.55559
0.8906	3.15975
0.9028	2.9041
0.915	3.4444
0.9272	2.93374
0.9394	2.78266
0.9516	2.9061
0.9638	3.16937
0.976	3.1063
0.9882	3.13048
1.0004	3.134
1.0126	3.04223
1.0248	3.19708
1.037	3.14888
1.0492	2.91813
1.0614	3.02054
1.0736	3.20851
1.0858	3.46534
1.098	3.13871
1.1102	2.8699
1.1224	3.29066
1.1346	3.27934
1.1468	3.27972
1.159	3.19537
1.1712	3.08208
1.1834	3.11648
1.1956	3.03591
1.2078	3.23962
1.22	3.05568
1.2322	3.22645
1.2444	3.09829
1.2566	3.30632
1.2688	2.93751
1.281	3.12409
1.2932	2.84291
1.3054	3.04163
1.3176	3.18716
1.3298	2.89814
1.342	3.07743
1.3542	3.22231
1.3664	3.3364
1.3786	2.85779
1.3908	2.26606
1.403	3.32326
1.4152	2.95541
1.4274	3.45688
1.4396	3.24119
1.4518	3.21383
1.464	2.97801
1.4762	3.11165
1.4884	3.10411
1.5006	2.85763
1.5128	3.15391
1.525	3.03354
1.5372	2.96931
1.5494	3.39776
1.5616	3.14339
1.5738	2.80257
1.586	3.5846
1.5982	3.72562
1.6104	2.72211
1.6226	3.43964
1.6348	2.9731
1.647	3.12736
1.6592	3.11347
1.6714	3.10821
1.6836	3.14408
1.6958	3.1055
1.708	3.03125
1.7202	3.67152
1.7324	3.13847
1.7446	3.1938
1.7568	3.30337
1.769	3.05266
1.7812	3.03728
1.7934	3.29499
1.8056	3.36959
1.8178	3.06833
1.83	2.95376
1.8422	3.01529
1.8544	3.17431
1.8666	3.22918
1.8788	3.14652
1.891	3.084
1.9032	3.43696
1.9154	2.96855
1.9276	3.43235
1.9398	3.15625
1.952	3.56984
1.9642	3.2399
1.9764	3.23336
1.9886	3.35686
2.0008	3.20356
2.013	3.10549
2.0252	2.99162
2.0374	3.20957
2.0496	3.05491
2.0618	3.00683
2.074	3.20371
2.0862	3.02372
2.0984	3.10899
2.1106	3.07549
2.1228	3.07686
2.135	3.07318
2.1472	3.17467
2.1594	3.25304
2.1716	2.81308
2.1838	3.04112
2.196	2.98544
2.2082	3.4069
2.2204	3.2613
2.2326	3.08312
2.2448	3.22982
2.257	2.88034
2.2692	3.16489
2.2814	3.05687
2.2936	3.27076
2.3058	3.10797
2.318	2.97811
2.3302	2.90693
2.3424	2.98152
2.3546	3.1462
2.3668	3.16901
2.379	3.04554
2.3912	3.11317
2.4034	2.73285
2.4156	3.04368
2.4278	2.96257
2.44	3.30429
2.4522	2.98563
2.4644	3.20133
2.4766	2.93773
2.4888	3.2525
2.501	3.13247
2.5132	3.14713
2.5254	2.7675
2.5376	2.86722
2.5498	3.16161
2.562	3.20564
2.5742	2.76269
2.5864	3.13345
2.5986	3.21696
2.6108	3.24336
2.623	3.20161
2.6352	3.29236
2.6474	3.16567
2.6596	3.04022
2.6718	2.7683
2.684	3.08628
2.6962	2.92337
2.7084	2.97801
2.7206	3.16241
2.7328	3.0572
2.745	3.2899
2.7572	2.69359
2.7694	3.21252
2.7816	3.22557
2.7938	2.92961
2.806	3.36149
2.8182	2.69061
2.8304	2.04894
2.8426	3.08889
2.8548	2.92721
2.867	2.95948
2.8792	3.18013
2.8914	2.8744
2.9036	3.05843
2.9158	2.949
2.928	3.04171
2.9402	3.36143
2.9524	3.17627
2.9646	3.06191
2.9768	3.0858
2.989	3.02719
3.0012	3.17993
3.0134	3.38038
3.0256	3.13711
3.0378	2.93336
3.05	3.45868
3.0622	3.14729
3.0744	3.32155
3.0866	3.23426
3.0988	3.52891
3.111	3.0891
3.1232	3.27439
3.1354	3.20613
3.1476	2.95734
3.1598	2.94836
3.172	2.98221
3.1842	2.8965
3.1964	2.8207
3.2086	3.03964
3.2208	3.05325
3.233	2.85846
3.2452	2.88561
3.2574	3.23082
3.2696	2.8409
3.2818	2.78033
3.294	3.13623
3.3062	3.22385
3.3184	3.10719
3.3306	2.84053
3.3428	2.8836
3.355	3.34459
3.3672	3.53765
3.3794	2.85935
3.3916	3.07438
3.4038	3.50967
3.416	3.00505
3.4282	3.43494
3.4404	2.90397
3.4526	3.06953
3.4648	2.80636
3.477	3.01149
3.4892	3.06442
3.5014	2.93352
3.5136	3.01308
3.5258	2.98418
3.538	3.21406
3.5502	3.09261
3.5624	3.08456
3.5746	3.06442
3.5868	3.10008
3.599	3.03106
3.6112	2.75274
3.6234	3.03589
3.6356	3.1764
3.6478	2.895
3.66	3.16767
3.6722	3.00551
3.6844	3.17884
3.6966	3.15884
3.7088	3.02916
3.721	2.97815
3.7332	3.13574
3.7454	3.05644
3.7576	2.6338
3.7698	2.91017
3.782	2.94228
3.7942	2.99767
3.8064	3.16767
3.8186	3.26655
3.8308	3.29647
3.843	3.15086
3.8552	3.06822
3.8674	3.01319
3.8796	2.9998
3.8918	3.20861
3.904	3.18047
3.9162	3.00249
3.9284	2.95949
3.9406	3.13403
3.9528	3.19757
3.965	3.13848
3.9772	3.14856
3.9894	3.2599
4.0016	3.10699

## Sheet: Fig 4c
Data for Fig 4c
h ~ 18 μm	f = 35 Hz
Time (s)	β (rad)
0	1.90393
0.00625	2.16562
0.0125	2.10526
0.01875	1.9773
0.025	1.87938
0.03125	2.05988
0.0375	2.13258
0.04375	2.07549
0.05	1.95764
0.05625	1.95996
0.0625	1.92684
0.06875	1.90773
0.075	1.83763
0.08125	2.01313
0.0875	1.88205
0.09375	2.07002
0.1	2.0141
0.10625	1.83514
0.1125	2.02804
0.11875	1.96607
0.125	1.87813
0.13125	1.97649
0.1375	1.81537
0.14375	1.85124
0.15	2.11466
0.15625	2.15974
0.1625	1.95038
0.16875	1.8101
0.175	1.94997
0.18125	1.95987
0.1875	1.83679
0.19375	2.32296
0.2	1.97286
0.20625	2.02686
0.2125	2.07939
0.21875	1.98474
0.225	1.9115
0.23125	2.30242
0.2375	2.02178
0.24375	1.9115
0.25	1.99493
0.25625	2.04755
0.2625	1.86836
0.26875	1.87921
0.275	2.30242
0.28125	1.99493
0.2875	2.22185
0.29375	2.07307
0.3	2.30137
0.30625	1.87292
0.3125	1.87292
0.31875	2.32284
0.325	2.08005
0.33125	1.84655
0.3375	1.97307
0.34375	2.07939
0.35	1.97789
0.35625	2.06728
0.3625	1.98823
0.36875	1.95523
0.375	1.81374
0.38125	1.81415
0.3875	1.72906
0.39375	1.87292
0.4	1.84827
0.40625	2.01209
0.4125	1.82272
0.41875	1.62559
0.425	1.70183
0.43125	1.74938
0.4375	1.69536
0.44375	1.63529
0.45	1.68149
0.45625	1.61814
0.4625	1.47141
0.46875	1.66357
0.475	1.70148
0.48125	1.91645
0.4875	1.67495
0.49375	1.78183
0.5	1.86432
0.50625	2.02016
0.5125	1.81839
0.51875	1.60438
0.525	2.1086
0.53125	1.84984
0.5375	1.93903
0.54375	1.74884
0.55	1.60417
0.55625	1.52207
0.5625	1.52929
0.56875	1.4354
0.575	1.47487
0.58125	1.59081
0.5875	1.39235
0.59375	1.54793
0.6	1.4709
0.60625	1.24387
0.6125	1.25748
0.61875	1.5925
0.625	1.68293
0.63125	1.38167
0.6375	1.49709
0.64375	1.76532
0.65	1.96669
0.65625	1.77619
0.6625	1.81968
0.66875	1.80845
0.675	1.99244
0.68125	1.7519
0.6875	1.67317
0.69375	1.75449
0.7	1.54041
0.70625	1.5643
0.7125	1.63978
0.71875	1.62366
0.725	1.65061
0.73125	1.47416
0.7375	1.65499
0.74375	1.36896
0.75	1.49536
0.75625	1.43254
0.7625	1.17249
0.76875	1.3018
0.775	1.22271
0.78125	1.26646
0.7875	1.38724
0.79375	1.50748
0.8	1.34451
0.80625	1.38007
0.8125	1.36852
0.81875	1.66913
0.825	1.60053
0.83125	1.5729
0.8375	1.62224
0.84375	1.54129
0.85	1.55164
0.85625	1.79484
0.8625	1.57201
0.86875	1.59752
0.875	1.6223
0.88125	1.53094
0.8875	1.444
0.89375	1.42403
0.9	1.25091
0.90625	1.47627
0.9125	1.20329
0.91875	1.3575
0.925	1.48448
0.93125	1.21977
0.9375	1.47766
0.94375	1.41122
0.95	1.20724
0.95625	1.47859
0.9625	1.48547
0.96875	1.52532
0.975	1.5173
0.98125	1.54276
0.9875	1.55348
0.99375	1.52427
1	1.51057
1.00625	1.65717
1.0125	1.53624
1.01875	1.66116
1.025	1.73071
1.03125	1.56149
1.0375	1.82467
1.04375	1.87798
1.05	1.84042
1.05625	1.91694
1.0625	1.68856
1.06875	1.68976
1.075	1.83471
1.08125	1.8566
1.0875	1.95813
1.09375	1.73085
1.1	2.03536
1.10625	1.84081
1.1125	1.77821
1.11875	1.88406
1.125	1.56907
1.13125	1.7862
1.1375	1.96956
1.14375	1.74976
1.15	1.83284
1.15625	1.85265
1.1625	1.96372
1.16875	1.82781
1.175	2.05509
1.18125	1.94362
1.1875	2.14369
1.19375	2.29052
1.2	2.13985
1.20625	1.86341
1.2125	1.81424
1.21875	1.96171
1.225	1.98402
1.23125	2.09037
1.2375	1.77169
1.24375	1.78674
1.25	1.63121
1.25625	1.65043
1.2625	1.77207
1.26875	1.80089
1.275	1.76347
1.28125	1.83519
1.2875	1.8343
1.29375	1.96244
1.3	1.79821
1.30625	1.93676
1.3125	1.9334
1.31875	1.82802
1.325	1.75097
1.33125	1.75002
1.3375	1.7842
1.34375	1.80469
1.35	1.95883
1.35625	1.75355
1.3625	1.58384
1.36875	1.77784
1.375	1.62474
1.38125	1.7749
1.3875	1.66134
1.39375	1.85287
1.4	1.87257
1.40625	1.9166
1.4125	1.94202
1.41875	1.99404
1.425	2.10279
1.43125	2.24232
1.4375	2.08097
1.44375	2.02023
1.45	2.23431
1.45625	2.34805
1.4625	2.45404
1.46875	2.27349
1.475	2.0152
1.48125	2.11383
1.4875	2.00748
1.49375	2.04826
1.5	2.10593
1.50625	2.01502
1.5125	1.72491
1.51875	1.99904
1.525	1.97435
1.53125	1.87449
1.5375	1.70439
1.54375	1.51919
1.55	1.83603
1.55625	1.78375
1.5625	1.73559
1.56875	1.97369
1.575	1.85765
1.58125	1.74327
1.5875	1.82118
1.59375	1.91568
1.6	2.14852
1.60625	2.12536
1.6125	2.04943
1.61875	2.32063
1.625	2.26019
1.63125	2.05666
1.6375	1.98434
1.64375	1.77641
1.65	1.99624
1.65625	1.93492
1.6625	2.00561
1.66875	1.81258
1.675	1.8428
1.68125	0.98631
1.6875	1.50414
1.69375	1.2177
1.7	1.42775
1.70625	1.60956
1.7125	2.0751
1.71875	1.46806
1.725	2.09255
1.73125	1.61313
1.7375	2.21305
1.74375	1.83133
1.75	2.09069
1.75625	2.25124
1.7625	2.26323
1.76875	2.1521
1.775	2.1939
1.78125	1.71713
1.7875	1.79477
1.79375	1.97403
1.8	1.67928
1.80625	1.69415
1.8125	1.89013
1.81875	1.987
1.825	1.26614
1.83125	1.96429
1.8375	1.47697
1.84375	1.35582
1.85	1.71953
1.85625	1.81141
1.8625	1.92352
1.86875	2.17661
1.875	1.79761
1.88125	2.12756
1.8875	2.0934
1.89375	2.25315
1.9	2.14815
1.90625	2.52294
1.9125	2.20973
1.91875	2.36123
1.925	2.52098
1.93125	2.44939
1.9375	2.40524
1.94375	2.18945
1.95	2.66848
1.95625	2.07544
1.9625	2.25604
1.96875	2.06896
1.975	2.38923
1.98125	2.41492
1.9875	1.80354
1.99375	1.98741
2	2.4606
2.00625	2.32038
2.0125	1.78415
2.01875	2.24205
2.025	1.88142
2.03125	1.85591
2.0375	2.10426
2.04375	1.81194
2.05	2.24987
2.05625	2.72124
2.0625	2.16979
2.06875	2.35978
2.075	2.17776
2.08125	2.99665
2.0875	2.89254
2.09375	2.72573
2.1	2.67734
2.10625	2.67455
2.1125	2.5009
2.11875	2.70722
2.125	2.62912
2.13125	2.58671
2.1375	1.9864
2.14375	2.06096
2.15	2.08621
2.15625	2.49385
2.1625	2.26147
2.16875	2.64499
2.175	2.69832
2.18125	2.77532
2.1875	2.72902
2.19375	2.64654
2.2	2.9101
2.20625	2.83752
2.2125	3.00775
2.21875	2.93726
2.225	2.95735
2.23125	2.98427
2.2375	3.00269
2.24375	2.88775
2.25	3.04062
2.25625	3.04743
2.2625	3.03348
2.26875	3.0387
2.275	3.07179
2.28125	2.98321
2.2875	2.95695
2.29375	2.97965
2.3	3.02451
2.30625	2.99713
2.3125	2.79755
2.31875	2.7794
2.325	2.93537
2.33125	2.68886
2.3375	2.72801
2.34375	2.66143
2.35	2.84371
2.35625	2.66232
2.3625	2.44079
2.36875	2.46003
2.375	2.42721
2.38125	2.69063
2.3875	2.27727
2.39375	2.6477
2.4	2.71559
2.40625	2.7163
2.4125	2.7239
2.41875	2.66328
2.425	2.91875
2.43125	2.99084
2.4375	2.85633
2.44375	2.97128
2.45	3.05352
2.45625	3.04388
2.4625	3.08585
2.46875	2.8758
2.475	3.05589
2.48125	3.07941
2.4875	3.19592
2.49375	3.16671
2.5	2.85424
2.50625	2.66237
2.5125	3.09637
2.51875	3.01907
2.525	2.72921
2.53125	2.5176
2.5375	2.69366
2.54375	2.62181
2.55	2.50353
2.55625	1.9447
2.5625	2.00186
2.56875	2.25054
2.575	2.07663
2.58125	1.94113
2.5875	1.90272
2.59375	1.95722
2.6	1.91067
2.60625	2.0655
2.6125	2.19315
2.61875	2.48943
2.625	2.45724
2.63125	2.18337
2.6375	2.40587
2.64375	2.40645
2.65	2.40056
2.65625	2.05239
2.6625	2.33879
2.66875	2.03447
2.675	1.95302
2.68125	2.22004
2.6875	2.04103
2.69375	2.27521
2.7	1.97472
2.70625	2.02047
2.7125	1.71471
2.71875	1.90988
2.725	1.72683
2.73125	1.94192
2.7375	1.96027
2.74375	2.01468
2.75	2.00272
2.75625	2.00943
2.7625	2.0488
2.76875	2.25682
2.775	2.55395
2.78125	2.35829
2.7875	2.09872
2.79375	2.11578
2.8	2.64692
2.80625	2.6179
2.8125	2.72138
2.81875	2.94499
2.825	2.74831
2.83125	2.73452
2.8375	2.80253
2.84375	2.6419
2.85	2.47895
2.85625	2.6042
2.8625	2.74253
2.86875	2.58363
2.875	2.35403
2.88125	2.355
2.8875	2.38423
2.89375	2.36805
2.9	2.03748
2.90625	2.12553
2.9125	2.47237
2.91875	2.41466
2.925	2.20287
2.93125	2.6303
2.9375	2.61882
2.94375	2.47096
2.95	2.47416
2.95625	2.49772
2.9625	2.60525
2.96875	2.65631
2.975	2.72704
2.98125	2.63221
2.9875	2.89925
2.99375	2.83669
3	2.88075
3.00625	2.83414
3.0125	2.89977
3.01875	2.80402
3.025	2.78904
3.03125	2.66196
3.0375	2.46397
3.04375	2.82968
3.05	2.52271
3.05625	2.82711
3.0625	2.58168
3.06875	2.57869
3.075	2.42001
3.08125	2.1882
3.0875	2.24106
3.09375	2.28855
3.1	2.14493
3.10625	1.91067
3.1125	2.14612
3.11875	2.5512
3.125	2.4606
3.13125	2.29136
3.1375	2.28221
3.14375	2.48503
3.15	2.54111
3.15625	2.71435
3.1625	2.61714
3.16875	2.74783
3.175	2.84787
3.18125	2.95056
3.1875	3.02944
3.19375	3.07151
3.2	3.08681
3.20625	3.16097
3.2125	3.22407
3.21875	2.83594
3.225	2.73756
3.23125	2.94337
3.2375	3.08555
3.24375	2.78538
3.25	2.79308
3.25625	2.58684
3.2625	2.64318
3.26875	2.66437
3.275	2.79812
3.28125	2.2918
3.2875	2.34372
3.29375	2.36737
3.3	2.135
3.30625	2.24056
3.3125	1.98442
3.31875	2.44406
3.325	2.45375
3.33125	2.55493
3.3375	2.58551
3.34375	2.44225
3.35	2.27222
3.35625	2.55804
3.3625	2.92532
3.36875	2.93451
3.375	2.7577
3.38125	2.76214
3.3875	2.42725
3.39375	2.39014
3.4	2.50505
3.40625	2.17881
3.4125	2.39368
3.41875	2.37046
3.425	2.65203
3.43125	2.5677
3.4375	2.1852
3.44375	2.27482
3.45	2.13667
3.45625	2.00418
3.4625	1.92166
3.46875	2.0714
3.475	1.69371
3.48125	1.90655
3.4875	1.61155
3.49375	1.82895
3.5	1.80487
3.50625	1.80778
3.5125	1.62573
3.51875	1.4434
3.525	1.26151
3.53125	1.61356
3.5375	1.51037
3.54375	1.58848
3.55	1.65752
3.55625	1.63948
3.5625	1.687
3.56875	1.67071
3.575	1.98668
3.58125	1.94771
3.5875	1.94163
3.59375	1.86028
3.6	1.8666
3.60625	1.97737
3.6125	1.81256
3.61875	1.72959
3.625	2.07787
3.63125	1.73574
3.6375	2.02682
3.64375	2.04411
3.65	1.72212
3.65625	1.6844
3.6625	1.43275
3.66875	1.44325
3.675	1.42375
3.68125	1.46753
3.6875	1.6746
3.69375	1.91064
3.7	1.53704
3.70625	1.56834
3.7125	1.89834
3.71875	1.94113
3.725	1.80262
3.73125	2.16155
3.7375	1.79465
3.74375	1.85299
3.75	1.9107
3.75625	1.93739
3.7625	1.87686
3.76875	1.65167
3.775	1.83033
3.78125	1.83677
3.7875	1.65931
3.79375	1.63927
3.8	1.83223
3.80625	1.75573
3.8125	1.66379
3.81875	1.6653
3.825	1.56823
3.83125	1.56238
3.8375	1.47886
3.84375	1.35742
3.85	1.50693
3.85625	1.75289
3.8625	1.85965
3.86875	1.55298
3.875	1.82444
3.88125	1.79319
3.8875	1.71531
3.89375	1.97723
3.9	1.96284
3.90625	1.84203
3.9125	2.05907
3.91875	1.90832
3.925	2.03651
3.93125	2.06433
3.9375	2.55221
3.94375	2.14669
3.95	2.20287
3.95625	2.16339
3.9625	2.04357
3.96875	2.00193
3.975	2.02572
3.98125	1.86104
3.9875	1.74886
3.99375	1.77207
4	1.57021
4.00625	1.68806
4.0125	1.64815
4.01875	1.48328
4.025	1.39192
4.03125	1.22806
4.0375	1.41321
4.04375	1.24249
4.05	1.47217
4.05625	1.56117
4.0625	1.63265
4.06875	1.65497
4.075	1.61982
4.08125	1.98615
4.0875	2.06186
4.09375	2.14393
4.1	1.86992
4.10625	1.98169
4.1125	2.05053
4.11875	2.1147
4.125	1.67221
4.13125	1.65694
4.1375	1.8525
4.14375	1.69941
4.15	1.62266
4.15625	1.67235
4.1625	1.49991
4.16875	1.31699
4.175	1.54167
4.18125	1.46851
4.1875	1.46114
4.19375	1.86097
4.2	1.59005
4.20625	1.46485
4.2125	1.5003
4.21875	1.88442
4.225	1.75294
4.23125	1.93711
4.2375	1.95074
4.24375	1.9745
4.25	1.83851
4.25625	1.96096
4.2625	2.00827
4.26875	2.01576
4.275	2.45368
4.28125	2.06957
4.2875	2.06784
4.29375	2.17479
4.3	2.0364
4.30625	1.80513
4.3125	1.94975
4.31875	1.62797
4.325	2.07675
4.33125	1.78623
4.3375	1.80214
4.34375	1.83065
4.35	1.59589
4.35625	1.60111
4.3625	1.95534
4.36875	1.98167
4.375	1.67089
4.38125	1.85289
4.3875	1.90907
4.39375	1.95043
4.4	1.99015
4.40625	1.9472
4.4125	2.21316
4.41875	2.15917
4.425	2.48679
4.43125	2.31292
4.4375	2.02971
4.44375	2.15994
4.45	1.8837
4.45625	2.1089
4.4625	1.89819
4.46875	2.11326
4.475	2.11045
4.48125	1.75433
4.4875	1.9672
4.49375	1.7941
4.5	2.03441
4.50625	2.04837
4.5125	2.08946
4.51875	1.89372
4.525	2.03651
4.53125	2.16153
4.5375	2.3168
4.54375	2.42949
4.55	2.73257
4.55625	2.58116
4.5625	2.38449
4.56875	2.59969
4.575	2.7643
4.58125	2.87218
4.5875	2.8208
4.59375	2.84838
4.6	2.55348
4.60625	2.39249
4.6125	2.49962
4.61875	2.66393
4.625	2.28848
4.63125	2.31086
4.6375	2.5006
4.64375	2.32012
4.65	2.06783
4.65625	2.27338
4.6625	2.36403
4.66875	2.20176
4.675	2.06957
4.68125	2.0297
4.6875	2.0132
4.69375	1.97598
4.7	1.85207
4.70625	2.25434
4.7125	2.17739
4.71875	2.18841
4.725	2.29392
4.73125	2.31376
4.7375	2.13819
4.74375	2.22074
4.75	2.26214
4.75625	2.65117
4.7625	2.52887
4.76875	2.68711
4.775	2.64412
4.78125	2.29112
4.7875	2.08077
4.79375	2.03794
4.8	2.27572
4.80625	2.46753
4.8125	2.10256
4.81875	2.18132
4.825	2.22102
4.83125	2.11127
4.8375	2.03613
4.84375	1.97623
4.85	2.0785
4.85625	1.81388
4.8625	2.07811
4.86875	1.82278
4.875	1.80884
4.88125	1.58564
4.8875	1.63465
4.89375	1.62266
4.9	1.7416
4.90625	1.7972
4.9125	2.00124
4.91875	1.75209
4.925	2.00893
4.93125	1.71183
4.9375	1.9698
4.94375	2.04514
4.95	1.93499
4.95625	2.24096
4.9625	2.06957
4.96875	2.66169
4.975	2.50514
4.98125	2.00265
4.9875	2.16287
4.99375	2.09236
5	1.93656
5.00625	1.8309
5.0125	2.03607
5.01875	2.07576
5.025	2.24407
5.03125	2.20401
5.0375	2.26478
5.04375	2.34593
5.05	2.32289
5.05625	2.40039
5.0625	2.36815
5.06875	2.17001
5.075	1.94163
5.08125	1.97308
5.0875	2.06575
5.09375	1.90688
5.1	1.8529
5.10625	1.90069
5.1125	2.06156
5.11875	2.03598
5.125	1.93785
5.13125	1.70376
5.1375	1.94621
5.14375	2.05352
5.15	2.00988
5.15625	2.0558
5.1625	2.14553
5.16875	2.16287
5.175	2.26591
5.18125	2.26031
5.1875	2.163
5.19375	2.36506
5.2	2.39
5.20625	2.29199
5.2125	1.90462
5.21875	1.88253
5.225	2.08412
5.23125	1.72949
5.2375	1.83958
5.24375	1.92558
5.25	1.77669
5.25625	2.22093
5.2625	2.12575
5.26875	2.19607
5.275	2.03651
5.28125	2.10526
5.2875	2.30125
5.29375	2.66169
5.3	2.12923
5.30625	2.20053
5.3125	2.3153
5.31875	2.47583
5.325	2.65586
5.33125	2.92628
5.3375	2.85083
5.34375	2.87713
5.35	2.78951
5.35625	2.41141
5.3625	2.54321
5.36875	2.60458
5.375	2.21759
5.38125	2.44736
5.3875	2.48031
5.39375	2.30018
5.4	2.02971
5.40625	1.91936
5.4125	2.16964
5.41875	2.20872
5.425	2.1408
5.43125	2.33905
5.4375	2.48191
5.44375	2.31495
5.45	2.58334
5.45625	2.48053
5.4625	2.7198
5.46875	2.45552
5.475	2.58222
5.48125	2.37209
5.4875	2.12923
5.49375	2.38756
5.5	2.17736
5.50625	2.19917
5.5125	2.11679
5.51875	2.19409
5.525	2.04381
5.53125	2.05482
5.5375	2.05927
5.54375	2.09343
5.55	2.02571
5.55625	2.08958
5.5625	2.15346
5.56875	2.41449
5.575	2.25976
5.58125	2.31531
5.5875	2.49067
5.59375	2.3567
5.6	2.58717
5.60625	2.63225
5.6125	2.17814
5.61875	2.28404
5.625	2.24791
5.63125	2.16996
5.6375	2.21637
5.64375	2.08376
5.65	2.19889
5.65625	1.85586
5.6625	1.73033
5.66875	1.96489
5.675	1.63818
5.68125	1.76356
5.6875	2.12336
5.69375	2.24941
5.7	2.04355
5.70625	2.05308
5.7125	2.31376
5.71875	2.07607
5.725	2.25764
5.73125	1.98697
5.7375	2.06409
5.74375	1.97694
5.75	1.97707
5.75625	1.8183
5.7625	1.96773
5.76875	1.96494
5.775	1.5417
5.78125	1.54646
5.7875	1.63663
5.79375	1.68548
5.8	1.72495
5.80625	2.00987
5.8125	1.8718
5.81875	1.95097
5.825	1.82468
5.83125	2.03873
5.8375	2.16806
5.84375	2.34243
5.85	2.52345
5.85625	2.41838
5.8625	2.08289
5.86875	2.47344
5.875	2.37066
5.88125	2.05702
5.8875	2.01215
5.89375	1.89831
5.9	1.92627
5.90625	1.90261
5.9125	1.72695
5.91875	1.80528
5.925	1.71987
5.93125	1.60081
5.9375	1.72429
5.94375	1.4896
5.95	1.37585
5.95625	1.27828
5.9625	1.57973
5.96875	1.51348
5.975	1.79039
5.98125	1.76918
5.9875	1.6687
5.99375	1.62593
6	1.9171
6.00625	2.18918
6.0125	2.05655
6.01875	1.92348
6.025	1.75857
6.03125	2.13181
6.0375	2.19968
6.04375	2.25129
6.05	2.40543
6.05625	2.20686
6.0625	2.42204
6.06875	2.37377
6.075	2.56918
6.08125	2.10311
6.0875	2.24575
6.09375	2.1142
6.1	2.14304
6.10625	2.13747
6.1125	2.10016
6.11875	2.56609
6.125	2.49913
6.13125	2.30323
6.1375	2.40179
6.14375	2.46431
6.15	2.44581
6.15625	2.56245
6.1625	2.62474
6.16875	2.56906
6.175	2.75174
6.18125	2.41912
6.1875	2.73095
6.19375	2.62854
6.2	2.26023
6.20625	2.36205
6.2125	2.34328
6.21875	2.52976
6.225	2.43055
6.23125	2.17288
6.2375	2.46456
6.24375	2.34019
6.25	2.00482
6.25625	2.32823
6.2625	2.59302
6.26875	2.39308
6.275	2.38036
6.28125	2.16464
6.2875	2.57956
6.29375	2.65543
6.3	2.57027
6.30625	2.70991
6.3125	2.55546
6.31875	2.64507
6.325	2.6526
6.33125	2.86811
6.3375	2.8716
6.34375	2.9889
6.35	2.96877
6.35625	2.8493
6.3625	2.9033
6.36875	2.85433
6.375	2.53019
6.38125	2.33691
6.3875	2.50947
6.39375	2.47705
6.4	2.49672
6.40625	2.86344
6.4125	2.74862
6.41875	2.7522
6.425	2.816
6.43125	2.9802
6.4375	2.95023
6.44375	3.02336
6.45	3.03125
6.45625	2.99103
6.4625	3.00051
6.46875	3.10258
6.475	3.06437
6.48125	2.92833
6.4875	2.87877
6.49375	3.01127
6.5	2.89347
6.50625	3.05905
6.5125	3.02987
6.51875	2.66657
6.525	2.92863
6.53125	2.9196
6.5375	2.77277
6.54375	2.65133
6.55	2.79492
6.55625	2.75699
6.5625	2.81537
6.56875	2.8688
6.575	2.84167
6.58125	2.84993
6.5875	3.02186
6.59375	3.09016
6.6	3.01694
6.60625	3.00116
6.6125	3.07504
6.61875	2.93235
6.625	2.95203
6.63125	3.01693
6.6375	2.91363
6.64375	2.99242
6.65	2.95096
6.65625	2.92452
6.6625	2.68694
6.66875	2.50281
6.675	2.8124
6.68125	1.86319
6.6875	2.91002
6.69375	1.79632
6.7	1.89589
6.70625	2.92198
6.7125	2.41123
6.71875	2.98401
6.725	1.79032
6.73125	2.72044
6.7375	2.96108
6.74375	3.05884
6.75	3.07153
6.75625	1.87267
6.7625	3.21168
6.76875	3.40839
6.775	3.10404
6.78125	3.33607
6.7875	3.47255
6.79375	2.44087
6.8	1.96421
6.80625	2.7799
6.8125	1.7474
6.81875	2.30855
6.825	1.90725
6.83125	2.10147
6.8375	2.03176
6.84375	2.07881
6.85	1.88717
6.85625	2.30443
6.8625	2.01201
6.86875	2.10051
6.875	2.36649
6.88125	2.07693
6.8875	2.3437
6.89375	2.28445
6.9	2.34617
6.90625	2.14987
6.9125	1.92018
6.91875	2.06918
6.925	1.99907
6.93125	2.05534
6.9375	1.92919
6.94375	1.96353
6.95	1.94559
6.95625	1.7641
6.9625	1.71983
6.96875	2.16055
6.975	1.79433
6.98125	2.04967
6.9875	1.90706
6.99375	1.85444
7	2.11568
7.00625	2.34667
7.0125	2.31152
7.01875	2.34968
7.025	2.2138
7.03125	2.16099
7.0375	2.16319
7.04375	2.38847
7.05	2.64694
7.05625	2.66701
7.0625	2.34223
7.06875	2.58198
7.075	2.41791
7.08125	2.33033
7.0875	2.39729
7.09375	2.43796
7.1	2.9655
7.10625	2.85739
7.1125	2.69135
7.11875	2.72293
7.125	2.83478
7.13125	3.02835
7.1375	2.84068
7.14375	2.9965
7.15	3.21063
7.15625	2.6342
7.1625	3.23943
7.16875	3.45155
7.175	3.23099
7.18125	3.18239
7.1875	3.15905
7.19375	3.10532
7.2	2.74312
7.20625	3.07478
7.2125	3.21566
7.21875	3.19159
7.225	2.91227
7.23125	3.02939
7.2375	2.5082
7.24375	2.5799
7.25	2.62046
7.25625	2.41041
7.2625	2.57005
7.26875	2.54763
7.275	2.14337
7.28125	2.26894
7.2875	1.91081
7.29375	2.48005
7.3	2.8478
7.30625	2.72023
7.3125	2.48219
7.31875	2.5877
7.325	2.79237
7.33125	3.09853
7.3375	2.686
7.34375	3.14359
7.35	3.00137
7.35625	3.02431
7.3625	2.70182
7.36875	2.8835
7.375	2.88573
7.38125	2.73892
7.3875	2.89057
7.39375	2.77518
7.4	2.52048
7.40625	2.5338
7.4125	2.30326
7.41875	2.41499
7.425	2.54987
7.43125	2.33288
7.4375	2.30033
7.44375	2.54875
7.45	2.64347
7.45625	2.74249
7.4625	2.82581
7.46875	2.78555
7.475	2.49942
7.48125	2.568
7.4875	3.04007
7.49375	3.05303
7.5	2.7792
7.50625	2.67648
7.5125	2.81707
7.51875	2.60151
7.525	2.56478
7.53125	2.43137
7.5375	2.64759
7.54375	2.66579
7.55	2.61643
7.55625	2.32326
7.5625	2.66879
7.56875	2.65316
7.575	2.56229
7.58125	2.54142
7.5875	2.30211
7.59375	2.47265
7.6	2.50746
7.60625	2.34288
7.6125	2.5726
7.61875	2.75685
7.625	2.52384
7.63125	2.73737
7.6375	2.6516
7.64375	2.65968
7.65	2.71995
7.65625	2.73478
7.6625	2.67533
7.66875	2.77477
7.675	2.82152
7.68125	2.91094
7.6875	2.68503
7.69375	2.73095
7.7	2.81661
7.70625	2.78002
7.7125	2.63203
7.71875	2.64783
7.725	2.41096
7.73125	2.46369
7.7375	2.3049
7.74375	2.29887
7.75	2.60333
7.75625	2.62984
7.7625	2.89557
7.76875	2.70601
7.775	2.67894
7.78125	2.80908
7.7875	2.81299
7.79375	2.8375
7.8	2.94219
7.80625	2.97949
7.8125	2.9553
7.81875	3.01729
7.825	2.94485
7.83125	2.84101
7.8375	2.81442
7.84375	2.73247
7.85	2.8099
7.85625	2.717
7.8625	2.74307
7.86875	2.71945
7.875	2.86604
7.88125	2.88158
7.8875	2.94726
7.89375	2.94418
7.9	2.85546
7.90625	2.94984
7.9125	2.64114
7.91875	2.90392
7.925	2.95243
7.93125	2.94982
7.9375	2.96402
7.94375	2.5947
7.95	2.19071
7.95625	2.71752
7.9625	2.82171
7.96875	2.9057
7.975	1.93867
7.98125	1.92078
7.9875	2.56925
7.99375	1.93474
8	1.87727
8.00625	2.01008
8.0125	1.83485
8.01875	2.01734
8.025	1.6548
8.03125	1.66695
8.0375	1.55685
8.04375	1.96853
8.05	1.98458
8.05625	1.75681
8.0625	2.08865
8.06875	2.06543
8.075	2.04248
8.08125	2.05947
8.0875	2.15389
8.09375	2.28296
8.1	2.53107
8.10625	2.63149
8.1125	2.37855
8.11875	2.289
8.125	2.37694
8.13125	2.22037
8.1375	2.35703
8.14375	2.15377
8.15	1.87554
8.15625	1.98133
8.1625	2.14305
8.16875	1.94218
8.175	1.61004
8.18125	1.65841
8.1875	1.66077
8.19375	1.58932
8.2	1.66049
8.20625	1.66785
8.2125	1.54516
8.21875	1.69396
8.225	1.74906
8.23125	1.78927
8.2375	1.80514
8.24375	2.07979
8.25	2.04561
8.25625	2.07358
8.2625	1.9975
8.26875	2.0488
8.275	2.1651
8.28125	2.35153
8.2875	2.50903
8.29375	2.28507
8.3	2.36541
8.30625	2.51385
8.3125	2.59505
8.31875	2.08531
8.325	2.14947
8.33125	2.45047
8.3375	2.20706
8.34375	2.21254
8.35	2.16876
8.35625	2.10724
8.3625	2.17645
8.36875	2.28004
8.375	2.65202
8.38125	2.48862
8.3875	2.20627
8.39375	2.41126
8.4	2.45636
8.40625	2.61463
8.4125	2.57002
8.41875	2.66068
8.425	2.42851
8.43125	2.53955
8.4375	2.82455
8.44375	2.96778
8.45	2.62669
8.45625	2.77569
8.4625	2.67044
8.46875	2.55353
8.475	2.72926
8.48125	2.68146
8.4875	2.9091
8.49375	2.75999
8.5	2.89562
8.50625	2.70659
8.5125	2.67962
8.51875	3.19922
8.525	3.17172
8.53125	2.91158
8.5375	3.3645
8.54375	3.22486
8.55	2.83437
8.55625	2.78011
8.5625	2.98868
8.56875	2.68657
8.575	2.70978
8.58125	2.90466
8.5875	2.5049
8.59375	2.63932
8.6	2.68397
8.60625	2.68882
8.6125	2.5972
8.61875	2.41984
8.625	2.5776
8.63125	2.28722
8.6375	2.28787
8.64375	2.43031
8.65	2.27253
8.65625	2.49123
8.6625	2.4975
8.66875	2.55494
8.675	2.31808
8.68125	2.59721
8.6875	2.78563
8.69375	2.81324
8.7	2.79922
8.70625	2.63729
8.7125	2.6308
8.71875	2.77853
8.725	2.86465
8.73125	3.04312
8.7375	2.93174
8.74375	2.93246
8.75	2.83464
8.75625	2.80422
8.7625	2.73146
8.76875	2.68036
8.775	2.79922
8.78125	2.64867
8.7875	2.58132
8.79375	2.52211
8.8	2.66026
8.80625	2.08289
8.8125	2.37607
8.81875	2.33845
8.825	2.61422
8.83125	2.3047
8.8375	2.23246
8.84375	2.16973
8.85	2.34543
8.85625	2.29056
8.8625	2.57646
8.86875	2.61899
8.875	2.68919
8.88125	2.94193
8.8875	2.66485
8.89375	3.03223
8.9	2.62863
8.90625	2.93923
8.9125	3.04867
8.91875	3.05179
8.925	2.60331
8.93125	3.01304
8.9375	2.7205
8.94375	2.7638
8.95	2.5788
8.95625	2.45957
8.9625	2.67346
8.96875	2.53673
8.975	2.5063
8.98125	2.36731
8.9875	2.38408
8.99375	2.64958
9	2.449
9.00625	2.75623
9.0125	2.76368
9.01875	2.62667
9.025	2.60103
9.03125	2.9049
9.0375	2.87713
9.04375	2.6882
9.05	2.74275
9.05625	2.6226
9.0625	2.90122
9.06875	3.02086
9.075	2.93166
9.08125	3.07476
9.0875	3.12326
9.09375	2.94243
9.1	2.88952
9.10625	2.7113
9.1125	2.81235
9.11875	2.8625
9.125	2.78917
9.13125	2.67044
9.1375	2.74471
9.14375	2.62531
9.15	2.31726
9.15625	2.4367
9.1625	2.24778
9.16875	2.58049
9.175	2.36981
9.18125	2.2345
9.1875	2.49438
9.19375	1.98508
9.2	2.50279
9.20625	2.4957
9.2125	2.49684
9.21875	2.46772
9.225	2.50428
9.23125	2.73627
9.2375	2.72698
9.24375	2.71223
9.25	2.87607
9.25625	2.83172
9.2625	2.90467
9.26875	2.49684
9.275	2.48141
9.28125	2.62357
9.2875	2.57575
9.29375	2.52565
9.3	2.52159
9.30625	2.12231
9.3125	2.28817
9.31875	2.32515
9.325	2.40528
9.33125	2.29744
9.3375	2.36793
9.34375	2.37229
9.35	2.30167
9.35625	2.49684
9.3625	2.37797
9.36875	2.67003
9.375	2.4814
9.38125	2.68795
9.3875	2.77544
9.39375	2.76684
9.4	2.78562
9.40625	2.92247
9.4125	3.00761
9.41875	2.99009
9.425	3.01709
9.43125	3.05081
9.4375	2.78951
9.44375	2.73387
9.45	2.51193
9.45625	2.64345
9.4625	2.68075
9.46875	2.62205
9.475	2.69783
9.48125	2.81455
9.4875	2.33689
9.49375	2.45656
9.5	2.13626
9.50625	2.51543
9.5125	2.48664
9.51875	2.47709
9.525	2.6606
9.53125	2.57503
9.5375	2.93779
9.54375	2.83958
9.55	2.92376
9.55625	3.0238
9.5625	2.9815
9.56875	3.08198
9.575	2.96146
9.58125	2.6284
9.5875	2.70053
9.59375	2.96779
9.6	2.97379
9.60625	2.65757
9.6125	2.67802
9.61875	2.63345
9.625	2.76221
9.63125	2.60368
9.6375	2.57359
9.64375	2.39246
9.65	2.72506
9.65625	2.83264
9.6625	2.67747
9.66875	2.72741
9.675	2.7777
9.68125	2.8637
9.6875	2.77187
9.69375	2.591
9.7	2.66081
9.70625	2.70305
9.7125	2.77489
9.71875	2.61978
9.725	2.3838
9.73125	2.71158
9.7375	2.54633
9.74375	2.57135
9.75	2.4704
9.75625	2.64217
9.7625	2.47041
9.76875	2.73896
9.775	2.52699
9.78125	2.7514
9.7875	2.5908
9.79375	2.8316
9.8	2.84971
9.80625	2.78376
9.8125	2.90494
9.81875	2.79118
9.825	2.95906
9.83125	2.93897
9.8375	3.07542
9.84375	3.14377
9.85	3.24468
9.85625	3.15893
9.8625	3.15713
9.86875	3.01805
9.875	2.92104
9.88125	2.83825
9.8875	2.79498
9.89375	2.81041
9.9	2.96745
9.90625	2.73939
9.9125	2.75605
9.91875	2.91999
9.925	3.08198
9.93125	2.9964
9.9375	2.95179
9.94375	3.08604
9.95	2.92043
9.95625	3.21269
9.9625	3.09019
9.96875	3.18212
9.975	3.20889
9.98125	2.96918
9.9875	3.02902
9.99375	2.90812
10	3.01672
10.0062	3.05583
10.0125	2.67387
10.0188	2.78861
10.025	2.86559
10.0312	2.79747
10.0375	2.76837
10.0437	2.37289
10.05	2.59844
10.0563	2.83371
10.0625	2.84206
10.0687	2.71939
10.075	2.8911
10.0813	2.81816
10.0875	2.95652
10.0938	2.8803
10.1	2.96533
10.1062	2.94824
10.1125	2.73188
10.1188	2.94431
10.125	3.26582
10.1312	3.20659
10.1375	3.07747
10.1438	3.22211
10.15	3.2672
10.1562	3.11339
10.1625	3.00773
10.1687	2.99634
10.175	2.9111
10.1813	2.71129
10.1875	2.73491
10.1937	2.73267
10.2	2.9268
10.2063	2.82169
10.2125	2.5788
10.2188	2.7124
10.225	2.33847
10.2312	2.63449
10.2375	2.70104
10.2438	2.19183
10.25	2.19453
10.2562	2.4101
10.2625	2.41001
10.2688	2.37693
10.275	2.35703
10.2812	2.15006
10.2875	2.5063
10.2937	2.27961
10.3	2.4957
10.3063	2.35333
10.3125	2.54061
10.3187	2.78221
10.325	2.81053
10.3313	2.7204
10.3375	2.6817
10.3438	2.77249
10.35	2.90533
10.3562	2.88553
10.3625	3.10528
10.3688	3.01474
10.375	3.12913
10.3812	3.11244
10.3875	3.06458
10.3938	2.95163
10.4	2.72698
10.4062	2.6238
10.4125	2.73969
10.4187	2.7459
10.425	2.64021
10.4313	2.33147
10.4375	2.23983
10.4437	2.38621
10.45	2.1428
10.4563	2.60347
10.4625	2.36925
10.4688	2.23209
10.475	2.47645
10.4812	2.23958
10.4875	2.89886
10.4938	2.75575
10.5	2.71214
10.5062	2.79676
10.5125	2.95047
10.5188	2.80871
10.525	2.92818
10.5312	2.74997
10.5375	2.8019
10.5437	2.6174
10.55	2.77852
10.5563	2.58844
10.5625	2.41643
10.5687	2.37925
10.575	2.25863
10.5813	2.48373
10.5875	2.4769
10.5938	2.39846
10.6	2.49344
10.6062	2.7805
10.6125	2.38815
10.6188	2.4912
10.625	2.41643
10.6312	2.73594
10.6375	2.8424
10.6438	2.80603
10.65	2.77947
10.6562	2.89351
10.6625	2.92685
10.6687	2.69785
10.675	2.67554
10.6813	2.45993
10.6875	2.82636
10.6937	2.7394
10.7	2.67247
10.7063	2.62383
10.7125	2.58116
10.7188	2.53407
10.725	2.51583
10.7312	2.26256
10.7375	2.24787
10.7438	2.6303
10.75	2.73409
10.7562	2.52984
10.7625	2.40041
10.7688	2.6085
10.775	2.7309
10.7812	2.61225
10.7875	3.02353
10.7937	2.84518
10.8	2.98065
10.8063	2.89412
10.8125	2.98917
10.8187	2.71694
10.825	2.35527
10.8313	2.33383
10.8375	2.60719
10.8438	2.54786
10.85	2.41262
10.8562	2.57761
10.8625	2.55358
10.8688	2.52683
10.875	1.92453
10.8812	1.92374
10.8875	2.3528
10.8938	1.94881
10.9	2.59047
10.9062	2.63472
10.9125	2.56498
10.9187	2.0838
10.925	2.95541
10.9313	3.00146
10.9375	2.89776
10.9437	2.89708
10.95	3.05489
10.9563	3.03486
10.9625	1.83239
10.9688	2.02524
10.975	1.9324
10.9812	2.18815
10.9875	1.80433
10.9938	1.71871
11	1.82771
11.0062	1.74632
11.0125	1.7312
11.0188	1.66689
11.025	1.74947
11.0312	1.72536
11.0375	1.88233
11.0437	1.98657
11.05	1.72049
11.0563	1.73566
11.0625	1.91244
11.0687	1.90779
11.075	2.57108
11.0813	2.50408
11.0875	1.87108
11.0938	1.92481
11.1	1.97221
11.1062	1.75416
11.1125	1.8593
11.1188	1.86214
11.125	1.79398
11.1312	1.72401
11.1375	1.84769
11.1438	1.69581
11.15	1.61616
11.1562	1.6929
11.1625	1.7106
11.1687	1.69462
11.175	1.68558
11.1813	1.8601
11.1875	1.83794
11.1937	1.73023
11.2	1.75855
11.2063	1.84653
11.2125	1.74251
11.2188	2.01791
11.225	1.90949
11.2312	2.06452
11.2375	1.8615
11.2438	2.31314
11.25	1.96613
11.2562	1.97291
11.2625	1.88192
11.2688	1.85435
11.275	1.91066
11.2812	1.75132
11.2875	1.91518
11.2937	1.84702
11.3	1.70103
11.3063	1.87552
11.3125	1.79499
11.3187	1.88294
11.325	1.84901
11.3313	1.92918
11.3375	2.00609
11.3438	2.00425
11.35	1.9746
11.3562	2.34302
11.3625	2.47682
11.3688	2.59555
11.375	2.54617
11.3812	2.42363
11.3875	2.31059
11.3938	2.14942
11.4	2.45063
11.4062	2.35437
11.4125	2.26371
11.4187	1.94002
11.425	2.0528
11.4313	1.86296
11.4375	2.13319
11.4437	2.00095
11.45	1.93427
11.4563	2.01491
11.4625	2.45482
11.4688	2.38041
11.475	2.14358
11.4812	2.03538
11.4875	2.47806
11.4938	2.78382
11.5	2.47358
11.5062	2.55812
11.5125	2.38327
11.5188	2.93003
11.525	2.67118
11.5312	2.50293
11.5375	2.54907
11.5437	2.20792
11.55	2.10812
11.5563	2.37865
11.5625	2.23635
11.5687	2.40134
11.575	2.05832
11.5813	2.36294
11.5875	2.23893
11.5938	2.15314
11.6	2.26794
11.6062	2.39891
11.6125	2.61586
11.6188	2.36328
11.625	2.64028
11.6312	2.65999
11.6375	2.86151
11.6438	2.21206
11.65	2.13164
11.6562	1.9736
11.6625	2.3249
11.6687	1.99026
11.675	2.17161
11.6813	1.92363
11.6875	1.78009
11.6937	2.13011
11.7	2.02796
11.7063	1.95155
11.7125	2.01263
11.7188	1.7398
11.725	1.80225
11.7312	1.92636
11.7375	1.78829
11.7438	1.64046
11.75	2.07086
11.7562	1.64561
11.7625	1.43531
11.7688	1.56207
11.775	1.80521
11.7812	1.65814
11.7875	1.73545
11.7937	1.73433
11.8	1.88122
11.8063	1.84307
11.8125	1.85163
11.8187	1.81629
11.825	1.86669
11.8313	1.63894
11.8375	1.90243
11.8438	1.77567
11.85	1.66735
11.8562	1.64281
11.8625	1.71346
11.8688	1.53557
11.875	1.51443
11.8812	1.60958
11.8875	1.59838
11.8938	1.99347
11.9	1.8746
11.9062	1.71866
11.9125	1.63245
11.9187	2.08147
11.925	1.81838
11.9313	1.95759
11.9375	2.27104
11.9437	2.01297
11.95	1.85878
11.9563	1.75655
11.9625	1.94382
11.9688	1.77539
11.975	1.75083
11.9812	1.76308
11.9875	1.89777
11.9938	1.77885
12	1.69001
12.0062	1.93126
12.0125	1.98692
12.0188	1.90128
12.025	1.84538
12.0312	1.93103
12.0375	2.01055
12.0437	2.26492
12.05	2.11214
12.0563	2.07765
12.0625	1.96143
12.0687	1.86488
12.075	1.90111
12.0813	1.97216
12.0875	1.66003
12.0938	1.8644
12.1	1.6056
12.1062	1.70024
12.1125	1.67323
12.1188	1.71124
12.125	1.94599
12.1312	1.79774
12.1375	1.8097
12.1438	1.94109
12.15	2.05561
12.1562	2.04287
12.1625	1.97432
12.1687	2.12068
12.175	2.29416
12.1813	2.16348
12.1875	2.14251
12.1937	2.48904
12.2	2.34345
12.2063	2.38619
12.2125	2.32499
12.2188	2.38365
12.225	2.33215
12.2312	2.2193
12.2375	2.33835
12.2438	2.22913
12.25	1.95747
12.2562	2.12913
12.2625	1.94672
12.2688	1.95973
12.275	2.02449
12.2812	1.88071
12.2875	2.00766
12.2937	1.97641
12.3	2.181
12.3063	2.4357
12.3125	2.11931
12.3187	2.06846
12.325	2.30605
12.3313	2.48157
12.3375	2.37356
12.3438	2.22757
12.35	2.16364
12.3562	2.27502
12.3625	2.37388
12.3688	2.15613
12.375	2.05854
12.3812	1.90622
12.3875	2.0048
12.3938	2.10901
12.4	2.12686
12.4062	1.79243
12.4125	1.99405
12.4187	1.73308
12.425	1.87639
12.4313	1.76584
12.4375	2.1507
12.4437	2.13935
12.45	2.41659
12.4563	2.20299
12.4625	2.09837
12.4688	2.42691
12.475	2.26969
[truncated: 1,711 more rows]

## Sheet: Fig 4d
Data for Fig 4d
h ~ 36 μm	f = 35 Hz
Time (s)	β (rad)
0	2.59699
0.0047	2.37647
0.0094	2.2802
0.0141	2.37719
0.0188	2.3536
0.0235	2.1673
0.0282	2.30912
0.0329	2.13106
0.0376	1.80743
0.0423	1.88093
0.047	2.36989
0.0517	1.86324
0.0564	1.92132
0.0611	1.44891
0.0658	1.49884
0.0705	1.60063
0.0752	1.74749
0.0799	1.63695
0.0846	1.75365
0.0893	1.263
0.094	1.40092
0.0987	1.23149
0.1034	1.45999
0.1081	1.44621
0.1128	1.4922
0.1175	1.34614
0.1222	1.28741
0.1269	1.37182
0.1316	1.08074
0.1363	1.35128
0.141	1.29135
0.1457	1.18196
0.1504	0.89073
0.1551	1.06492
0.1598	1.03513
0.1645	1.23081
0.1692	1.04647
0.1739	0.79871
0.1786	0.8614
0.1833	0.91011
0.188	0.79346
0.1927	0.87716
0.1974	0.83522
0.2021	0.8009
0.2068	0.52827
0.2115	0.666
0.2162	0.74444
0.2209	0.69077
0.2256	0.78949
0.2303	0.57846
0.235	0.44762
0.2397	0.44011
0.2444	0.56479
0.2491	0.51762
0.2538	0.76384
0.2585	0.32862
0.2632	0.52734
0.2679	0.39805
0.2726	0.24818
0.2773	0.39224
0.282	0.3418
0.2867	0.40206
0.2914	0.51382
0.2961	0.46663
0.3008	0.28463
0.3055	0.39003
0.3102	0.46665
0.3149	0.39644
0.3196	0.57385
0.3243	0.48987
0.329	0.44504
0.3337	0.485
0.3384	0.37036
0.3431	0.41673
0.3478	0.54073
0.3525	0.67671
0.3572	0.68617
0.3619	0.69039
0.3666	0.62517
0.3713	0.78122
0.376	0.68861
0.3807	0.69009
0.3854	0.70264
0.3901	0.92749
0.3948	1.04115
0.3995	0.91498
0.4042	0.89786
0.4089	0.76231
0.4136	0.62615
0.4183	0.67771
0.423	0.67416
0.4277	0.73789
0.4324	0.73245
0.4371	0.527
0.4418	0.73024
0.4465	0.52402
0.4512	0.6578
0.4559	0.54169
0.4606	0.42539
0.4653	0.59428
0.47	0.55608
0.4747	0.3814
0.4794	0.39647
0.4841	0.45013
0.4888	0.34699
0.4935	0.48812
0.4982	0.55643
0.5029	0.4019
0.5076	0.41018
0.5123	0.22193
0.517	0.21576
0.5217	0.48319
0.5264	0.35697
0.5311	0.21756
0.5358	0.06431
0.5405	0.11586
0.5452	0.34124
0.5499	0.30305
0.5546	0.26724
0.5593	0.18848
0.564	0.31093
0.5687	0.14689
0.5734	0.32127
0.5781	0.16919
0.5828	0.15175
0.5875	0.37893
0.5922	0.00814
0.5969	0.16836
0.6016	0.02457
0.6063	0.05072
0.611	0.06034
0.6157	0.08227
0.6204	0.08559
0.6251	6.26412
0.6298	0.01035
0.6345	6.1383
0.6392	6.18775
0.6439	0.0123
0.6486	6.22894
0.6533	6.10608
0.658	0.03595
0.6627	6.11978
0.6674	6.06457
0.6721	6.10112
0.6768	6.10083
0.6815	6.05976
0.6862	6.13786
0.6909	5.80395
0.6956	5.85734
0.7003	6.06172
0.705	5.93637
0.7097	5.9332
0.7144	6.03523
0.7191	5.86916
0.7238	5.83866
0.7285	6.0466
0.7332	5.76396
0.7379	5.84344
0.7426	5.97585
0.7473	5.96183
0.752	5.74531
0.7567	5.79246
0.7614	5.5991
0.7661	5.62697
0.7708	5.74114
0.7755	5.727
0.7802	5.69558
0.7849	5.83452
0.7896	5.56482
0.7943	5.54721
0.799	5.79614
0.8037	5.56185
0.8084	5.73389
0.8131	5.7816
0.8178	5.56487
0.8225	5.42837
0.8272	5.65091
0.8319	5.56467
0.8366	5.56811
0.8413	5.57646
0.846	5.34121
0.8507	5.35258
0.8554	5.58847
0.8601	5.11104
0.8648	5.09855
0.8695	5.24407
0.8742	5.30282
0.8789	5.233
0.8836	5.2971
0.8883	4.87474
0.893	4.87498
0.8977	5.32329
0.9024	4.84561
0.9071	4.96406
0.9118	5.13036
0.9165	4.60719
0.9212	4.63077
0.9259	4.69023
0.9306	4.74958
0.9353	4.69205
0.94	4.83454
0.9447	4.68619
0.9494	4.43134
0.9541	4.67307
0.9588	4.27
0.9635	4.45022
0.9682	4.3054
0.9729	4.37476
0.9776	4.20463
0.9823	4.28553
0.987	4.20296
0.9917	4.1131
0.9964	4.33552
1.0011	3.91685
1.0058	4.11736
1.0105	4.1677
1.0152	4.06889
1.0199	4.15483
1.0246	4.06607
1.0293	3.87388
1.034	4.01801
1.0387	3.91556
1.0434	3.68014
1.0481	3.80032
1.0528	3.83567
1.0575	3.68729
1.0622	3.77051
1.0669	3.72402
1.0716	3.86112
1.0763	3.61622
1.081	3.66218
1.0857	3.52428
1.0904	3.64119
1.0951	3.57666
1.0998	3.30616
1.1045	3.47413
1.1092	3.30072
1.1139	3.23208
1.1186	3.26739
1.1233	3.27059
1.128	3.33989
1.1327	3.14648
1.1374	3.26762
1.1421	2.97749
1.1468	3.02944
1.1515	3.02944
1.1562	3.13764
1.1609	2.97812
1.1656	3.10329
1.1703	2.97974
1.175	2.64773
1.1797	2.92493
1.1844	2.87954
1.1891	2.79412
1.1938	2.94806
1.1985	2.78506
1.2032	2.74165
1.2079	2.71751
1.2126	2.88699
1.2173	2.52229
1.222	2.45944
1.2267	2.5081
1.2314	2.43942
1.2361	2.39853
1.2408	2.44938
1.2455	2.38898
1.2502	2.31102
1.2549	2.54386
1.2596	2.3584
1.2643	2.25522
1.269	2.46505
1.2737	1.92758
1.2784	2.07571
1.2831	2.30832
1.2878	1.90335
1.2925	1.97931
1.2972	1.98539
1.3019	1.84709
1.3066	1.82224
1.3113	1.87915
1.316	1.72145
1.3207	1.69701
1.3254	1.95284
1.3301	1.68946
1.3348	1.49349
1.3395	1.64816
1.3442	1.52725
1.3489	1.43125
1.3536	1.69661
1.3583	1.5655
1.363	1.50571
1.3677	1.41354
1.3724	1.4177
1.3771	1.42794
1.3818	1.39147
1.3865	1.42634
1.3912	1.35129
1.3959	1.46528
1.4006	1.27181
1.4053	1.18155
1.41	1.29358
1.4147	1.26286
1.4194	1.23877
1.4241	1.11724
1.4288	1.01876
1.4335	0.95235
1.4382	1.04251
1.4429	0.92574
1.4476	0.95798
1.4523	0.98711
1.457	0.81113
1.4617	1.01679
1.4664	1.04347
1.4711	0.80732
1.4758	0.67726
1.4805	0.79508
1.4852	0.54223
1.4899	0.56281
1.4946	0.64093
1.4993	0.74338
1.504	0.60402
1.5087	0.51533
1.5134	0.52256
1.5181	0.54605
1.5228	0.59391
1.5275	0.63085
1.5322	0.59185
1.5369	0.43788
1.5416	0.37726
1.5463	0.5226
1.551	0.46411
1.5557	0.46276
1.5604	0.53389
1.5651	0.45103
1.5698	0.47385
1.5745	0.48814
1.5792	0.40631
1.5839	0.37522
1.5886	0.36913
1.5933	0.37047
1.598	0.42134
1.6027	0.33414
1.6074	0.23317
1.6121	0.22897
1.6168	0.47047
1.6215	0.23517
1.6262	0.02537
1.6309	0.27134
1.6356	0.24185
1.6403	0.12778
1.645	0.21864
1.6497	0.21733
1.6544	0.12233
1.6591	0.08024
1.6638	0.27922
1.6685	6.27623
1.6732	0.11933
1.6779	0.01829
1.6826	0.08955
1.6873	0.06141
1.692	0.0748
1.6967	0.13984
1.7014	0.11889
1.7061	0.01101
1.7108	0.06864
1.7155	6.27842
1.7202	6.27827
1.7249	0.22949
1.7296	0.14623
1.7343	6.27884
1.739	0.06485
1.7437	6.25554
1.7484	0.0766
1.7531	6.25554
1.7578	6.23402
1.7625	6.25022
1.7672	6.11002
1.7719	5.99771
1.7766	6.24304
1.7813	6.19013
1.786	6.06172
1.7907	6.12908
1.7954	5.84858
1.8001	5.93067
1.8048	6.23055
1.8095	5.92609
1.8142	6.03058
1.8189	6.09273
1.8236	5.87593
1.8283	5.90691
1.833	6.08971
1.8377	5.86071
1.8424	5.96282
1.8471	6.05657
1.8518	5.91349
1.8565	5.84052
1.8612	6.06008
1.8659	5.8528
1.8706	5.86308
1.8753	5.89815
1.88	5.77137
1.8847	5.51468
1.8894	5.70797
1.8941	5.79501
1.8988	5.52103
1.9035	5.79185
1.9082	5.41013
1.9129	5.3887
1.9176	5.68005
1.9223	5.50416
1.927	5.42895
1.9317	5.71881
1.9364	5.41575
1.9411	5.49046
1.9458	5.34517
1.9505	5.35737
1.9552	5.34116
1.9599	5.42896
1.9646	5.46989
1.9693	5.18429
1.974	5.27942
1.9787	5.09504
1.9834	5.0869
1.9881	4.96603
1.9928	5.14766
1.9975	5.19182
2.0022	5.13715
2.0069	5.22872
2.0116	5.09845
2.0163	5.02646
2.021	4.99821
2.0257	4.96769
2.0304	4.78653
2.0351	5.0994
2.0398	5.02189
2.0445	4.84729
2.0492	4.76271
2.0539	4.9215
2.0586	4.7632
2.0633	4.75958
2.068	4.74827
2.0727	4.69902
2.0774	4.7788
2.0821	4.5347
2.0868	4.57454
2.0915	4.62272
2.0962	4.48719
2.1009	4.53527
2.1056	4.52795
2.1103	4.29611
2.115	4.33012
2.1197	4.50329
2.1244	4.19292
2.1291	4.19101
2.1338	4.4494
2.1385	4.2968
2.1432	4.35374
2.1479	4.28598
2.1526	4.25244
2.1573	4.18956
2.162	4.13489
2.1667	4.09042
2.1714	4.18025
2.1761	4.21273
2.1808	4.00444
2.1855	3.94853
2.1902	4.23365
2.1949	3.80338
2.1996	3.83357
2.2043	4.03625
2.209	3.70747
2.2137	3.70717
2.2184	3.88595
2.2231	3.77106
2.2278	3.76657
2.2325	3.80491
2.2372	3.65079
2.2419	3.59327
2.2466	3.65919
2.2513	3.63116
2.256	3.67973
2.2607	3.71325
2.2654	3.49424
2.2701	3.64431
2.2748	3.65224
2.2795	3.44847
2.2842	3.46459
2.2889	3.54705
2.2936	3.47403
2.2983	3.48476
2.303	3.58175
2.3077	3.48807
2.3124	3.27712
2.3171	3.36054
2.3218	3.35218
2.3265	3.35089
2.3312	3.39127
2.3359	3.35089
2.3406	3.28912
2.3453	3.38528
2.35	3.27693
2.3547	3.269
2.3594	3.30262
2.3641	3.1877
2.3688	3.15625
2.3735	3.1104
2.3782	3.21182
2.3829	3.03693
2.3876	3.22182
2.3923	3.15307
2.397	2.89549
2.4017	3.00999
2.4064	3.02254
2.4111	3.04489
2.4158	2.85191
2.4205	2.72389
2.4252	2.82356
2.4299	2.6969
2.4346	2.92685
2.4393	2.77675
2.444	2.87672
2.4487	2.48167
2.4534	2.59238
2.4581	2.66617
2.4628	2.71339
2.4675	2.65849
2.4722	2.51792
2.4769	2.3752
2.4816	2.40377
2.4863	2.50698
2.491	2.54971
2.4957	2.29174
2.5004	2.49857
2.5051	1.94114
2.5098	1.9725
2.5145	1.98994
2.5192	2.23238
2.5239	2.18888
2.5286	2.08
2.5333	1.92533
2.538	1.79444
2.5427	1.84308
2.5474	1.90048
2.5521	1.7599
2.5568	1.49926
2.5615	1.64459
2.5662	1.47807
2.5709	1.79178
2.5756	1.53819
2.5803	1.44454
2.585	1.67531
2.5897	1.55349
2.5944	1.37372
2.5991	1.40641
2.6038	1.57724
2.6085	1.17954
2.6132	1.26206
2.6179	1.58641
2.6226	1.21499
2.6273	1.2202
2.632	1.21777
2.6367	1.18974
2.6414	1.29105
2.6461	1.12622
2.6508	1.1554
2.6555	1.0309
2.6602	0.99555
2.6649	1.15539
2.6696	0.96952
2.6743	0.85343
2.679	0.99278
2.6837	0.92438
2.6884	0.9862
2.6931	0.8795
2.6978	0.96663
2.7025	0.77639
2.7072	0.77358
2.7119	0.84708
2.7166	0.74139
2.7213	0.83815
2.726	0.72547
2.7307	0.81404
2.7354	0.68037
2.7401	0.44867
2.7448	0.91374
2.7495	0.64014
2.7542	0.81111
2.7589	0.73723
2.7636	0.67467
2.7683	0.64333
2.773	0.56538
2.7777	0.6084
2.7824	0.69172
2.7871	0.69084
2.7918	0.47808
2.7965	0.41753
2.8012	0.47621
2.8059	0.4762
2.8106	0.46592
2.8153	0.45764
2.82	0.48013
2.8247	0.29706
2.8294	0.24617
2.8341	0.3029
2.8388	0.39329
2.8435	0.45514
2.8482	0.38318
2.8529	0.35522
2.8576	0.37125
2.8623	0.41827
2.867	0.53223
2.8717	0.48724
2.8764	0.21725
2.8811	0.2707
2.8858	0.11652
2.8905	0.38418
2.8952	0.34627
2.8999	0.35864
2.9046	0.15092
2.9093	0.05857
2.914	0.23122
2.9187	0.19523
2.9234	0.37513
2.9281	0.22232
2.9328	6.26762
2.9375	0.24832
2.9422	0.02737
2.9469	0.34243
2.9516	0.36652
2.9563	0.09295
2.961	0.19424
2.9657	0.16764
2.9704	0.23973
2.9751	0.09518
2.9798	0.16314
2.9845	0.16314
2.9892	6.22045
2.9939	0.16218
2.9986	0.03133
3.0033	0.16876
3.008	0.09351
3.0127	0.01425
3.0174	0.10121
3.0221	6.07272
3.0268	6.07322
3.0315	0.15731
3.0362	0.05415
3.0409	0.14636
3.0456	0.00602
3.0503	6.13986
3.055	6.16262
3.0597	6.10492
3.0644	6.08239
3.0691	6.09586
3.0738	6.16057
3.0785	5.91468
3.0832	5.87911
3.0879	6.08215
3.0926	6.08394
3.0973	6.15123
3.102	6.00586
3.1067	5.89705
3.1114	5.88972
3.1161	6.01588
3.1208	6.00908
3.1255	6.02368
3.1302	6.05357
3.1349	5.93067
3.1396	5.87842
3.1443	5.9118
3.149	5.87541
3.1537	5.77397
3.1584	6.05344
3.1631	5.6767
3.1678	5.86062
3.1725	5.80067
3.1772	5.832
3.1819	5.5992
3.1866	5.83619
3.1913	5.60997
3.196	5.38317
3.2007	5.62626
3.2054	5.38355
3.2101	5.41526
3.2148	5.65454
3.2195	5.45839
3.2242	5.30169
3.2289	5.443
3.2336	5.09597
3.2383	5.20072
3.243	5.31346
3.2477	5.01981
3.2524	5.11338
3.2571	5.24348
3.2618	5.04761
3.2665	5.26666
3.2712	5.287
3.2759	5.15318
3.2806	5.26665
3.2853	5.01266
3.29	5.1938
3.2947	5.16924
3.2994	5.07083
3.3041	4.88843
3.3088	4.75268
3.3135	4.96662
3.3182	5.02676
3.3229	4.72014
3.3276	4.86634
3.3323	5.02074
3.337	4.88335
3.3417	4.99117
3.3464	5.07787
3.3511	5.07074
3.3558	5.093
3.3605	5.45831
3.3652	5.21879
3.3699	5.57491
3.3746	5.50298
3.3793	5.46775
3.384	5.42562
3.3887	5.49471
3.3934	5.62089
3.3981	5.55857
3.4028	5.80911
3.4075	5.75852
3.4122	5.83903
3.4169	5.9415
3.4216	5.94033
3.4263	5.87217
3.431	5.93702
3.4357	5.98331
3.4404	6.01778
3.4451	5.82783
3.4498	5.97006
3.4545	5.98542
3.4592	6.02677
3.4639	6.14912
3.4686	6.03903
3.4733	6.13346
3.478	6.06134
3.4827	6.12698
3.4874	6.03963
3.4921	5.97097
3.4968	5.99686
3.5015	6.13703
3.5062	5.8002
3.5109	6.02999
3.5156	5.91792
3.5203	5.90949
3.525	5.89201
3.5297	5.99308
3.5344	5.81392
3.5391	5.7441
3.5438	5.93488
3.5485	5.75511
3.5532	5.90078
3.5579	6.02387
3.5626	6.17259
3.5673	6.07265
3.572	5.984
3.5767	6.0446
3.5814	0.077
3.5861	6.24981
3.5908	6.21668
3.5955	6.12674
3.6002	6.16273
3.6049	6.03608
3.6096	0.10634
3.6143	6.2728
3.619	0.12359
3.6237	0.1022
3.6284	0.15996
3.6331	0.18754
3.6378	0.05797
3.6425	0.1866
3.6472	0.05513
3.6519	0.06543
3.6566	0.15469
3.6613	0.2073
3.666	0.15546
3.6707	0.20409
3.6754	0.0461
3.6801	0.000360567
3.6848	0.01566
3.6895	0.05049
3.6942	6.17159
3.6989	0.11152
3.7036	6.09329
3.7083	0.06182
3.713	6.19856
3.7177	6.05043
3.7224	6.12248
3.7271	6.21573
3.7318	5.97027
3.7365	6.054
3.7412	5.99932
3.7459	6.12715
3.7506	5.92559
3.7553	6.01638
3.76	6.01107
3.7647	5.92599
3.7694	5.85259
3.7741	5.96411
3.7788	5.92586
3.7835	5.97497
3.7882	5.92451
3.7929	5.77678
3.7976	5.91994
3.8023	5.76386
3.807	5.82546
3.8117	5.68252
3.8164	5.72729
3.8211	5.47938
3.8258	5.37025
3.8305	5.60554
3.8352	5.58224
3.8399	5.33482
3.8446	5.40564
3.8493	5.14685
3.854	5.08114
3.8587	5.33214
3.8634	4.85496
3.8681	5.07437
3.8728	5.30637
3.8775	4.93654
3.8822	4.93734
3.8869	4.93708
3.8916	4.76021
3.8963	4.69794
3.901	4.77504
3.9057	4.56737
3.9104	4.74604
3.9151	4.75428
3.9198	4.51761
3.9245	4.67528
3.9292	4.78807
3.9339	4.30633
3.9386	4.1864
3.9433	4.4868
3.948	4.32798
3.9527	4.38152
3.9574	4.40533
3.9621	4.34597
3.9668	4.27642
3.9715	4.2657
3.9762	4.0474
3.9809	4.09595
3.9856	4.21744
3.9903	4.13615
3.995	4.11829
3.9997	3.9647
4.0044	4.00369
4.0091	3.86377
4.0138	4.0254
4.0185	3.79085
4.0232	3.66428
4.0279	3.72117
4.0326	3.87995
4.0373	3.68302
4.042	3.59031
4.0467	3.76768
4.0514	3.65216
4.0561	3.6268
4.0608	3.62001
4.0655	3.52454
4.0702	3.5516
4.0749	3.28476
4.0796	3.42449
4.0843	3.31948
4.089	3.311
4.0937	3.26014
4.0984	3.41378
4.1031	3.23443
4.1078	3.14474
4.1125	3.15791
4.1172	3.24108
4.1219	3.0761
4.1266	3.22816
4.1313	3.00991
4.136	2.94078
4.1407	2.77569
4.1454	3.04109
4.1501	2.99887
4.1548	3.06155
4.1595	2.88248
4.1642	2.82163
4.1689	2.83978
4.1736	2.69715
4.1783	2.56804
4.183	2.70113
4.1877	2.61949
4.1924	2.71804
4.1971	2.68241
4.2018	2.66518
4.2065	2.27902
4.2112	2.53471
4.2159	2.43468
4.2206	2.25915
4.2253	2.0162
4.23	2.3283
4.2347	2.33397
4.2394	2.21586
4.2441	2.35601
4.2488	1.94402
4.2535	2.0633
4.2582	2.05097
4.2629	1.69772
4.2676	1.85202
4.2723	2.20002
4.277	1.86977
4.2817	2.04488
4.2864	1.77218
4.2911	2.08339
4.2958	1.75997
4.3005	2.09282
4.3052	1.65956
4.3099	1.78412
4.3146	1.82525
4.3193	1.66543
4.324	1.67908
4.3287	1.80549
4.3334	1.38256
4.3381	1.50499
4.3428	1.5805
4.3475	1.29058
4.3522	1.37228
4.3569	1.3518
4.3616	1.09261
4.3663	1.14203
4.371	1.33595
4.3757	1.16545
4.3804	1.09691
4.3851	1.12993
4.3898	1.17141
4.3945	1.08135
4.3992	0.96869
4.4039	0.81825
4.4086	1.002
4.4133	1.22092
4.418	0.85824
4.4227	0.8684
4.4274	1.01704
4.4321	1.0053
4.4368	1.05542
4.4415	1.00261
4.4462	0.9649
4.4509	0.67415
4.4556	0.86589
4.4603	0.64786
4.465	0.65696
4.4697	0.72511
4.4744	0.63517
4.4791	0.52875
4.4838	0.65448
4.4885	0.73726
4.4932	0.66333
4.4979	0.71132
4.5026	0.56774
4.5073	0.60199
4.512	0.55927
4.5167	0.56358
4.5214	0.66076
4.5261	0.6047
4.5308	0.42781
4.5355	0.44452
4.5402	0.42971
4.5449	0.41626
4.5496	0.39314
4.5543	0.47205
4.559	0.49036
4.5637	0.55164
4.5684	0.49143
4.5731	0.47614
4.5778	0.7345
4.5825	0.82757
4.5872	0.57065
4.5919	0.60129
4.5966	0.57665
4.6013	0.59669
4.606	0.91246
4.6107	0.8754
4.6154	0.74081
4.6201	0.82777
4.6248	0.88515
4.6295	0.68547
4.6342	1.08892
4.6389	1.00809
4.6436	0.97558
4.6483	1.00262
4.653	0.92955
4.6577	0.80986
4.6624	0.8925
4.6671	0.71793
4.6718	0.80677
4.6765	0.71915
4.6812	0.77246
4.6859	0.68573
4.6906	0.58062
4.6953	0.63754
4.7	0.67596
4.7047	0.52478
4.7094	0.45806
4.7141	0.56059
4.7188	0.49296
4.7235	0.42301
4.7282	0.49619
4.7329	0.54067
4.7376	0.41001
4.7423	0.43181
4.747	0.41965
4.7517	0.54883
4.7564	0.53278
4.7611	0.29894
4.7658	0.33593
4.7705	0.39084
4.7752	0.29585
4.7799	0.28609
4.7846	0.32591
4.7893	0.29002
4.794	0.21244
4.7987	0.26213
4.8034	0.15833
4.8081	0.21208
4.8128	0.28674
4.8175	0.18169
4.8222	0.30585
4.8269	0.15189
4.8316	0.12234
4.8363	0.19035
4.841	0.17174
4.8457	0.22153
4.8504	0.14356
4.8551	0.10022
4.8598	0.12075
4.8645	0.1567
4.8692	0.13862
4.8739	0.13868
4.8786	0.075
4.8833	0.075
4.888	0.07934
4.8927	0.07353
4.8974	0.0139
4.9021	0.01948
4.9068	0.02975
4.9115	0.00837
4.9162	6.16631
4.9209	6.24189
4.9256	0.02182
4.9303	6.10934
4.935	0.03082
4.9397	0.00623
4.9444	0.00456
4.9491	6.15847
4.9538	6.15145
4.9585	6.25777
4.9632	6.06721
4.9679	6.18935
4.9726	6.05676
4.9773	6.06073
4.982	6.15189
4.9867	6.08796
4.9914	6.1545
4.9961	6.10306
5.0008	5.9707
5.0055	5.87009
5.0102	6.07397
5.0149	5.92837
5.0196	5.7578
5.0243	5.98398
5.029	6.06549
5.0337	5.88337
5.0384	5.95908
5.0431	6.09817
5.0478	5.98735
5.0525	5.91419
5.0572	5.85796
5.0619	5.78933
5.0666	5.64374
5.0713	5.96036
5.076	5.64312
5.0807	5.55965
5.0854	5.66519
5.0901	5.65324
5.0948	5.70019
5.0995	5.66778
5.1042	5.55091
5.1089	5.78807
5.1136	5.6307
5.1183	5.51852
5.123	5.56002
5.1277	5.58106
5.1324	5.52861
5.1371	5.36593
5.1418	5.5166
5.1465	5.37216
5.1512	5.44299
5.1559	5.41905
5.1606	5.52007
5.1653	5.07427
5.17	5.40702
5.1747	5.15628
5.1794	4.9245
5.1841	5.26977
5.1888	4.89718
5.1935	4.94493
5.1982	5.05306
5.2029	4.86288
5.2076	4.95446
5.2123	4.8785
5.217	4.69361
5.2217	4.60508
5.2264	4.74134
5.2311	4.55285
5.2358	4.60111
5.2405	4.59487
5.2452	4.44876
5.2499	4.52054
5.2546	4.68082
5.2593	4.48066
5.264	4.43633
5.2687	4.33827
5.2734	4.27348
5.2781	4.39745
5.2828	4.35618
5.2875	4.15737
5.2922	4.2446
5.2969	4.15275
5.3016	4.3132
5.3063	4.09192
5.311	3.99163
5.3157	4.06315
5.3204	4.0541
5.3251	4.12519
5.3298	3.94611
5.3345	3.78146
5.3392	3.83511
5.3439	4.22193
5.3486	3.99476
5.3533	3.89035
5.358	3.8432
5.3627	3.69024
5.3674	3.69441
5.3721	3.7838
5.3768	3.72257
5.3815	3.76156
5.3862	3.67302
5.3909	3.49006
5.3956	3.39517
5.4003	3.48983
5.405	3.45408
5.4097	3.36103
5.4144	3.56489
5.4191	3.31881
5.4238	3.28574
5.4285	3.3779
5.4332	3.39109
5.4379	3.29522
5.4426	3.29539
5.4473	3.25265
5.452	3.11446
5.4567	3.12812
5.4614	3.21768
5.4661	2.98942
5.4708	3.20577
5.4755	2.97449
5.4802	2.91024
5.4849	2.99849
5.4896	2.91373
5.4943	3.0674
5.499	3.00455
5.5037	2.63888
5.5084	2.66571
5.5131	2.72906
5.5178	2.95134
5.5225	2.73698
5.5272	2.82969
5.5319	2.60167
5.5366	2.67312
5.5413	2.33283
5.546	2.76253
5.5507	2.62931
5.5554	2.58891
5.5601	2.23905
5.5648	2.40158
5.5695	2.35134
5.5742	2.44826
5.5789	2.48374
5.5836	2.51173
5.5883	1.83003
5.593	2.1378
5.5977	2.14756
5.6024	2.26753
5.6071	2.35548
5.6118	2.20112
5.6165	1.93882
5.6212	1.97488
5.6259	1.72451
5.6306	2.14976
5.6353	1.98785
5.64	1.95812
5.6447	1.95145
5.6494	1.76364
5.6541	1.38511
5.6588	1.7504
5.6635	1.71608
5.6682	1.62676
5.6729	1.75598
5.6776	1.64508
5.6823	1.58321
5.687	1.55622
5.6917	1.66037
5.6964	1.626
5.7011	1.70275
5.7058	1.55766
5.7105	1.52761
5.7152	1.73433
5.7199	1.44408
5.7246	1.57522
5.7293	1.54127
5.734	1.3131
5.7387	1.44235
5.7434	1.57724
5.7481	1.42616
5.7528	1.47853
5.7575	1.27747
5.7622	1.04605
5.7669	1.02949
5.7716	1.2657
5.7763	1.23339
5.781	1.13419
5.7857	1.24063
5.7904	0.84943
5.7951	1.00231
5.7998	1.0196
5.8045	1.01776
5.8092	0.8507
5.8139	1.11997
5.8186	0.87721
5.8233	0.82015
5.828	0.92225
5.8327	0.84246
5.8374	0.98717
5.8421	0.96448
5.8468	0.63595
5.8515	0.65147
5.8562	0.61653
5.8609	0.73464
5.8656	0.73668
5.8703	0.7215
5.875	0.51364
5.8797	0.61273
5.8844	0.69163
5.8891	0.66868
5.8938	0.42097
5.8985	0.64718
5.9032	0.54855
5.9079	0.49599
5.9126	0.50932
5.9173	0.55075
5.922	0.60513
5.9267	0.62739
5.9314	0.46821
5.9361	0.43835
5.9408	0.39419
5.9455	0.43407
5.9502	0.555
5.9549	0.49934
5.9596	0.45747
5.9643	0.47428
5.969	0.54369
5.9737	0.43238
5.9784	0.4192
5.9831	0.44208
5.9878	0.29235
5.9925	0.30514
5.9972	0.2189
6.0019	0.23571
6.0066	0.32155
6.0113	0.2909
6.016	0.35775
6.0207	0.25178
6.0254	0.18062
6.0301	0.31956
6.0348	0.3003
6.0395	0.26149
6.0442	0.23065
6.0489	0.21663
6.0536	0.25468
6.0583	0.26346
6.063	0.20449
6.0677	0.2107
6.0724	0.22645
6.0771	0.16607
6.0818	0.16768
6.0865	0.22035
6.0912	0.03289
6.0959	0.20441
6.1006	0.22398
6.1053	0.19789
6.11	0.17943
6.1147	0.07051
6.1194	0.11739
6.1241	0.06616
6.1288	0.02999
6.1335	6.27419
6.1382	6.17454
6.1429	6.2438
6.1476	0.07501
6.1523	0.03682
6.157	6.27975
6.1617	0.02048
6.1664	6.21905
6.1711	6.26585
6.1758	6.10375
6.1805	6.18388
6.1852	6.20636
6.1899	6.05579
6.1946	6.02284
6.1993	6.03138
6.204	6.08039
6.2087	6.15044
6.2134	6.1538
6.2181	6.01284
6.2228	5.98081
6.2275	5.9709
6.2322	6.09904
6.2369	6.08619
6.2416	6.05602
6.2463	5.90066
6.251	5.76616
6.2557	6.00386
6.2604	6.11689
6.2651	6.10838
6.2698	5.99714
6.2745	5.98419
6.2792	5.80194
6.2839	5.79425
6.2886	5.97721
6.2933	5.70033
6.298	5.87217
6.3027	5.76879
6.3074	5.7383
6.3121	5.67103
6.3168	5.71227
6.3215	5.71295
6.3262	5.69429
6.3309	5.47662
6.3356	5.45498
6.3403	5.42794
6.345	5.67984
6.3497	5.59247
6.3544	5.51992
6.3591	5.51469
6.3638	5.33951
6.3685	5.34982
6.3732	5.551
6.3779	5.39204
6.3826	5.62509
6.3873	5.27446
6.392	5.04358
6.3967	5.27864
6.4014	5.65967
6.4061	5.09485
6.4108	5.1894
6.4155	5.20836
6.4202	5.10494
6.4249	4.96003
6.4296	5.05392
6.4343	4.96291
6.439	5.07621
6.4437	4.93919
6.4484	4.56366
6.4531	4.76017
6.4578	4.86581
6.4625	4.72795
6.4672	4.66039
6.4719	4.8444
6.4766	4.62718
6.4813	4.47754
6.486	4.53157
6.4907	4.47388
6.4954	4.3138
6.5001	4.49242
6.5048	4.41787
6.5095	4.27279
6.5142	4.20052
6.5189	4.24523
6.5236	4.17768
6.5283	3.9543
6.533	4.18068
6.5377	4.02422
6.5424	4.00128
6.5471	3.91461
6.5518	3.77624
6.5565	3.97797
6.5612	3.94662
6.5659	3.85435
6.5706	3.81927
6.5753	3.85859
6.58	3.96447
6.5847	3.91937
6.5894	3.99354
6.5941	4.02325
6.5988	3.80086
6.6035	3.77029
6.6082	3.7427
6.6129	3.88014
6.6176	3.76038
6.6223	3.68314
6.627	3.67095
6.6317	3.61696
6.6364	3.66987
6.6411	3.87247
6.6458	3.72677
6.6505	3.67973
6.6552	3.77651
6.6599	3.49078
6.6646	3.34374
6.6693	3.54773
6.674	3.70105
6.6787	3.41769
6.6834	3.61193
6.6881	3.38407
6.6928	3.32759
6.6975	3.41125
6.7022	3.29887
6.7069	3.44495
6.7116	3.37307
6.7163	3.38743
6.721	3.24898
6.7257	3.24263
6.7304	3.27512
6.7351	3.36055
6.7398	3.16346
6.7445	3.19152
6.7492	3.24212
6.7539	3.16432
6.7586	3.2495
6.7633	3.16311
6.768	3.11457
6.7727	3.15824
6.7774	3.12352
6.7821	3.17416
6.7868	2.95631
6.7915	2.95007
6.7962	2.99295
6.8009	3.00515
6.8056	3.02694
6.8103	3.06448
6.815	2.71947
6.8197	2.67418
6.8244	2.64396
6.8291	2.78978
6.8338	2.82725
6.8385	2.73947
6.8432	2.52489
6.8479	2.30011
6.8526	2.439
6.8573	2.73448
6.862	2.59436
6.8667	2.62606
6.8714	2.58388
6.8761	2.14822
6.8808	2.12224
6.8855	2.52466
6.8902	2.12763
6.8949	2.04842
6.8996	2.40483
6.9043	2.14682
6.909	2.04507
6.9137	2.19914
6.9184	1.96709
6.9231	2.01963
6.9278	2.01084
6.9325	1.70947
6.9372	1.86564
6.9419	2.01459
6.9466	1.86159
6.9513	1.86591
6.956	1.79261
6.9607	1.71194
6.9654	1.80937
6.9701	1.66231
6.9748	1.51375
6.9795	1.4793
6.9842	1.38178
6.9889	1.25162
6.9936	1.3484
6.9983	1.49158
7.003	1.4422
7.0077	1.28898
7.0124	1.3032
7.0171	1.43689
7.0218	1.44632
7.0265	1.37003
7.0312	1.21432
7.0359	1.47436
7.0406	1.1221
7.0453	1.11227
7.05	1.06203
7.0547	1.22158
7.0594	1.15432
7.0641	1.0615
7.0688	1.00365
7.0735	0.88713
7.0782	0.8507
7.0829	0.77611
7.0876	0.85154
7.0923	0.96589
7.097	0.73377
7.1017	0.84641
7.1064	0.94809
7.1111	0.91585
7.1158	0.61228
7.1205	0.69691
7.1252	0.87472
7.1299	0.65471
7.1346	0.62682
7.1393	0.88034
7.144	0.70825
7.1487	0.59798
7.1534	0.61574
7.1581	0.58232
7.1628	0.64594
7.1675	0.56072
7.1722	0.47363
7.1769	0.47231
7.1816	0.46933
7.1863	0.51284
7.191	0.45861
7.1957	0.54479
7.2004	0.31556
7.2051	0.26063
7.2098	0.3273
7.2145	0.42978
7.2192	0.42216
7.2239	0.40591
7.2286	0.34163
7.2333	0.27419
7.238	0.29822
7.2427	0.31845
7.2474	0.25892
7.2521	0.40298
7.2568	0.22916
7.2615	0.20164
7.2662	0.2811
7.2709	0.16852
7.2756	0.28388
7.2803	6.22651
7.285	0.07996
7.2897	0.000814583
7.2944	0.000814583
7.2991	0.13116
7.3038	6.16027
7.3085	0.01707
7.3132	0.23951
7.3179	6.24762
7.3226	6.27113
7.3273	0.01
7.332	6.24375
7.3367	6.1501
7.3414	0.17231
7.3461	6.11197
7.3508	6.22619
7.3555	0.10638
7.3602	6.19533
7.3649	0.05018
7.3696	6.21338
7.3743	6.06509
7.379	6.07952
7.3837	6.26157
7.3884	6.17201
7.3931	6.1556
7.3978	0.0249
7.4025	6.12927
7.4072	6.11438
7.4119	6.22444
7.4166	6.13661
7.4213	6.17583
7.426	6.2015
7.4307	6.03874
7.4354	6.12224
7.4401	6.26523
7.4448	6.216
7.4495	6.16043
7.4542	6.19553
7.4589	5.92129
7.4636	5.7287
7.4683	6.10986
7.473	6.08556
7.4777	6.00756
7.4824	6.01827
7.4871	5.95733
7.4918	5.89808
7.4965	5.85046
7.5012	6.01029
7.5059	5.99178
7.5106	5.87608
7.5153	5.78998
7.52	5.8244
7.5247	5.76219
7.5294	5.9095
7.5341	5.90902
7.5388	5.9395
7.5435	5.72447
7.5482	5.80074
7.5529	5.78477
7.5576	5.83308
7.5623	5.66264
7.567	5.66119
7.5717	5.92492
7.5764	5.62607
7.5811	5.68889
7.5858	5.75981
7.5905	5.60738
7.5952	5.79742
7.5999	5.64986
7.6046	5.54224
7.6093	5.48585
7.614	5.69582
7.6187	5.60152
7.6234	5.62606
7.6281	5.59848
7.6328	5.44973
7.6375	5.47189
7.6422	5.71004
7.6469	5.36989
7.6516	5.59995
7.6563	5.49189
7.661	5.24376
7.6657	5.51755
7.6704	5.39144
7.6751	5.34249
7.6798	5.59828
7.6845	5.45922
7.6892	5.39741
7.6939	4.92319
7.6986	5.55579
7.7033	5.04256
7.708	5.05248
7.7127	4.94927
7.7174	4.99053
7.7221	5.03888
7.7268	5.233
7.7315	5.08089
7.7362	5.07022
7.7409	5.12135
7.7456	4.94179
7.7503	4.93787
7.755	5.15439
7.7597	4.67906
7.7644	4.87207
7.7691	5.06861
7.7738	4.8785
7.7785	4.78777
7.7832	4.99408
7.7879	4.78696
7.7926	4.63629
7.7973	4.72269
7.802	4.61863
7.8067	4.70372
7.8114	4.92192
7.8161	4.65984
7.8208	4.73895
7.8255	4.72247
7.8302	4.55285
7.8349	4.65121
7.8396	4.40247
7.8443	4.61177
7.849	4.3468
7.8537	4.37308
7.8584	4.42568
7.8631	4.33149
7.8678	4.54674
7.8725	4.20264
7.8772	4.18968
7.8819	4.25484
7.8866	4.21833
7.8913	4.3218
7.896	4.31976
7.9007	4.11907
7.9054	4.06073
7.9101	4.15147
7.9148	4.01541
7.9195	4.01448
7.9242	4.17841
7.9289	4.07267
7.9336	3.96049
7.9383	3.97064
7.943	3.78094
7.9477	3.74096
7.9524	3.82316
7.9571	3.57179
7.9618	3.6772
7.9665	3.68267
7.9712	3.78699
7.9759	3.7896
7.9806	3.84843
7.9853	3.67845
7.99	3.6793
7.9947	3.54576
7.9994	3.56865
8.0041	3.76013
8.0088	3.67357
8.0135	3.61795
8.0182	3.35552
8.0229	3.48406
8.0276	3.40441
8.0323	3.57398
8.037	3.55543
8.0417	3.2781
8.0464	3.47372
8.0511	3.37426
8.0558	3.45477
8.0605	3.45725
8.0652	3.33989
8.0699	3.35616
8.0746	3.19701
8.0793	3.18496
8.084	3.28015
8.0887	3.32765
8.0934	3.25529
8.0981	3.20559
8.1028	3.17971
8.1075	3.11602
8.1122	3.19378
8.1169	3.03999
8.1216	3.07343
8.1263	3.04092
8.131	3.10461
8.1357	3.06039
8.1404	3.07132
8.1451	2.98616
8.1498	2.97994
8.1545	2.96787
8.1592	2.93639
8.1639	2.71022
8.1686	2.86012
8.1733	2.90281
8.178	2.9721
8.1827	2.8124
8.1874	2.52281
8.1921	2.56612
8.1968	2.82423
8.2015	2.57683
8.2062	2.6747
8.2109	2.74049
8.2156	2.4072
8.2203	2.27042
8.225	2.59648
8.2297	2.55656
8.2344	2.5295
8.2391	2.70723
8.2438	2.20733
8.2485	2.23621
8.2532	2.3489
8.2579	2.53554
8.2626	2.32716
8.2673	2.52238
8.272	1.90542
8.2767	1.94143
8.2814	1.98528
8.2861	2.09816
8.2908	2.04394
8.2955	1.99711
8.3002	1.95185
8.3049	1.7909
8.3096	1.95232
8.3143	1.78115
8.319	1.91556
8.3237	1.7486
8.3284	1.75182
8.3331	1.6911
8.3378	1.76585
8.3425	1.66935
8.3472	1.6634
8.3519	1.67389
8.3566	1.5401
8.3613	1.51432
8.366	1.42166
8.3707	1.36761
8.3754	1.46976
8.3801	1.42948
8.3848	1.26575
8.3895	1.42634
8.3942	1.39473
8.3989	1.36876
8.4036	1.42038
8.4083	1.45965
8.413	1.2397
8.4177	1.10872
8.4224	1.39703
8.4271	1.41843
8.4318	1.42724
8.4365	1.07489
8.4412	1.29591
8.4459	1.26523
8.4506	1.2763
8.4553	1.00777
8.46	1.26998
8.4647	1.22167
8.4694	0.76564
8.4741	0.93349
8.4788	1.22167
8.4835	0.91796
8.4882	0.81713
8.4929	0.99791
8.4976	1.021
8.5023	0.84302
8.507	0.87341
8.5117	1.01706
8.5164	0.88411
8.5211	0.97761
8.5258	0.82563
8.5305	0.76819
8.5352	0.79624
8.5399	0.97054
8.5446	0.67497
8.5493	0.81993
8.554	0.72877
8.5587	0.74447
8.5634	0.69146
8.5681	0.83218
8.5728	0.78111
8.5775	0.7263
8.5822	0.6461
8.5869	0.61443
8.5916	0.58369
8.5963	0.55041
8.601	0.62849
8.6057	0.66084
8.6104	0.49553
8.6151	0.5058
8.6198	0.52264
8.6245	0.46342
8.6292	0.529
8.6339	0.47242
8.6386	0.49749
8.6433	0.43742
8.648	0.64224
8.6527	0.5186
8.6574	0.32862
8.6621	0.29451
8.6668	0.40904
8.6715	0.38688
8.6762	0.5203
8.6809	0.41295
8.6856	0.33172
8.6903	0.28303
8.695	0.17095
8.6997	0.4598
8.7044	0.2987
8.7091	0.33368
8.7138	0.27742
8.7185	0.2425
8.7232	0.24797
8.7279	0.21805
8.7326	0.23296
8.7373	0.18433
8.742	0.09126
8.7467	0.06272
8.7514	0.10865
8.7561	0.03672
8.7608	0.01679
8.7655	0.26971
8.7702	0.15966
8.7749	0.09061
8.7796	0.1192
8.7843	0.11758
8.789	0.03209
8.7937	0.25328
8.7984	0.01494
8.8031	0.20328
8.8078	6.27593
8.8125	0.00758
8.8172	0.02244
8.8219	6.25296
8.8266	6.1732
8.8313	6.19821
8.836	0.07593
8.8407	6.06215
8.8454	6.24818
8.8501	6.15779
8.8548	0.03166
8.8595	0.01502
8.8642	6.20429
8.8689	6.16395
8.8736	6.08074
8.8783	6.108
8.883	6.21573
8.8877	0.02446
8.8924	6.17429
8.8971	6.08828
8.9018	6.19673
8.9065	6.00703
8.9112	6.16075
8.9159	5.95749
8.9206	6.14203
8.9253	6.00856
8.93	6.16333
8.9347	6.16246
8.9394	6.08905
8.9441	6.00486
8.9488	6.08402
8.9535	5.98883
8.9582	5.88253
8.9629	5.87395
8.9676	5.93637
8.9723	5.91888
8.977	5.93954
8.9817	5.91303
8.9864	5.81419
8.9911	5.82533
8.9958	5.90436
9.0005	5.92842
9.0052	5.94592
9.0099	5.89828
9.0146	5.82631
9.0193	5.71043
9.024	5.85487
9.0287	5.87787
9.0334	5.77897
9.0381	5.78246
9.0428	5.50741
9.0475	5.7571
9.0522	5.79481
9.0569	5.53373
9.0616	5.6938
9.0663	5.63946
9.071	5.7755
9.0757	5.538
9.0804	5.67285
9.0851	5.55014
9.0898	5.57277
9.0945	5.73634
9.0992	5.48758
9.1039	5.45862
9.1086	5.61358
9.1133	5.4073
9.118	5.40951
9.1227	5.38709
9.1274	5.27172
9.1321	5.10164
9.1368	5.42122
9.1415	5.08114
9.1462	5.13885
9.1509	5.33824
9.1556	4.92644
9.1603	4.90138
9.165	4.96599
9.1697	4.99451
9.1744	4.9963
9.1791	5.32458
9.1838	4.77051
9.1885	4.93962
9.1932	4.9687
9.1979	4.88924
9.2026	4.69742
9.2073	4.88431
9.212	4.90084
9.2167	4.57925
9.2214	4.64909
9.2261	4.69189
9.2308	4.7115
9.2355	4.61971
9.2402	4.61535
9.2449	4.67949
9.2496	4.89413
9.2543	4.55285
9.259	4.62405
9.2637	4.48103
9.2684	4.7294
9.2731	4.56387
9.2778	4.57565
9.2825	4.42168
9.2872	4.53575
9.2919	4.4765
9.2966	4.65964
9.3013	4.39206
9.306	4.49794
9.3107	4.39263
9.3154	4.36366
9.3201	4.3339
9.3248	4.06194
9.3295	4.19441
9.3342	4.16259
9.3389	4.11524
9.3436	4.19419
9.3483	4.22016
9.353	4.05279
9.3577	3.96727
9.3624	4.04986
9.3671	3.96504
9.3718	4.09533
9.3765	3.97314
9.3812	3.86573
[truncated: 7,233 more rows]

## Sheet: Fig 4e
Data for Fig 4e
h ~ 2.5 μm	f = 35 Hz
Time (s)	Speed (μm/s)
0.0122	0
0.1098	17.2141
0.2074	15.3542
0.305	5.39905
0.4026	5.66222
0.5002	18.374
0.5978	7.85549
0.6954	13.5657
0.793	17.7485
0.8906	11.0886
0.9882	9.47591
1.0858	13.2227
1.1834	11.8497
1.281	12.6522
1.3786	12.044
1.4762	15.057
1.5738	12.3281
1.6714	22.0509
1.769	13.5247
1.8666	20.5988
1.9642	13.0771
2.0618	12.2414
2.1594	15.6051
2.257	12.3214
2.3546	14.705
2.4522	16.5479
2.5498	24.1628
2.6474	8.73474
2.745	22.3272
2.8426	14.0394
2.9402	11.1725
3.0378	11.7852
3.1354	17.111
3.233	12.9648
3.3306	12.3926
3.4282	14.018
3.5258	6.11188
3.6234	10.7208
3.721	9.86597
3.8186	14.2086
3.9162	10.5635

[truncated: 10 more sheets: Fig 4f, Fig 4g, Fig 4h, Fig 4i, Fig 4j, Fig 4k, Fig 4l, Fig 4m, Fig 4n, Fig 5d]
